# Supplementary material for: Pseudomonas syringae pv. actinidiae (PSA) Isolates from Recent Bacterial Canker of Kiwifruit Outbreaks Belong to the Same Genetic Lineage
Source: PubMed Central journal article supplement (PMC3348921; doi:10.1371/journal.pone.0036518), 2012-05-09
Supplement: pone.0036518.s003.pdf [file pone.0036518.s003.pdf]

Supplementary Table 3. Comparison of gene content among *Psa* isolates based on aligning reads against the reference genome of *Psa* NCPPB3739 (GenBank:AFTH01000000).

| Gene                                                                                                                         | Location                       | 346      | 7285   | 7286   | 7287   | K2     | KW41   | PA459  | CH2010-5 | CH2010-6 | NCPPB2598     |
|------------------------------------------------------------------------------------------------------------------------------|--------------------------------|----------|--------|--------|--------|--------|--------|--------|----------|----------|---------------|
| As predicted by RAST ( <a href="http://http://rast.nmpdr.org/">http://http://rast.nmpdr.org/</a> )                           | (GenBank accession: start-end) | Portugal | Italy  | Italy  | Italy  | Korea  | Japan  | Japan  | China    | China    | Japan (theae) |
| Transposase and inactivated derivatives;Note=Transposase and inactivated derivatives                                         | AFTH01000611.1: 4152-5201      | ○ 0.03   | ○ 0.03 | ○ 0.03 | ○ 0.03 | ● 1.00 | ● 1.00 | ○ 0.03 | ○ 0.03   | ○ 0.03   | ○ 0.03        |
| Name=Integrase Integrase;Note=Integrase                                                                                      | AFTH01000608.1: 7182-8417      | ○ 0.05   | ○ 0.05 | ○ 0.04 | ○ 0.05 | ● 1.00 | ● 1.00 | ● 1.00 | ○ 0.11   | ○ 0.11   | ○ 0.00        |
| FIG00960122: hypothetical protein;Note=FIG00960122: hypothetical protein                                                     | AFTH01000608.1: 8689-10047     | ● 0.93   | ● 0.94 | ● 0.94 | ● 0.95 | ● 1.00 | ● 1.00 | ● 1.00 | ● 0.96   | ● 0.96   | ○ 0.00        |
| putative integrase protein;Note=putative integrase protein                                                                   | AFTH01000603.1: 481-2139       | ● 1.00   | ● 1.00 | ● 1.00 | ● 1.00 | ○ 0.00 | ○ 0.14 | ● 1.00 | ● 1.00   | ● 1.00   | ● 1.00        |
| Name=DNA_invertase DNA-invertase;Note=DNA-invertase                                                                          | AFTH01000603.1: 2123-2683      | ● 1.00   | ● 1.00 | ● 1.00 | ● 1.00 | ○ 0.00 | ○ 0.36 | ● 1.00 | ● 1.00   | ● 1.00   | ● 1.00        |
| hypothetical protein;Note=hypothetical protein                                                                               | AFTH01000588.1: 107-1519       | ○ 0.01   | ○ 0.01 | ○ 0.02 | ○ 0.01 | ○ 1.00 | ○ 1.00 | ○ 1.00 | ○ 0.12   | ○ 0.12   | ○ 0.02        |
| Sucrose specific transcriptional regulator CscR2C LacI family;Note=Sucrose specific transcriptional regulator CscR2C LacI fa | AFTH01000580.1: 240-1187       | ● 1.00   | ● 1.00 | ● 1.00 | ● 1.00 | ○ 0.00 | ○ 1.00 | ● 1.00 | ● 1.00   | ● 1.00   | ● 1.00        |
| Transducer protein car;Note=Transducer protein car                                                                           | AFTH01000580.1: 1306-7014      | ● 1.00   | ● 1.00 | ● 1.00 | ● 1.00 | ○ 0.00 | ○ 1.00 | ● 1.00 | ● 1.00   | ● 1.00   | ● 1.00        |
| Methyl-accepting chemotaxis protein;Note=Methyl-accepting chemotaxis protein                                                 | AFTH01000574.1: 3273-3647      | ● 0.82   | ● 0.96 | ● 1.00 | ● 0.97 | ○ 0.00 | ○ 0.00 | ● 1.00 | ● 1.00   | ● 1.00   | ● 1.00        |
| hypothetical protein;Note=hypothetical protein                                                                               | AFTH01000574.1: 3705-5111      | ● 0.98   | ● 0.98 | ● 1.00 | ● 1.00 | ○ 0.00 | ○ 0.00 | ● 1.00 | ● 1.00   | ● 1.00   | ● 1.00        |
| Aconitase B;Note=Aconitase B                                                                                                 | AFTH01000574.1: 5121-5450      | ● 1.00   | ● 1.00 | ● 1.00 | ● 1.00 | ○ 0.00 | ○ 0.16 | ● 1.00 | ● 1.00   | ● 1.00   | ● 1.00        |
| Putative heat shock protein YegD;Note=Putative heat shock protein YegD                                                       | AFTH01000556.1: 2445-4010      | ● 1.00   | ● 1.00 | ● 1.00 | ● 1.00 | ● 1.00 | ● 1.00 | ● 1.00 | ● 1.00   | ● 1.00   | ○ 0.00        |
| hypothetical protein;Note=hypothetical protein                                                                               | AFTH01000556.1: 4560-4724      | ● 1.00   | ● 1.00 | ● 1.00 | ● 1.00 | ● 1.00 | ● 1.00 | ● 0.90 | ● 1.00   | ● 1.00   | ○ 0.00        |
| plasmid stability protein StbC;Note=plasmid stability protein StbC                                                           | AFTH01000552.1: 2222-2344      | ● 1.00   | ● 1.00 | ● 1.00 | ● 1.00 | ● 1.00 | ● 1.00 | ● 1.00 | ● 1.00   | ● 1.00   | ○ 0.00        |
| plasmid stability protein StbB;Note=plasmid stability protein StbB                                                           | AFTH01000552.1: 2341-2487      | ● 1.00   | ● 1.00 | ● 1.00 | ● 1.00 | ● 1.00 | ● 1.00 | ● 1.00 | ● 1.00   | ● 1.00   | ○ 0.00        |
| FIG00959382: hypothetical protein;Note=FIG00959382: hypothetical protein                                                     | AFTH01000552.1: 4851-5771      | ● 1.00   | ● 1.00 | ● 1.00 | ● 1.00 | ● 1.00 | ● 1.00 | ● 1.00 | ● 1.00   | ● 1.00   | ○ 0.00        |
| SanC2C putative;Note=SanC2C putative                                                                                         | AFTH01000552.1: 8388-8759      | ● 1.00   | ● 1.00 | ● 1.00 | ● 1.00 | ● 1.00 | ● 1.00 | ● 1.00 | ● 1.00   | ● 1.00   | ○ 0.00        |
| hypothetical protein;Note=hypothetical protein                                                                               | AFTH01000551.1: 588-713        | ● 1.00   | ● 1.00 | ● 1.00 | ● 1.00 | ● 1.00 | ● 1.00 | ● 1.00 | ● 1.00   | ● 1.00   | ○ 0.00        |
| FIG00963107: hypothetical protein;Note=FIG00963107: hypothetical protein                                                     | AFTH01000540.1: 11799-13172    | ● 1.00   | ● 1.00 | ● 1.00 | ● 1.00 | ● 1.00 | ● 1.00 | ● 1.00 | ● 1.00   | ● 1.00   | ○ 0.00        |
| hypothetical protein;Note=hypothetical protein                                                                               | AFTH01000527.1: 1288-1500      | ● 1.00   | ● 1.00 | ● 1.00 | ● 1.00 | ○ 0.00 | ○ 0.00 | ● 1.00 | ● 1.00   | ● 1.00   | ○ 0.00        |
| ABC-type polar amino acid transport system2C ATPase component;Note=ABC-type polar amino acid transport system2C A            | AFTH01000517.1: 34267-35064    | ● 1.00   | ● 1.00 | ● 1.00 | ● 1.00 | ● 1.00 | ● 1.00 | ● 1.00 | ● 1.00   | ● 1.00   | ○ 0.01        |
| ABC-type amino acid transport/signal transduction systems2C periplasmic component/domain;Note=ABC-type amino acid            | AFTH01000517.1: 36446-36799    | ● 1.00   | ● 1.00 | ● 1.00 | ● 1.00 | ● 1.00 | ● 1.00 | ● 1.00 | ● 1.00   | ● 1.00   | ○ 0.00        |
| hypothetical protein;Note=hypothetical protein                                                                               | AFTH01000764.1: 1553-2389      | ● 1.00   | ● 1.00 | ● 1.00 | ● 1.00 | ● 1.00 | ● 1.00 | ● 1.00 | ● 1.00   | ● 1.00   | ○ 0.00        |
| ABC-type amino acid transport/signal transduction systems2C periplasmic component/domain;Note=ABC-type amino acid            | AFTH01000517.1: 37018-37317    | ● 1.00   | ● 1.00 | ● 1.00 | ● 1.00 | ● 1.00 | ● 1.00 | ● 1.00 | ● 1.00   | ● 1.00   | ○ 0.00        |
| membrane protein2C putative;Note=membrane protein2C putative                                                                 | AFTH01000764.1: 2515-3042      | ● 1.00   | ● 1.00 | ● 1.00 | ● 1.00 | ● 1.00 | ● 1.00 | ● 1.00 | ● 1.00   | ● 1.00   | ○ 0.00        |
| site-specific recombinase2C phage integrase family;Note=site-specific recombinase2C phage integrase family                   | AFTH01000508.1: 1139-2149      | ● 1.00   | ● 1.00 | ● 1.00 | ● 1.00 | ● 1.00 | ● 1.00 | ● 1.00 | ● 1.00   | ● 1.00   | ○ 0.00        |
| Serine protease;Note=Serine protease                                                                                         | AFTH01000508.1: 2127-3182      | ○ 0.08   | ○ 0.07 | ○ 0.08 | ○ 0.08 | ● 1.00 | ● 1.00 | ● 1.00 | ○ 0.08   | ○ 0.08   | ○ 0.00        |
| TonB-dependent receptor%3B Outer membrane receptor for ferrienterochelin and colicins;Note=TonB-dependent recept             | AFTH01000505.1: 53-2452        | ○ 0.02   | ○ 0.02 | ○ 0.02 | ○ 0.02 | ● 1.00 | ● 1.00 | ● 1.00 | ○ 0.09   | ○ 0.09   | ○ 0.02        |
| avirulence protein;Note=avirulence protein                                                                                   | AFTH01000500.1: 16469-16915    | ● 1.00   | ● 1.00 | ● 1.00 | ● 1.00 | ● 1.00 | ● 1.00 | ● 1.00 | ● 1.00   | ● 1.00   | ○ 0.00        |
| hypothetical protein;Note=hypothetical protein                                                                               | AFTH01000499.1: 7020-7157      | ● 1.00   | ● 1.00 | ● 1.00 | ● 1.00 | ● 1.00 | ● 1.00 | ● 1.00 | ● 1.00   | ● 1.00   | ○ 0.00        |
| Conjugative transfer protein PilN in PFGE-1-like cluster;Note=Conjugative transfer protein PilN in PFGE-1-like cluster       | AFTH01000498.1: 8991-10727     | ○ 0.04   | ○ 0.00 | ○ 0.04 | ○ 0.13 | ● 1.00 | ● 1.00 | ● 1.00 | ○ 0.13   | ○ 0.13   | ● 1.00        |
| Conjugative transfer protein PilL in PFGE-1-like cluster;Note=Conjugative transfer protein PilL in PFGE-1-like cluster       | AFTH01000498.1: 10724-11869    | ○ 0.03   | ○ 0.04 | ○ 0.04 | ○ 0.17 | ● 1.00 | ● 1.00 | ● 1.00 | ○ 0.34   | ○ 0.28   | ● 1.00        |
| DNA/RNA helicase in PFGE-1-like cluster;Note=DNA/RNA helicase in PFGE-1-like cluster                                         | AFTH01000498.1: 13413-15371    | ○ 0.04   | ○ 0.04 | ○ 0.04 | ○ 0.04 | ● 1.00 | ● 1.00 | ● 1.00 | ● 0.87   | ● 0.86   | ● 0.72        |
| Conjugative transfer protein TrbJ;Note=Conjugative transfer protein TrbJ                                                     | AFTH01000760.1: 15126-15449    | ○ 0.05   | ○ 0.08 | ○ 0.06 | ○ 0.08 | ○ 0.08 | ● 1.00 | ○ 0.08 | ○ 0.09   | ○ 0.09   | ○ 0.00        |
| Protein involved in meta-pathway of phenol degradation;Note=Protein involved in meta-pathway of phenol degradation           | AFTH01000488.1: 27352-28245    | ○ 0.04   | ○ 0.04 | ○ 0.05 | ○ 0.05 | ● 1.00 | ● 1.00 | ● 1.00 | ○ 0.05   | ○ 0.05   | ● 0.86        |
| FIG045374: Type II restriction enzyme2C methylase subunit YeeA;Note=FIG045374: Type II restriction enzyme2C methylas         | AFTH01000488.1: 28230-30302    | ● 1.00   | ● 1.00 | ● 1.00 | ● 1.00 | ● 1.00 | ● 1.00 | ● 1.00 | ● 1.00   | ● 1.00   | ○ 0.00        |
| major facilitator family transporter;Note=major facilitator family transporter                                               | AFTH01000486.1: 15976-16947    | ● 1.00   | ● 1.00 | ● 1.00 | ● 1.00 | ● 1.00 | ● 1.00 | ● 1.00 | ● 1.00   | ● 1.00   | ○ 0.00        |
| 3-oxoacyl-[acyl-carrier-protein] synthase2C KASIII;Ontology_term=KEGG_ENZYME:2.3.1.41;Note=3-oxoacyl-[acyl-carrier-p         | AFTH01000486.1: 16990-17985    | ● 1.00   | ● 1.00 | ● 1.00 | ● 1.00 | ● 1.00 | ● 1.00 | ● 1.00 | ● 1.00   | ● 1.00   | ○ 0.00        |
| bacterial transferase2C hexapeptide repeat protein;Note=bacterial transferase2C hexapeptide repeat protein                   | AFTH01000486.1: 18012-18653    | ● 1.00   | ● 1.00 | ● 1.00 | ● 1.00 | ● 1.00 | ● 1.00 | ● 1.00 | ● 1.00   | ● 1.00   | ○ 0.00        |
| 3-oxoacyl-[acyl-carrier-protein] reductase;Ontology_term=KEGG_ENZYME:1.1.1.100;Note=3-oxoacyl-[acyl-carrier-protein]         | AFTH01000486.1: 18650-19411    | ● 1.00   | ● 1.00 | ● 1.00 | ● 1.00 | ● 1.00 | ● 1.00 | ● 1.00 | ● 1.00   | ● 1.00   | ○ 0.00        |
| FIG00955995: hypothetical protein;Note=FIG00955995: hypothetical protein                                                     | AFTH01000486.1: 19466-19672    | ● 1.00   | ● 1.00 | ● 1.00 | ● 1.00 | ● 1.00 | ● 1.00 | ● 1.00 | ● 1.00   | ● 1.00   | ○ 0.00        |
| hypothetical protein;Note=hypothetical protein                                                                               | AFTH01000446.1: 470-601        | ● 1.00   | ● 1.00 | ● 1.00 | ● 1.00 | ● 1.00 | ● 1.00 | ● 1.00 | ● 1.00   | ● 1.00   | ○ 0.00        |
| transcriptional regulator2C LysR family;Note=transcriptional regulator2C LysR family                                         | AFTH01000756.1: 251-1075       | ● 1.00   | ● 1.00 | ● 1.00 | ● 1.00 | ○ 0.00 | ● 1.00 | ● 1.00 | ● 1.00   | ● 1.00   | ● 1.00        |
| TRAP-type C4-dicarboxylate transport system2C periplasmic component;Note=TRAP-type C4-dicarboxylate transport syst           | AFTH01000407.1: 1095-1607      | ○ 0.04   | ○ 0.05 | ○ 0.05 | ○ 0.05 | ● 1.00 | ● 1.00 | ● 1.00 | ○ 0.14   | ○ 0.14   | ● 1.00        |
| FIG00955572: hypothetical protein;Note=FIG00955572: hypothetical protein                                                     | AFTH01000403.1: 100-1833       | ○ 0.01   | ○ 0.01 | ○ 0.05 | ○ 0.01 | ● 1.00 | ● 1.00 | ● 1.00 | ○ 0.01   | ○ 0.01   | ○ 0.01        |
| FIG00954449: hypothetical protein;Note=FIG00954449: hypothetical protein                                                     | AFTH01000756.1: 1215-3965      | ● 1.00   | ● 1.00 | ● 1.00 | ● 1.00 | ○ 0.00 | ● 1.00 | ● 1.00 | ● 1.00   | ● 1.00   | ● 1.00        |
| Two-component response regulator;Note=Two-component response regulator                                                       | AFTH01000398.1: 198-1703       | ● 1.00   | ● 1.00 | ● 1.00 | ● 1.00 | ● 1.00 | ● 1.00 | ● 1.00 | ● 1.00   | ● 1.00   | ○ 0.00        |
| FIG00962025: hypothetical protein;Note=FIG00962025: hypothetical protein                                                     | AFTH01000391.1: 668-829        | ● 1.00   | ● 1.00 | ● 1.00 | ● 1.00 | ● 1.00 | ● 1.00 | ● 1.00 | ● 1.00   | ● 1.00   | ○ 0.00        |
| Glutamate transport membrane-spanning protein;Note=Glutamate transport membrane-spanning protein                             | AFTH01000391.1: 1134-1799      | ● 1.00   | ● 1.00 | ● 1.00 | ● 1.00 | ● 1.00 | ● 1.00 | ● 1.00 | ● 1.00   | ● 1.00   | ○ 0.00        |
| Glutamate transport membrane-spanning protein;Note=Glutamate transport membrane-spanning protein                             | AFTH01000391.1: 1780-2439      | ● 1.00   | ● 1.00 | ● 1.00 | ● 1.00 | ● 1.00 | ● 1.00 | ● 1.00 | ● 1.00   | ● 1.00   | ○ 0.00        |
| ABC-type amino acid transport/signal transduction systems2C periplasmic component/domain;Note=ABC-type amino acid            | AFTH01000391.1: 3194-3760      | ● 1.00   | ● 1.00 | ● 1.00 | ● 1.00 | ● 1.00 | ● 1.00 | ● 1.00 | ● 1.00   | ● 1.00   | ○ 0.00        |
| ABC-type amino acid transport/signal transduction systems2C periplasmic component/domain;Note=ABC-type amino acid            | AFTH01000391.1: 3815-4066      | ● 1.00   | ● 1.00 | ● 1.00 | ● 1.00 | ● 1.00 | ● 1.00 | ● 1.00 | ● 1.00   | ● 1.00   | ○ 0.00        |
| transcriptional regulator2C AraC family protein;Note=transcriptional regulator2C AraC family protein                         | AFTH01000391.1: 5144-5989      | ● 1.00   | ● 1.00 | ● 1.00 | ● 1.00 | ● 1.00 | ● 1.00 | ● 1.00 | ● 1.00   | ● 1.00   | ○ 0.00        |
| candidate type III effector HolPtoQ;Note=candidate type III effector HolPtoQ                                                 | AFTH01000389.1: 443-1786       | ● 1.00   | ● 1.00 | ● 1.00 | ● 1.00 | ● 1.00 | ● 1.00 | ● 1.00 | ● 1.00   | ● 1.00   | ○ 0.00        |
| hypothetical protein;Note=hypothetical protein                                                                               | AFTH01000389.1: 3226-3366      | ● 1.00   | ● 1.00 | ● 1.00 | ● 1.00 | ● 1.00 | ● 1.00 | ● 1.00 | ● 1.00   | ● 1.00   | ○ 0.00        |
| hypothetical protein;Note=hypothetical protein                                                                               | AFTH01000389.1: 3317-3667      | ● 1.00   | ● 1.00 | ● 1.00 | ● 1.00 | ● 1.00 | ● 1.00 | ● 1.00 | ● 1.00   | ● 1.00   | ○ 0.00        |
| hypothetical protein;Note=hypothetical protein                                                                               | AFTH01000387.1: 188-364        | ● 1.00   | ● 1.00 | ● 1.00 | ● 1.00 | ● 1.00 | ● 1.00 | ● 1.00 | ● 1.00   | ● 1.00   | ○ 0.00        |
| hypothetical protein;Note=hypothetical protein                                                                               | AFTH01000376.1: 1752-1871      | ● 1.00   | ● 1.00 | ● 1.00 | ● 1.00 | ○ 0.00 | ○ 0.00 | ● 1.00 | ● 1.00   | ● 1.00   | ○ 0.00        |
| FIG00965780: hypothetical protein;Note=FIG00965780: hypothetical protein                                                     | AFTH01000372.1: 295-1002       | ● 1.00   | ● 1.00 | ● 1.00 | ● 1.00 | ● 1.00 | ● 1.00 | ● 1.00 | ● 1.00   | ● 1.00   | ○ 0.00        |
| type III effector AvrB4-2;Note=type III effector AvrB4-2                                                                     | AFTH01000366.1: 182-1144       | ● 1.00   | ● 1.00 | ● 1.00 | ● 1.00 | ○ 0.00 | ○ 0.15 | ● 1.00 | ● 1.00   | ● 1.00   | ○ 0.14        |
| hypothetical protein;Note=hypothetical protein                                                                               | AFTH01000366.1: 1672-1866      | ● 1.00   | ● 1.00 | ● 1.00 | ● 1.00 | ○ 0.00 | ○ 0.00 | ● 1.00 | ● 1.00   | ● 1.00   | ○ 0.00        |

Supplementary Table 3. Comparison of gene content among *Psa* isolates based on aligning reads against the reference genome of *Psa* NCPPB3739 (GenBank:AFTH01000000).

|                                                                                                                         |                             |   |      |   |      |   |      |   |      |   |      |   |      |   |      |   |      |   |      |   |      |
|-------------------------------------------------------------------------------------------------------------------------|-----------------------------|---|------|---|------|---|------|---|------|---|------|---|------|---|------|---|------|---|------|---|------|
| TnpA transposase;Note=TnpA transposase                                                                                  | AFTH01000366.1: 1871-2008   | ● | 1.00 | ● | 1.00 | ● | 1.00 | ● | 1.00 | ○ | 0.00 | ○ | 0.00 | ● | 1.00 | ● | 1.00 | ● | 1.00 | ● | 0.60 |
| Yersinia/Haemophilus virulence surface antigen family;Note=Yersinia/Haemophilus virulence surface antigen family        | AFTH01000366.1: 2089-3162   | ● | 1.00 | ● | 1.00 | ● | 1.00 | ● | 1.00 | ○ | 0.00 | ○ | 0.09 | ● | 1.00 | ● | 1.00 | ● | 1.00 | ● | 1.00 |
| Putative large exoprotein involved in heme utilization or adhesion of ShlA/HecA/FhaA family;Note=Putative large exoprot | AFTH01000365.1: 40-9012     | ● | 0.99 | ● | 0.98 | ● | 0.99 | ● | 0.99 | ○ | 0.00 | ● | 1.00 | ● | 1.00 | ● | 1.00 | ● | 1.00 | ● | 0.99 |
| NAD-dependent protein deacetylase of SIR2 family;Note=NAD-dependent protein deacetylase of SIR2 family                  | AFTH01000753.1: 334-552     | ● | 1.00 | ● | 1.00 | ● | 1.00 | ● | 1.00 | ● | 1.00 | ● | 1.00 | ● | 1.00 | ● | 1.00 | ● | 1.00 | ○ | 0.00 |
| Hemolysin activator protein precursor;Note=Hemolysin activator protein precursor                                        | AFTH01000753.1: 1943-3523   | ● | 1.00 | ● | 1.00 | ● | 1.00 | ● | 1.00 | ● | 1.00 | ● | 1.00 | ● | 1.00 | ● | 1.00 | ● | 1.00 | ● | 1.00 |
| Putative large exoprotein involved in heme utilization or adhesion of ShlA/HecA/FhaA family;Note=Putative large exoprot | AFTH01000753.1: 3548-12382  | ● | 1.00 | ● | 1.00 | ● | 1.00 | ● | 1.00 | ● | 1.00 | ● | 1.00 | ● | 1.00 | ● | 1.00 | ● | 1.00 | ○ | 0.02 |
| hypothetical protein;Note=hypothetical protein                                                                          | AFTH01000753.1: 12939-13058 | ● | 1.00 | ● | 1.00 | ● | 1.00 | ● | 1.00 | ● | 1.00 | ● | 1.00 | ● | 1.00 | ● | 1.00 | ● | 1.00 | ○ | 0.00 |
| TnpA transposase;Note=TnpA transposase                                                                                  | AFTH01000752.1: 4486-4974   | ○ | 0.05 | ○ | 0.01 | ○ | 0.05 | ○ | 0.04 | ● | 1.00 | ● | 1.00 | ● | 1.00 | ○ | 0.05 | ○ | 0.05 | ● | 0.34 |
| MFS general substrate transporter;Note=MFS general substrate transporter                                                | AFTH01000330.1: 18627-19889 | ● | 1.00 | ● | 1.00 | ● | 1.00 | ● | 1.00 | ● | 1.00 | ● | 1.00 | ● | 1.00 | ● | 1.00 | ● | 1.00 | ○ | 0.00 |
| hypothetical protein;Note=hypothetical protein                                                                          | AFTH01000330.1: 19912-20187 | ● | 1.00 | ● | 1.00 | ● | 1.00 | ● | 1.00 | ● | 1.00 | ● | 1.00 | ● | 1.00 | ● | 1.00 | ● | 1.00 | ○ | 0.00 |
| Dipeptide-binding ABC transporter2C periplasmic substrate-binding component (TC 3.A.1.5.2);Note=Dipeptide-binding AB    | AFTH01000330.1: 21821-22039 | ● | 1.00 | ● | 1.00 | ● | 1.00 | ● | 1.00 | ● | 1.00 | ● | 1.00 | ● | 1.00 | ● | 1.00 | ● | 1.00 | ○ | 0.00 |
| Name=transposase transposase;Note=transposase                                                                           | AFTH01000330.1: 22062-22286 | ○ | 0.36 | ○ | 0.35 | ○ | 0.36 | ○ | 0.35 | ● | 1.00 | ● | 1.00 | ● | 1.00 | ○ | 0.37 | ○ | 0.37 | ○ | 0.00 |
| NADH:flavin oxidoreductases2C Old Yellow Enzyme family;Note=NADH:flavin oxidoreductases2C Old Yellow Enzyme fami        | AFTH01000319.1: 56-238      | ● | 1.00 | ● | 1.00 | ● | 1.00 | ● | 1.00 | ● | 1.00 | ● | 1.00 | ● | 1.00 | ● | 1.00 | ● | 1.00 | ○ | 0.00 |
| hypothetical protein;Note=hypothetical protein                                                                          | AFTH01000319.1: 216-911     | ● | 1.00 | ● | 1.00 | ● | 1.00 | ● | 1.00 | ● | 1.00 | ● | 1.00 | ● | 1.00 | ● | 1.00 | ● | 1.00 | ○ | 0.00 |
| Permeases of the major facilitator superfamily;Note=Permeases of the major facilitator superfamily                      | AFTH01000319.1: 972-1358    | ● | 1.00 | ● | 1.00 | ● | 1.00 | ● | 1.00 | ● | 1.00 | ● | 1.00 | ● | 1.00 | ● | 1.00 | ● | 1.00 | ○ | 0.00 |
| NADH:flavin oxidoreductases2C Old Yellow Enzyme family;Note=NADH:flavin oxidoreductases2C Old Yellow Enzyme fami        | AFTH01000319.1: 1416-2090   | ● | 1.00 | ● | 1.00 | ● | 1.00 | ● | 1.00 | ● | 1.00 | ● | 1.00 | ● | 1.00 | ● | 1.00 | ● | 1.00 | ○ | 0.00 |
| NADH:flavin oxidoreductases2C Old Yellow Enzyme family;Note=NADH:flavin oxidoreductases2C Old Yellow Enzyme fami        | AFTH01000319.1: 2125-2526   | ● | 0.65 | ● | 0.64 | ● | 0.65 | ● | 0.65 | ● | 1.00 | ● | 1.00 | ● | 1.00 | ● | 0.66 | ● | 0.66 | ○ | 0.00 |
| Transcriptional regulator2C TetR family;Note=Transcriptional regulator2C TetR family                                    | AFTH01000319.1: 2582-3163   | ● | 0.99 | ● | 1.00 | ● | 1.00 | ● | 1.00 | ● | 1.00 | ● | 1.00 | ● | 1.00 | ● | 1.00 | ● | 1.00 | ○ | 0.00 |
| hypothetical protein;Note=hypothetical protein                                                                          | AFTH01000319.1: 4278-4457   | ● | 1.00 | ● | 1.00 | ● | 1.00 | ● | 1.00 | ● | 1.00 | ● | 1.00 | ● | 1.00 | ● | 1.00 | ● | 1.00 | ○ | 0.00 |
| transcriptional regulator2C AraC family;Note=transcriptional regulator2C AraC family                                    | AFTH01000319.1: 4667-5650   | ● | 1.00 | ● | 1.00 | ● | 1.00 | ● | 1.00 | ● | 1.00 | ● | 1.00 | ● | 1.00 | ● | 1.00 | ● | 1.00 | ○ | 0.01 |
| hypothetical protein;Note=hypothetical protein                                                                          | AFTH01000314.1: 2553-3047   | ● | 1.00 | ● | 1.00 | ● | 1.00 | ● | 1.00 | ● | 1.00 | ● | 1.00 | ● | 1.00 | ● | 1.00 | ● | 1.00 | ○ | 0.03 |
| Serine protease;Note=Serine protease                                                                                    | AFTH01000305.1: 327-2423    | ○ | 0.04 | ○ | 0.04 | ○ | 0.06 | ○ | 0.07 | ● | 1.00 | ● | 1.00 | ● | 1.00 | ○ | 0.08 | ○ | 0.08 | ○ | 0.07 |
| FIG00958716: hypothetical protein;Note=FIG00958716: hypothetical protein                                                | AFTH01000305.1: 4304-4912   | ○ | 0.47 | ○ | 0.48 | ○ | 0.52 | ○ | 0.54 | ● | 1.00 | ● | 1.00 | ● | 1.00 | ○ | 0.62 | ○ | 0.62 | ○ | 0.00 |
| TnpA transposase;Note=TnpA transposase                                                                                  | AFTH01000301.1: 103-240     | ○ | 0.51 | ○ | 0.01 | ○ | 0.54 | ○ | 0.52 | ● | 1.00 | ● | 1.00 | ● | 1.00 | ● | 0.80 | ● | 0.80 | ● | 0.84 |
| ParA family protein;Note=ParA family protein                                                                            | AFTH01000301.1: 891-1172    | ● | 1.00 | ● | 1.00 | ● | 1.00 | ● | 1.00 | ● | 1.00 | ● | 1.00 | ● | 1.00 | ● | 1.00 | ● | 1.00 | ○ | 0.00 |
| ribose ABC transporter2C permease protein;Note=ribose ABC transporter2C permease protein                                | AFTH01000283.1: 234-815     | ● | 1.00 | ● | 1.00 | ● | 1.00 | ● | 1.00 | ● | 1.00 | ● | 1.00 | ● | 1.00 | ● | 1.00 | ● | 1.00 | ○ | 0.00 |
| Transketolase2C N-terminal section;Ontology_term=KEGG_ENZYME:2.2.1.1;Note=Transketolase2C N-terminal section;On         | AFTH01000283.1: 1179-2015   | ● | 1.00 | ● | 0.98 | ● | 1.00 | ● | 1.00 | ● | 1.00 | ● | 1.00 | ● | 1.00 | ● | 1.00 | ● | 1.00 | ○ | 0.00 |
| Transketolase2C C-terminal section;Ontology_term=KEGG_ENZYME:2.2.1.1;Note=Transketolase2C C-terminal section;On         | AFTH01000283.1: 2005-2937   | ● | 1.00 | ● | 1.00 | ● | 1.00 | ● | 1.00 | ● | 1.00 | ● | 1.00 | ● | 1.00 | ● | 1.00 | ● | 1.00 | ○ | 0.05 |
| Unknown pentose kinase TM0952;Note=Unknown pentose kinase TM0952                                                        | AFTH01000283.1: 2950-4443   | ● | 0.93 | ● | 0.96 | ● | 0.92 | ● | 0.93 | ● | 1.00 | ● | 1.00 | ● | 1.00 | ● | 0.95 | ● | 0.95 | ○ | 0.01 |
| hypothetical protein;Note=hypothetical protein                                                                          | AFTH01000790.1: 608-724     | ● | 1.00 | ● | 1.00 | ● | 1.00 | ● | 1.00 | ● | 1.00 | ● | 1.00 | ● | 1.00 | ● | 1.00 | ● | 1.00 | ○ | 0.00 |
| FIG00635470: hypothetical protein;Note=FIG00635470: hypothetical protein                                                | AFTH01000261.1: 16878-17774 | ● | 1.00 | ● | 1.00 | ● | 1.00 | ● | 1.00 | ● | 1.00 | ● | 1.00 | ● | 1.00 | ● | 1.00 | ● | 1.00 | ○ | 0.00 |
| Cellulose synthase operon protein C;Note=Cellulose synthase operon protein C                                            | AFTH01000257.1: 288-4103    | ○ | 0.57 | ○ | 0.57 | ○ | 0.57 | ○ | 0.57 | ● | 1.00 | ● | 1.00 | ● | 1.00 | ○ | 0.57 | ○ | 0.57 | ○ | 0.00 |
| Colicin immunity protein;Note=Colicin immunity protein                                                                  | AFTH01000253.1: 7515-7778   | ● | 1.00 | ● | 1.00 | ● | 1.00 | ● | 1.00 | ● | 1.00 | ○ | 0.00 | ● | 1.00 | ● | 1.00 | ● | 1.00 | ○ | 0.52 |
| DNA integration/recombination/inversion protein;Note=DNA integration/recombination/inversion protein                    | AFTH01000244.1: 703-843     | ● | 1.00 | ● | 1.00 | ● | 1.00 | ● | 1.00 | ● | 1.00 | ● | 1.00 | ● | 1.00 | ● | 1.00 | ● | 1.00 | ○ | 0.00 |
| Name=Levansucrase;Ontology_term=KEGG_ENZYME:2.4.1.10;Note=Levansucrase Levansucrase;Ontology_term=KEGG_E                | AFTH01000244.1: 6684-7979   | ● | 1.00 | ● | 1.00 | ● | 1.00 | ● | 1.00 | ● | 1.00 | ● | 1.00 | ● | 1.00 | ● | 1.00 | ● | 1.00 | ○ | 0.00 |
| hypothetical protein;Note=hypothetical protein                                                                          | AFTH01000808.1: 186-344     | ● | 1.00 | ● | 1.00 | ● | 1.00 | ● | 1.00 | ○ | 0.00 | ○ | 0.00 | ● | 1.00 | ● | 1.00 | ● | 1.00 | ○ | 0.00 |
| TnpA transposase;Note=TnpA transposase                                                                                  | AFTH01000731.1: 377-1072    | ○ | 0.03 | ○ | 0.02 | ○ | 0.03 | ○ | 0.03 | ● | 1.00 | ● | 1.00 | ● | 1.00 | ○ | 0.14 | ○ | 0.14 | ○ | 0.02 |
| ATP-dependent helicase HrpB;Note=ATP-dependent helicase HrpB                                                            | AFTH01000217.1: 2220-4319   | ○ | 0.03 | ○ | 0.03 | ○ | 0.03 | ○ | 0.03 | ● | 1.00 | ● | 1.00 | ● | 1.00 | ○ | 0.03 | ○ | 0.03 | ● | 1.00 |
| hypothetical protein;Note=hypothetical protein                                                                          | AFTH01000190.1: 74-1408     | ○ | 0.74 | ○ | 0.73 | ○ | 0.73 | ○ | 0.73 | ● | 1.00 | ● | 1.00 | ● | 1.00 | ○ | 0.74 | ○ | 0.74 | ○ | 0.00 |
| hypothetical protein;Note=hypothetical protein                                                                          | AFTH01000190.1: 1748-1864   | ● | 1.00 | ● | 1.00 | ● | 1.00 | ● | 1.00 | ● | 1.00 | ● | 1.00 | ● | 1.00 | ● | 1.00 | ● | 1.00 | ○ | 0.00 |
| hypothetical protein;Note=hypothetical protein                                                                          | AFTH01000189.1: 248-508     | ● | 1.00 | ● | 1.00 | ● | 1.00 | ● | 1.00 | ● | 1.00 | ● | 1.00 | ● | 1.00 | ● | 1.00 | ● | 1.00 | ○ | 0.00 |
| hypothetical protein;Note=hypothetical protein                                                                          | AFTH01000168.1: 283-528     | ● | 1.00 | ● | 1.00 | ● | 1.00 | ● | 1.00 | ● | 1.00 | ● | 1.00 | ● | 1.00 | ● | 1.00 | ● | 1.00 | ○ | 0.00 |
| site-specific recombinase2C phage integrase family;Note=site-specific recombinase2C phage integrase family              | AFTH01000168.1: 525-1208    | ● | 1.00 | ● | 1.00 | ● | 1.00 | ● | 1.00 | ● | 1.00 | ● | 1.00 | ● | 1.00 | ● | 1.00 | ● | 1.00 | ○ | 0.00 |
| Unknown pentose utilization regulator 22C DeoR family;Note=Unknown pentose utilization regulator 22C DeoR family        | AFTH01000163.1: 29-982      | ● | 0.99 | ● | 0.99 | ● | 0.99 | ● | 0.99 | ● | 1.00 | ● | 1.00 | ● | 1.00 | ● | 1.00 | ● | 1.00 | ○ | 0.00 |
| 3-oxoacyl-[acyl-carrier protein] reductase;Ontology_term=KEGG_ENZYME:1.1.1.100;Note=3-oxoacyl-[acyl-carrier protein]    | AFTH01000163.1: 1064-1864   | ● | 1.00 | ● | 0.99 | ● | 1.00 | ● | 1.00 | ● | 1.00 | ● | 1.00 | ● | 1.00 | ● | 1.00 | ● | 1.00 | ○ | 0.00 |
| Short chain dehydrogenase;Note=Short chain dehydrogenase                                                                | AFTH01000163.1: 1895-2659   | ● | 1.00 | ● | 1.00 | ● | 1.00 | ● | 1.00 | ● | 1.00 | ● | 1.00 | ● | 1.00 | ● | 1.00 | ● | 1.00 | ○ | 0.00 |
| D-xylose transport ATP-binding protein XylG;Note=D-xylose transport ATP-binding protein XylG                            | AFTH01000163.1: 2691-2837   | ● | 1.00 | ● | 1.00 | ● | 1.00 | ● | 1.00 | ● | 1.00 | ● | 1.00 | ● | 1.00 | ● | 1.00 | ● | 1.00 | ○ | 0.00 |
| ATP binding protein;Note=ATP binding protein                                                                            | AFTH01000142.1: 204-1559    | ● | 1.00 | ● | 1.00 | ● | 1.00 | ● | 1.00 | ● | 1.00 | ● | 1.00 | ● | 1.00 | ● | 1.00 | ● | 1.00 | ○ | 0.00 |
| FIG00967211: hypothetical protein;Note=FIG00967211: hypothetical protein                                                | AFTH01000142.1: 1709-2278   | ● | 1.00 | ● | 1.00 | ● | 1.00 | ● | 1.00 | ● | 1.00 | ● | 1.00 | ● | 1.00 | ● | 1.00 | ● | 1.00 | ○ | 0.00 |
| hypothetical protein;Note=hypothetical protein                                                                          | AFTH01000132.1: 1455-2690   | ● | 1.00 | ● | 1.00 | ● | 1.00 | ● | 1.00 | ○ | 0.00 | ● | 1.00 | ● | 1.00 | ● | 1.00 | ● | 1.00 | ○ | 1.00 |
| FIG00962378: hypothetical protein;Note=FIG00962378: hypothetical protein                                                | AFTH01000724.1: 449-1399    | ● | 1.00 | ● | 1.00 | ● | 1.00 | ● | 1.00 | ● | 1.00 | ● | 1.00 | ● | 1.00 | ● | 1.00 | ● | 1.00 | ○ | 0.00 |
| hypothetical protein;Note=hypothetical protein                                                                          | AFTH01000122.1: 1638-1781   | ● | 1.00 | ● | 1.00 | ● | 1.00 | ● | 1.00 | ○ | 0.00 | ● | 1.00 | ● | 1.00 | ● | 1.00 | ● | 1.00 | ○ | 1.00 |
| hypothetical protein;Note=hypothetical protein                                                                          | AFTH01000122.1: 1818-2363   | ● | 1.00 | ● | 1.00 | ● | 1.00 | ● | 1.00 | ○ | 0.00 | ● | 1.00 | ● | 1.00 | ● | 1.00 | ● | 1.00 | ○ | 1.00 |
| NreA-like protein;Note=NreA-like protein                                                                                | AFTH01000122.1: 2592-2885   | ● | 1.00 | ● | 1.00 | ● | 1.00 | ● | 1.00 | ○ | 0.00 | ● | 1.00 | ● | 1.00 | ● | 1.00 | ● | 1.00 | ○ | 1.00 |
| hypothetical protein;Note=hypothetical protein                                                                          | AFTH01000122.1: 3214-3342   | ● | 1.00 | ● | 1.00 | ● | 1.00 | ● | 1.00 | ○ | 0.00 | ● | 1.00 | ● | 1.00 | ● | 1.00 | ● | 1.00 | ○ | 1.00 |
| COG1649 predicted glycoside hydrolase;Note=COG1649 predicted glycoside hydrolase                                        | AFTH01000                   |   |      |   |      |   |      |   |      |   |      |   |      |   |      |   |      |   |      |   |      |

Supplementary Table 3. Comparison of gene content among *Psa* isolates based on aligning reads against the reference genome of *Psa* NCPPB3739 (GenBank:AFTH01000000).

|                                                                                                                                  |                             |   |      |   |      |   |      |   |      |   |      |   |      |   |      |   |      |
|----------------------------------------------------------------------------------------------------------------------------------|-----------------------------|---|------|---|------|---|------|---|------|---|------|---|------|---|------|---|------|
| hypothetical protein;Note=hypothetical protein                                                                                   | AFTH01000070.1: 36-854      | ● | 1.00 | ● | 1.00 | ● | 1.00 | ● | 1.00 | ● | 1.00 | ● | 1.00 | ● | 1.00 | ○ | 0.00 |
| hypothetical protein;Note=hypothetical protein                                                                                   | AFTH01000808.1: 466-867     | ● | 1.00 | ● | 1.00 | ● | 1.00 | ○ | 0.00 | ○ | 0.00 | ● | 1.00 | ● | 1.00 | ● | 1.00 |
| Xylose ABC transporter2C periplasmic xylose-binding protein XylF;Note=Xylose ABC transporter2C periplasmic xylose-binding        | AFTH01000050.1: 1402-2334   | ● | 0.99 | ● | 0.96 | ● | 1.00 | ● | 1.00 | ● | 1.00 | ● | 1.00 | ● | 1.00 | ● | 1.00 |
| ribose ABC transporter2C permease protein;Note=ribose ABC transporter2C permease protein                                         | AFTH01000050.1: 2401-2604   | ● | 1.00 | ● | 0.93 | ● | 1.00 | ● | 1.00 | ● | 1.00 | ● | 1.00 | ● | 1.00 | ● | 1.00 |
| YoeB toxin protein;Note=YoeB toxin protein                                                                                       | AFTH01000047.1: 13047-13349 | ● | 1.00 | ● | 1.00 | ● | 1.00 | ● | 1.00 | ● | 1.00 | ● | 1.00 | ● | 1.00 | ● | 1.00 |
| YefM protein (antitoxin to YoeB);Note=YefM protein (antitoxin to YoeB)                                                           | AFTH01000047.1: 13321-13599 | ● | 1.00 | ● | 1.00 | ● | 1.00 | ● | 1.00 | ● | 1.00 | ● | 1.00 | ● | 1.00 | ● | 1.00 |
| Dipeptide-binding ABC transporter2C periplasmic substrate-binding component (TC 3.A.1.5.2);Note=Dipeptide-binding ABC            | AFTH01000046.1: 560-2137    | ● | 1.00 | ● | 1.00 | ● | 1.00 | ● | 1.00 | ● | 1.00 | ● | 1.00 | ● | 1.00 | ● | 1.00 |
| Dipeptide transport system permease protein DppB (TC 3.A.1.5.2);Note=Dipeptide transport system permease protein DppB            | AFTH01000046.1: 2158-3168   | ● | 1.00 | ● | 1.00 | ● | 1.00 | ● | 1.00 | ● | 1.00 | ● | 1.00 | ● | 1.00 | ● | 1.00 |
| Dipeptide transport system permease protein DppC (TC 3.A.1.5.2);Note=Dipeptide transport system permease protein DppC            | AFTH01000046.1: 3165-4016   | ● | 1.00 | ● | 1.00 | ● | 1.00 | ● | 1.00 | ● | 1.00 | ● | 1.00 | ● | 1.00 | ● | 1.00 |
| Dipeptide transport ATP-binding protein DppD (TC 3.A.1.5.2);Note=Dipeptide transport ATP-binding protein DppD (TC 3.A            | AFTH01000046.1: 4009-4857   | ● | 1.00 | ● | 1.00 | ● | 1.00 | ● | 1.00 | ● | 1.00 | ● | 1.00 | ● | 1.00 | ● | 1.00 |
| dipeptide ABC transporter2C ATP binding protein;Note=dipeptide ABC transporter2C ATP binding protein                             | AFTH01000046.1: 4854-5567   | ● | 1.00 | ● | 1.00 | ● | 1.00 | ● | 1.00 | ● | 1.00 | ● | 1.00 | ● | 1.00 | ● | 1.00 |
| Cytochrome B561;Note=Cytochrome B561                                                                                             | AFTH01000046.1: 5672-6229   | ● | 1.00 | ● | 1.00 | ● | 1.00 | ● | 1.00 | ● | 1.00 | ● | 1.00 | ● | 1.00 | ● | 1.00 |
| transmembrane sensor2C putative;Note=transmembrane sensor2C putative                                                             | AFTH01000046.1: 8364-9329   | ● | 1.00 | ● | 1.00 | ● | 1.00 | ● | 1.00 | ● | 1.00 | ● | 1.00 | ● | 1.00 | ● | 1.00 |
| TonB-dependent ferric achromobactin receptor protein;Note=TonB-dependent ferric achromobactin receptor protein                   | AFTH01000046.1: 9399-11801  | ● | 1.00 | ● | 1.00 | ● | 1.00 | ● | 1.00 | ● | 1.00 | ● | 1.00 | ● | 1.00 | ● | 1.00 |
| hypothetical protein;Note=hypothetical protein                                                                                   | AFTH01000044.1: 1288-1479   | ○ | 0.28 | ○ | 0.27 | ○ | 0.28 | ○ | 0.28 | ● | 1.00 | ● | 1.00 | ● | 1.00 | ○ | 0.67 |
| VgrG protein;Note=VgrG protein                                                                                                   | AFTH01000032.1: 1558-3585   | ● | 1.00 | ● | 1.00 | ● | 1.00 | ● | 1.00 | ● | 1.00 | ● | 1.00 | ● | 1.00 | ● | 1.00 |
| VgrG protein;Note=VgrG protein                                                                                                   | AFTH01000032.1: 4430-7744   | ● | 1.00 | ● | 1.00 | ● | 1.00 | ● | 1.00 | ● | 1.00 | ● | 1.00 | ● | 1.00 | ● | 1.00 |
| Glucans biosynthesis protein D precursor;Note=Glucans biosynthesis protein D precursor                                           | AFTH01000008.1: 34-351      | ● | 1.00 | ● | 1.00 | ● | 1.00 | ● | 1.00 | ● | 1.00 | ● | 1.00 | ● | 1.00 | ● | 1.00 |
| hypothetical protein;Note=hypothetical protein                                                                                   | AFTH01000719.1: 13957-14289 | ● | 1.00 | ● | 1.00 | ● | 1.00 | ● | 1.00 | ○ | 0.00 | ○ | 0.00 | ● | 1.00 | ● | 1.00 |
| avirulence protein;Note=avirulence protein                                                                                       | AFTH01000808.1: 1552-2571   | ● | 1.00 | ● | 1.00 | ● | 1.00 | ○ | 0.00 | ○ | 0.08 | ● | 1.00 | ● | 1.00 | ● | 1.00 |
| hypothetical protein;Note=hypothetical protein                                                                                   | AFTH01000710.1: 10142-10405 | ● | 1.00 | ● | 1.00 | ● | 1.00 | ● | 1.00 | ● | 1.00 | ● | 1.00 | ● | 1.00 | ● | 1.00 |
| RecA/RadA recombinase;Note=RecA/RadA recombinase                                                                                 | AFTH01000783.1: 116-421     | ● | 1.00 | ● | 1.00 | ● | 1.00 | ○ | 0.00 | ● | 1.00 | ● | 1.00 | ● | 1.00 | ● | 1.00 |
| DNA polymerase-like protein PA0670;Note=DNA polymerase-like protein PA0670                                                       | AFTH01000783.1: 429-1844    | ● | 1.00 | ● | 1.00 | ● | 1.00 | ○ | 0.00 | ● | 1.00 | ● | 1.00 | ● | 1.00 | ● | 1.00 |
| FIG00958014: hypothetical protein;Note=FIG00958014: hypothetical protein                                                         | AFTH01000707.1: 15984-16247 | ● | 1.00 | ● | 1.00 | ● | 1.00 | ● | 1.00 | ● | 1.00 | ● | 1.00 | ● | 1.00 | ● | 1.00 |
| DNA polymerase III alpha subunit;Ontology_term=KEGG_ENZYME:2.7.7.7;Note=DNA polymerase III alpha subunit;Ontology                | AFTH01000783.1: 1841-2605   | ● | 1.00 | ● | 1.00 | ● | 1.00 | ○ | 0.00 | ● | 1.00 | ● | 1.00 | ● | 1.00 | ● | 1.00 |
| Error-prone2C lesion bypass DNA polymerase V (UmuC);Note=Error-prone2C lesion bypass DNA polymerase V (UmuC)                     | AFTH01000705.1: 3593-3841   | ○ | 0.01 | ○ | 0.00 | ○ | 0.02 | ○ | 0.02 | ● | 1.00 | ● | 1.00 | ● | 1.00 | ○ | 0.31 |
| hypothetical protein;Note=hypothetical protein                                                                                   | AFTH01000780.1: 76-198      | ● | 1.00 | ● | 1.00 | ● | 1.00 | ● | 1.00 | ● | 1.00 | ● | 1.00 | ● | 1.00 | ● | 1.00 |
| SOS-response repressor and protease LexA;Ontology_term=KEGG_ENZYME:3.4.21.88;Note=SOS-response repressor and protease            | AFTH01000688.1: 31-648      | ● | 1.00 | ● | 1.00 | ● | 1.00 | ○ | 0.00 | ● | 1.00 | ● | 1.00 | ● | 1.00 | ● | 1.00 |
| Uncharacterized protein ImpA;Note=Uncharacterized protein ImpA                                                                   | AFTH01000681.1: 158-1489    | ○ | 0.04 | ○ | 0.04 | ○ | 0.05 | ○ | 0.04 | ● | 1.00 | ● | 1.00 | ○ | 0.10 | ○ | 0.10 |
| PUTATIVE AVRPPHE AVIRULENCE PROTEIN-HOMOLOG;Note=PUTATIVE AVRPPHE AVIRULENCE PROTEIN-HOMOLOG                                     | AFTH01000677.1: 57-1061     | ● | 1.00 | ● | 1.00 | ● | 1.00 | ○ | 0.00 | ○ | 0.22 | ● | 1.00 | ● | 1.00 | ● | 1.00 |
| hypothetical protein;Note=hypothetical protein                                                                                   | AFTH01000645.1: 1090-1263   | ○ | 0.59 | ○ | 0.58 | ○ | 0.59 | ○ | 0.60 | ● | 1.00 | ● | 1.00 | ○ | 0.59 | ○ | 0.59 |
| FIG004780: hypothetical protein in PFGI-1-like cluster;Note=FIG004780: hypothetical protein in PFGI-1-like cluster               | AFTH01000635.1: 1557-2294   | ○ | 0.05 | ○ | 0.06 | ○ | 0.07 | ○ | 0.07 | ● | 1.00 | ● | 1.00 | ● | 1.00 | ○ | 0.96 |
| Protein with ParB-like nuclease domain in PFGI-1-like cluster;Note=Protein with ParB-like nuclease domain in PFGI-1-like cluster | AFTH01000635.1: 2331-3632   | ○ | 0.05 | ○ | 0.05 | ○ | 0.05 | ○ | 0.05 | ● | 1.00 | ● | 1.00 | ● | 1.00 | ○ | 0.86 |
| TnpA transposase;Note=TnpA transposase                                                                                           | AFTH01000622.1: 2076-4409   | ○ | 0.02 | ○ | 0.02 | ○ | 0.05 | ○ | 0.02 | ● | 0.91 | ● | 1.00 | ○ | 0.43 | ○ | 0.05 |
