# Supplementary material for: Pseudomonas syringae pv. actinidiae (PSA) Isolates from Recent Bacterial Canker of Kiwifruit Outbreaks Belong to the Same Genetic Lineage
Source: PubMed Central journal article supplement (PMC3348921; doi:10.1371/journal.pone.0036518), 2012-05-09
Supplement: pone.0036518.s004.pdf [file pone.0036518.s004.pdf]

**Supplementary Table 4.** Comparison of gene content among *Psa* isolates based on aligning reads against the reference genome of *Psa* NCPPB3871 (GenBank:AFTF01000000).

| Gene                                                                                                                                                                                       | Genomic coordinates            | 346      | CFBP7285 | CFBP7286 | CFBP7287 | PsaKN.2 | Kw41   | PA459  | CH2010-5 | CH2010-6 | NCPPB2598     |
|--------------------------------------------------------------------------------------------------------------------------------------------------------------------------------------------|--------------------------------|----------|----------|----------|----------|---------|--------|--------|----------|----------|---------------|
| As predicted by RAST ( <a href="http://http://rast.nmpdr.org/">http://http://rast.nmpdr.org/</a> )                                                                                         | (GenBank accession: start-end) | Portugal | Italy    | Italy    | Italy    | Korea   | Japan  | Japan  | China    | China    | Japan (theae) |
| site-specific recombinase2C phage integrase family;Note=site-specific recombinase2C phage integrase family                                                                                 | AFTF01000284.1: 1160-2170      | ● 1.00   | ● 1.00   | ● 1.00   | ● 1.00   | ● 1.00  | ● 1.00 | ● 1.00 | ● 1.00   | ● 1.00   | ○ 0.00        |
| Serine protease;Note=Serine protease                                                                                                                                                       | AFTF01000284.1: 2148-3203      | ○ 0.08   | ○ 0.07   | ○ 0.08   | ○ 0.08   | ● 1.00  | ● 1.00 | ● 1.00 | ○ 0.08   | ○ 0.08   | ○ 0.00        |
| Long-chain-fatty-acid--CoA ligase;Ontology_term=KEGG_ENZYME:6.2.1.3;Note=Long-chain-fatty-acid--CoA ligase                                                                                 | AFTF01000280.1: 1865-4321      | ○ 0.01   | ○ 0.01   | ○ 0.01   | ○ 0.01   | ● 1.00  | ● 1.00 | ● 1.00 | ○ 0.01   | ○ 0.01   | ○ 0.01        |
| Name=titin titin;Note=titin                                                                                                                                                                | AFTF01000278.1: 882-2111       | ● 1.00   | ● 1.00   | ● 1.00   | ● 1.00   | ○ 0.00  | ● 1.00 | ● 1.00 | ● 1.00   | ● 1.00   | ● 1.00        |
| DNA polymerase III alpha subunit;Ontology_term=KEGG_ENZYME:2.7.7.7;Note=DNA polymerase III alpha subunit                                                                                   | AFTF01000278.1: 2169-2933      | ● 1.00   | ● 1.00   | ● 1.00   | ● 1.00   | ○ 0.00  | ● 1.00 | ● 1.00 | ● 1.00   | ● 1.00   | ● 0.99        |
| DNA polymerase-like protein PA0670;Note=DNA polymerase-like protein PA0670                                                                                                                 | AFTF01000278.1: 2930-4345      | ● 1.00   | ● 1.00   | ● 1.00   | ● 1.00   | ○ 0.00  | ● 1.00 | ● 1.00 | ● 1.00   | ● 1.00   | ● 1.00        |
| RecA/RadA recombinase;Note=RecA/RadA recombinase                                                                                                                                           | AFTF01000278.1: 4353-4976      | ● 1.00   | ● 1.00   | ● 1.00   | ● 1.00   | ○ 0.00  | ● 1.00 | ● 1.00 | ● 1.00   | ● 1.00   | ● 1.00        |
| SOS-response repressor and protease LexA;Ontology_term=KEGG_ENZYME:3.4.21.88;Note=SOS-response repressor                                                                                   | AFTF01000278.1: 4973-5590      | ● 1.00   | ● 1.00   | ● 1.00   | ● 1.00   | ○ 0.00  | ● 1.00 | ● 1.00 | ● 1.00   | ● 1.00   | ● 1.00        |
| FIG00961388: hypothetical protein;Note=FIG00961388: hypothetical protein                                                                                                                   | AFTF01000275.1: 1861-1980      | ● 1.00   | ● 1.00   | ● 1.00   | ● 1.00   | ● 1.00  | ● 1.00 | ● 1.00 | ● 1.00   | ● 1.00   | ○ 0.00        |
| FIG00961388: hypothetical protein;Note=FIG00961388: hypothetical protein                                                                                                                   | AFTF01000275.1: 2093-2437      | ● 1.00   | ● 1.00   | ● 1.00   | ● 1.00   | ● 1.00  | ● 1.00 | ● 1.00 | ● 1.00   | ● 1.00   | ○ 0.00        |
| hypothetical protein;Note=hypothetical protein                                                                                                                                             | AFTF01000432.1: 1709-2545      | ● 1.00   | ● 1.00   | ● 1.00   | ● 1.00   | ● 1.00  | ● 1.00 | ● 1.00 | ● 1.00   | ● 1.00   | ○ 0.00        |
| membrane protein2C putative;Note=membrane protein2C putative                                                                                                                               | AFTF01000432.1: 2671-3198      | ● 1.00   | ● 1.00   | ● 1.00   | ● 1.00   | ● 1.00  | ● 1.00 | ● 1.00 | ● 1.00   | ● 1.00   | ○ 0.00        |
| hypothetical protein;Note=hypothetical protein                                                                                                                                             | AFTF01000263.1: 1639-1782      | ● 1.00   | ● 1.00   | ● 1.00   | ● 1.00   | ○ 0.00  | ● 1.00 | ● 1.00 | ● 1.00   | ● 1.00   | ● 1.00        |
| hypothetical protein;Note=hypothetical protein                                                                                                                                             | AFTF01000263.1: 1894-2364      | ● 1.00   | ● 1.00   | ● 1.00   | ● 1.00   | ○ 0.00  | ● 1.00 | ● 1.00 | ● 1.00   | ● 1.00   | ● 1.00        |
| NreA-like protein;Note=NreA-like protein                                                                                                                                                   | AFTF01000263.1: 2593-2886      | ● 1.00   | ● 1.00   | ● 1.00   | ● 1.00   | ○ 0.00  | ● 1.00 | ● 1.00 | ● 1.00   | ● 1.00   | ● 1.00        |
| Nickel and cobalt efflux transporter rcnA;Note=Nickel and cobalt efflux transporter rcnA                                                                                                   | AFTF01000263.1: 2894-3766      | ● 1.00   | ● 1.00   | ● 1.00   | ● 1.00   | ○ 0.00  | ● 1.00 | ● 1.00 | ● 1.00   | ● 1.00   | ● 1.00        |
| Protein with ParB-like nuclease domain in PFGI-1-like cluster;Note=Protein with ParB-like nuclease domain in PFGI-1-like cluster                                                           | AFTF01000262.1: 4586-5038      | ○ 0.10   | ○ 0.13   | ○ 0.13   | ○ 0.14   | ● 1.00  | ● 1.00 | ● 1.00 | ● 0.53   | ● 0.53   | ○ 0.00        |
| Name=ORF2 ORF2;Note=ORF2                                                                                                                                                                   | AFTF01000450.1: 58-1182        | ● 1.00   | ● 1.00   | ● 1.00   | ● 1.00   | ○ 0.00  | ○ 0.19 | ● 1.00 | ● 1.00   | ● 1.00   | ○ 0.00        |
| Protein with ParB-like nuclease domain in PFGI-1-like cluster;Note=Protein with ParB-like nuclease domain in PFGI-1-like cluster                                                           | AFTF01000259.1: 58-1359        | ○ 0.05   | ○ 0.05   | ○ 0.05   | ○ 0.05   | ● 1.00  | ● 1.00 | ● 1.00 | ● 0.86   | ● 0.86   | ○ 0.03        |
| FIG004780: hypothetical protein in PFGI-1-like cluster;Note=FIG004780: hypothetical protein in PFGI-1-like cluster                                                                         | AFTF01000259.1: 1396-2133      | ○ 0.05   | ○ 0.06   | ○ 0.07   | ○ 0.07   | ● 1.00  | ● 1.00 | ● 1.00 | ● 0.96   | ● 0.96   | ○ 0.00        |
| DNA/RNA helicase in PFGI-1-like cluster;Note=DNA/RNA helicase in PFGI-1-like cluster                                                                                                       | AFTF01000259.1: 8682-10466     | ○ 0.04   | ○ 0.04   | ○ 0.05   | ○ 0.05   | ● 1.00  | ● 1.00 | ● 1.00 | ● 0.91   | ● 0.90   | ● 0.79        |
| Conjugative transfer protein PilL in PFGI-1-like cluster;Note=Conjugative transfer protein PilL in PFGI-1-like cluster                                                                     | AFTF01000259.1: 12010-13155    | ○ 0.03   | ○ 0.04   | ○ 0.04   | ○ 0.17   | ● 1.00  | ● 1.00 | ● 1.00 | ● 0.34   | ● 0.28   | ● 1.00        |
| ABC-type amino acid transport2C signal transduction systems2C periplasmic component/domain;Note=ABC-type amino acid transport2C signal transduction systems2C periplasmic component/domain | AFTF01000258.1: 1775-2530      | ○ 0.03   | ○ 0.03   | ○ 0.04   | ○ 0.04   | ● 1.00  | ● 1.00 | ● 1.00 | ○ 0.04   | ○ 0.04   | ● 1.00        |
| FIG00962378: hypothetical protein;Note=FIG00962378: hypothetical protein                                                                                                                   | AFTF01000258.1: 13738-14688    | ● 1.00   | ● 1.00   | ● 1.00   | ● 1.00   | ● 1.00  | ● 1.00 | ● 1.00 | ● 1.00   | ● 1.00   | ○ 0.00        |
| hypothetical protein;Note=hypothetical protein                                                                                                                                             | AFTF01000448.1: 2842-2976      | ● 1.00   | ● 1.00   | ● 1.00   | ● 1.00   | ● 1.00  | ● 1.00 | ● 1.00 | ● 1.00   | ● 1.00   | ○ 0.00        |
| TnpA transposase;Note=TnpA transposase                                                                                                                                                     | AFTF01000240.1: 3415-4110      | ○ 0.03   | ○ 0.02   | ○ 0.03   | ○ 0.03   | ● 1.00  | ● 1.00 | ● 1.00 | ○ 0.14   | ○ 0.14   | ○ 0.02        |
| DNA integration/recombination/inversion protein;Note=DNA integration/recombination/inversion protein                                                                                       | AFTF01000448.1: 3018-3158      | ● 1.00   | ● 1.00   | ● 1.00   | ● 1.00   | ● 1.00  | ● 1.00 | ● 1.00 | ● 1.00   | ● 1.00   | ○ 0.00        |
| FIG00960122: hypothetical protein;Note=FIG00960122: hypothetical protein                                                                                                                   | AFTF01000230.1: 718-2076       | ● 0.93   | ● 0.94   | ● 0.94   | ● 0.95   | ● 1.00  | ● 1.00 | ● 1.00 | ● 0.96   | ● 0.96   | ○ 0.00        |
| Name=Integrase Integrase;Note=Integrase                                                                                                                                                    | AFTF01000230.1: 2348-3583      | ○ 0.05   | ○ 0.05   | ○ 0.04   | ○ 0.05   | ● 1.00  | ● 1.00 | ● 1.00 | ○ 0.11   | ○ 0.11   | ○ 0.00        |
| Serine protease;Note=Serine protease                                                                                                                                                       | AFTF01000226.1: 414-2510       | ○ 0.04   | ○ 0.04   | ○ 0.06   | ○ 0.07   | ● 1.00  | ● 1.00 | ● 1.00 | ○ 0.08   | ○ 0.08   | ○ 0.07        |
| FIG00958716: hypothetical protein;Note=FIG00958716: hypothetical protein                                                                                                                   | AFTF01000226.1: 4391-4999      | ● 0.47   | ● 0.48   | ● 0.52   | ● 0.54   | ● 1.00  | ● 1.00 | ● 1.00 | ● 0.62   | ● 0.62   | ○ 0.00        |
| TonB-dependent receptor%3B Outer membrane receptor for ferrienterochelin and colicins;Note=TonB-dependent receptor                                                                         | AFTF01000225.1: 51-2450        | ○ 0.02   | ○ 0.02   | ○ 0.02   | ○ 0.02   | ● 1.00  | ● 1.00 | ● 1.00 | ○ 0.09   | ○ 0.09   | ○ 0.02        |
| Methyl-accepting chemotaxis protein;Note=Methyl-accepting chemotaxis protein                                                                                                               | AFTF01000223.1: 3245-3619      | ● 0.82   | ● 0.96   | ● 1.00   | ● 0.97   | ○ 0.00  | ○ 0.00 | ● 1.00 | ● 1.00   | ● 1.00   | ● 1.00        |
| hypothetical protein;Note=hypothetical protein                                                                                                                                             | AFTF01000223.1: 3677-5083      | ● 0.98   | ● 0.98   | ● 1.00   | ● 1.00   | ○ 0.00  | ○ 0.00 | ● 1.00 | ● 1.00   | ● 1.00   | ● 1.00        |
| Aconitase B;Note=Aconitase B                                                                                                                                                               | AFTF01000223.1: 5093-5422      | ● 1.00   | ● 1.00   | ● 1.00   | ● 1.00   | ○ 0.00  | ○ 0.16 | ● 1.00 | ● 1.00   | ● 1.00   | ● 1.00        |
| ATP-dependent helicase HrpB;Note=ATP-dependent helicase HrpB                                                                                                                               | AFTF01000222.1: 2218-4317      | ○ 0.03   | ○ 0.03   | ○ 0.03   | ○ 0.03   | ● 1.00  | ● 1.00 | ● 1.00 | ○ 0.03   | ○ 0.03   | ● 1.00        |
| hypothetical protein;Note=hypothetical protein                                                                                                                                             | AFTF01000218.1: 585-701        | ● 1.00   | ● 1.00   | ● 1.00   | ● 1.00   | ● 1.00  | ● 1.00 | ● 1.00 | ● 1.00   | ● 1.00   | ○ 0.00        |
| hypothetical protein;Note=hypothetical protein                                                                                                                                             | AFTF01000218.1: 1041-3584      | ● 0.86   | ● 0.86   | ● 0.86   | ● 0.86   | ● 1.00  | ● 1.00 | ● 1.00 | ● 0.86   | ● 0.86   | ○ 0.00        |
| Protein involved in meta-pathway of phenol degradation;Note=Protein involved in meta-pathway of phenol degradation                                                                         | AFTF01000216.1: 47276-48169    | ○ 0.04   | ○ 0.04   | ○ 0.05   | ○ 0.05   | ● 1.00  | ● 1.00 | ● 1.00 | ○ 0.05   | ○ 0.05   | ● 0.86        |
| FIG045374: Type II restriction enzyme2C methylase subunit YeeA;Note=FIG045374: Type II restriction enzyme2C methylase subunit                                                              | AFTF01000216.1: 48154-50226    | ● 1.00   | ● 1.00   | ● 1.00   | ● 1.00   | ● 1.00  | ● 1.00 | ● 1.00 | ● 1.00   | ● 1.00   | ○ 0.00        |
| hypothetical protein;Note=hypothetical protein                                                                                                                                             | AFTF01000216.1: 51011-51142    | ● 1.00   | ● 1.00   | ● 1.00   | ● 1.00   | ● 1.00  | ● 1.00 | ● 1.00 | ● 1.00   | ● 1.00   | ○ 0.00        |
| hypothetical protein;Note=hypothetical protein                                                                                                                                             | AFTF01000211.1: 1067-1186      | ● 1.00   | ● 1.00   | ● 1.00   | ● 1.00   | ● 1.00  | ● 1.00 | ● 1.00 | ● 1.00   | ● 1.00   | ○ 0.00        |
| TnpA transposase;Note=TnpA transposase                                                                                                                                                     | AFTF01000210.1: 4484-4972      | ○ 0.05   | ○ 0.05   | ○ 0.05   | ○ 0.05   | ● 1.00  | ● 1.00 | ● 1.00 | ○ 0.05   | ○ 0.05   | ● 0.32        |
| hypothetical protein;Note=hypothetical protein                                                                                                                                             | AFTF01000206.1: 10136-10399    | ● 1.00   | ● 1.00   | ● 1.00   | ● 1.00   | ● 1.00  | ● 1.00 | ● 1.00 | ● 1.00   | ● 1.00   | ○ 0.00        |
| Putative heat shock protein YegD;Note=Putative heat shock protein YegD                                                                                                                     | AFTF01000198.1: 26591-28156    | ● 1.00   | ● 1.00   | ● 1.00   | ● 1.00   | ● 1.00  | ● 1.00 | ● 1.00 | ● 1.00   | ● 1.00   | ○ 0.00        |
| hypothetical protein;Note=hypothetical protein                                                                                                                                             | AFTF01000198.1: 28706-28870    | ● 1.00   | ● 1.00   | ● 1.00   | ● 1.00   | ● 1.00  | ● 1.00 | ● 0.90 | ● 1.00   | ● 1.00   | ○ 0.00        |
| Unknown pentose utilization regulator 22C DeoR family;Note=Unknown pentose utilization regulator 22C DeoR family                                                                           | AFTF01000189.1: 30-983         | ● 0.99   | ● 0.99   | ● 0.99   | ● 0.99   | ● 1.00  | ● 1.00 | ● 1.00 | ● 1.00   | ● 1.00   | ○ 0.00        |
| 3-oxoacyl-[acyl-carrier protein] reductase;Ontology_term=KEGG_ENZYME:1.1.1.100;Note=3-oxoacyl-[acyl-carrier protein] reductase                                                             | AFTF01000189.1: 1065-1865      | ● 1.00   | ● 0.99   | ● 1.00   | ● 1.00   | ● 1.00  | ● 1.00 | ● 1.00 | ● 1.00   | ● 1.00   | ○ 0.00        |
| Short chain dehydrogenase;Note=Short chain dehydrogenase                                                                                                                                   | AFTF01000189.1: 1896-2660      | ● 1.00   | ● 1.00   | ● 1.00   | ● 1.00   | ● 1.00  | ● 1.00 | ● 1.00 | ● 1.00   | ● 1.00   | ○ 0.00        |
| D-xylose transport ATP-binding protein XylG;Note=D-xylose transport ATP-binding protein XylG                                                                                               | AFTF01000189.1: 2692-4221      | ● 1.00   | ● 0.99   | ● 1.00   | ● 1.00   | ● 1.00  | ● 1.00 | ● 1.00 | ● 1.00   | ● 1.00   | ○ 0.00        |
| Xylose ABC transporter2C periplasmic xylose-binding protein XylF;Note=Xylose ABC transporter2C periplasmic xylose-binding protein                                                          | AFTF01000189.1: 4237-5169      | ● 0.99   | ● 0.96   | ● 1.00   | ● 1.00   | ● 1.00  | ● 1.00 | ● 1.00 | ● 1.00   | ● 1.00   | ○ 0.00        |
| ribose ABC transporter2C permease protein;Note=ribose ABC transporter2C permease protein                                                                                                   | AFTF01000189.1: 5236-5658      | ● 1.00   | ● 1.00   | ● 1.00   | ● 1.00   | ● 1.00  | ● 1.00 | ● 1.00 | ● 1.00   | ● 1.00   | ○ 0.00        |
| ribose ABC transporter2C permease protein;Note=ribose ABC transporter2C permease protein                                                                                                   | AFTF01000189.1: 5659-6240      | ● 1.00   | ● 1.00   | ● 1.00   | ● 1.00   | ● 1.00  | ● 1.00 | ● 1.00 | ● 1.00   | ● 1.00   | ○ 0.00        |
| Transketolase2C N-terminal section;Ontology_term=KEGG_ENZYME:2.2.1.1;Note=Transketolase2C N-terminal section                                                                               | AFTF01000189.1: 6604-7440      | ● 1.00   | ● 0.98   | ● 1.00   | ● 1.00   | ● 1.00  | ● 1.00 | ● 1.00 | ● 1.00   | ● 1.00   | ○ 0.00        |
| Transketolase2C C-terminal section;Ontology_term=KEGG_ENZYME:2.2.1.1;Note=Transketolase2C C-terminal section                                                                               | AFTF01000189.1: 7430-8362      | ● 1.00   | ● 1.00   | ● 1.00   | ● 1.00   | ● 1.00  | ● 1.00 | ● 1.00 | ● 1.00   | ● 1.00   | ○ 0.05        |
| Unknown pentose kinase TM0952;Note=Unknown pentose kinase TM0952                                                                                                                           | AFTF01000189.1: 8375-9868      | ● 0.93   | ● 0.96   | ● 0.92   | ● 0.93   | ● 1.00  | ● 1.00 | ● 1.00 | ● 0.95   | ● 0.95   | ○ 0.01        |
| Glucans biosynthesis protein D precursor;Note=Glucans biosynthesis protein D precursor                                                                                                     | AFTF01000187.1: 22766-23083    | ● 1.00   | ● 1.00   | ● 1.00   | ● 1.00   | ● 1.00  | ● 1.00 | ● 1.00 | ● 1.00   | ● 1.00   | ○ 0.00        |
| putative integrase protein;Note=putative integrase protein                                                                                                                                 | AFTF01000444.1: 482-2140       | ● 1.00   | ● 1.00   | ● 1.00   | ● 1.00   | ○ 0.00  | ○ 0.14 | ● 1.00 | ● 1.00   | ● 1.00   | ● 1.00        |
| avirulence protein;Note=avirulence protein                                                                                                                                                 | AFTF01000184.1: 16557-17003    | ● 1.00   | ● 1.00   | ● 1.00   | ● 1.00   | ● 1.00  | ● 1.00 | ● 1.00 | ● 1.00   | ● 1.00   | ○ 0.00        |
| hypothetical protein;Note=hypothetical protein                                                                                                                                             | AFTF01000444.1: 2207-2347      | ● 1.00   | ● 1.00   | ● 1.00   | ● 1.00   | ○ 0.00  | ○ 0.43 | ● 1.00 | ● 1.00   | ● 1.00   | ● 1.00        |
| FIG00635470: hypothetical protein;Note=FIG00635470: hypothetical protein                                                                                                                   | AFTF01000178.1: 21173-22069    | ● 1.00   | ● 1.00   | ● 1.00   | ● 1.00   | ● 1.00  | ● 1.00 | ● 1.00 | ● 1.00   | ● 1.00   | ○ 0.00        |

**Supplementary Table 4.** Comparison of gene content among *Psa* isolates based on aligning reads against the reference genome of *Psa* NCPPB3871 (GenBank:AFTF01000000).

|                                                                                                                   |                             |   |      |   |      |   |      |   |      |   |      |   |      |   |      |   |      |
|-------------------------------------------------------------------------------------------------------------------|-----------------------------|---|------|---|------|---|------|---|------|---|------|---|------|---|------|---|------|
| FIG00962025: hypothetical protein;Note=FIG00962025: hypothetical protein                                          | AFTF01000174.1: 669-830     | ● | 1.00 | ● | 1.00 | ● | 1.00 | ● | 1.00 | ● | 1.00 | ● | 1.00 | ● | 1.00 | ○ | 0.00 |
| Glutamate transport membrane-spanning protein;Note=Glutamate transport membrane-spanning protein                  | AFTF01000174.1: 1135-1800   | ● | 1.00 | ● | 1.00 | ● | 1.00 | ● | 1.00 | ● | 1.00 | ● | 1.00 | ● | 1.00 | ○ | 0.00 |
| Glutamate transport membrane-spanning protein;Note=Glutamate transport membrane-spanning protein                  | AFTF01000174.1: 1781-2440   | ● | 1.00 | ● | 1.00 | ● | 1.00 | ● | 1.00 | ● | 1.00 | ● | 1.00 | ● | 1.00 | ○ | 0.00 |
| ABC-type amino acid transport/signal transduction systems2C periplasmic component/domain;Note=ABC-type            | AFTF01000174.1: 3195-3761   | ● | 1.00 | ● | 1.00 | ● | 1.00 | ● | 1.00 | ● | 1.00 | ● | 1.00 | ● | 1.00 | ○ | 0.00 |
| ABC-type amino acid transport/signal transduction systems2C periplasmic component/domain;Note=ABC-type            | AFTF01000174.1: 3816-4067   | ● | 1.00 | ● | 1.00 | ● | 1.00 | ● | 1.00 | ● | 1.00 | ● | 1.00 | ● | 1.00 | ○ | 0.00 |
| NADH:flavin oxidoreductases2C Old Yellow Enzyme family;Note=NADH:flavin oxidoreductases2C Old Yellow En           | AFTF01000174.1: 5172-6269   | ● | 1.00 | ● | 1.00 | ● | 1.00 | ● | 1.00 | ● | 1.00 | ● | 1.00 | ● | 1.00 | ○ | 0.00 |
| hypothetical protein;Note=hypothetical protein                                                                    | AFTF01000174.1: 6247-6942   | ● | 1.00 | ● | 1.00 | ● | 1.00 | ● | 1.00 | ● | 1.00 | ● | 1.00 | ● | 1.00 | ○ | 0.00 |
| Permeases of the major facilitator superfamily;Note=Permeases of the major facilitator superfamily                | AFTF01000174.1: 7003-7389   | ● | 1.00 | ● | 1.00 | ● | 1.00 | ● | 1.00 | ● | 1.00 | ● | 1.00 | ● | 1.00 | ○ | 0.00 |
| NADH:flavin oxidoreductases2C Old Yellow Enzyme family;Note=NADH:flavin oxidoreductases2C Old Yellow En           | AFTF01000174.1: 7447-8115   | ● | 1.00 | ● | 1.00 | ● | 1.00 | ● | 1.00 | ● | 1.00 | ● | 1.00 | ● | 1.00 | ○ | 0.00 |
| NADH:flavin oxidoreductases2C Old Yellow Enzyme family;Note=NADH:flavin oxidoreductases2C Old Yellow En           | AFTF01000174.1: 8156-8557   | ● | 0.65 | ● | 0.64 | ● | 0.65 | ● | 0.65 | ● | 1.00 | ● | 1.00 | ● | 0.66 | ○ | 0.66 |
| Transcriptional regulator2C TetR family;Note=Transcriptional regulator2C TetR family                              | AFTF01000174.1: 8613-9194   | ● | 0.99 | ● | 1.00 | ● | 1.00 | ● | 1.00 | ● | 1.00 | ● | 1.00 | ● | 1.00 | ○ | 0.00 |
| hypothetical protein;Note=hypothetical protein                                                                    | AFTF01000174.1: 10309-10488 | ● | 1.00 | ● | 1.00 | ● | 1.00 | ● | 1.00 | ● | 1.00 | ● | 1.00 | ● | 1.00 | ○ | 0.00 |
| transcriptional regulator2C AraC family;Note=transcriptional regulator2C AraC family                              | AFTF01000174.1: 10698-11681 | ● | 1.00 | ● | 1.00 | ● | 1.00 | ● | 1.00 | ● | 1.00 | ● | 1.00 | ● | 1.00 | ○ | 0.01 |
| ABC-type polar amino acid transport system2C ATPase component;Note=ABC-type polar amino acid transport            | AFTF01000169.1: 50794-51591 | ● | 1.00 | ● | 1.00 | ● | 1.00 | ● | 1.00 | ● | 1.00 | ● | 1.00 | ● | 1.00 | ○ | 0.01 |
| ABC-type amino acid transport/signal transduction systems2C periplasmic component/domain;Note=ABC-type            | AFTF01000169.1: 52973-53326 | ● | 1.00 | ● | 1.00 | ● | 1.00 | ● | 1.00 | ● | 1.00 | ● | 1.00 | ● | 1.00 | ○ | 0.00 |
| ABC-type amino acid transport/signal transduction systems2C periplasmic component/domain;Note=ABC-type            | AFTF01000169.1: 53545-53844 | ● | 1.00 | ● | 1.00 | ● | 1.00 | ● | 1.00 | ● | 1.00 | ● | 1.00 | ● | 1.00 | ○ | 0.00 |
| avirulence protein;Note=avirulence protein                                                                        | AFTF01000442.1: 1060-2079   | ● | 1.00 | ● | 1.00 | ● | 1.00 | ○ | 0.00 | ○ | 0.08 | ● | 1.00 | ● | 1.00 | ○ | 0.00 |
| hypothetical protein;Note=hypothetical protein                                                                    | AFTF01000442.1: 2764-2886   | ● | 1.00 | ● | 1.00 | ● | 1.00 | ○ | 0.00 | ○ | 0.00 | ● | 1.00 | ● | 1.00 | ○ | 0.00 |
| hypothetical protein;Note=hypothetical protein                                                                    | AFTF01000442.1: 3287-3445   | ● | 1.00 | ● | 1.00 | ● | 1.00 | ○ | 0.00 | ○ | 0.00 | ● | 1.00 | ● | 1.00 | ○ | 0.00 |
| Putative large exoprotein involved in heme utilization or adhesion of ShlA/HecA/FhaA family;Note=Putative larg    | AFTF01000159.1: 28-11799    | ● | 0.99 | ● | 0.99 | ● | 0.99 | ○ | 0.00 | ○ | 1.00 | ● | 1.00 | ● | 1.00 | ● | 0.99 |
| Cellulose synthase operon protein C;Note=Cellulose synthase operon protein C                                      | AFTF01000158.1: 38043-41858 | ● | 0.57 | ● | 0.57 | ● | 0.57 | ● | 1.00 | ● | 1.00 | ● | 1.00 | ● | 0.57 | ○ | 0.57 |
| Name=transposase transposase;Note=transposase                                                                     | AFTF01000442.1: 3435-3845   | ● | 1.00 | ● | 1.00 | ● | 1.00 | ○ | 0.00 | ○ | 0.00 | ● | 1.00 | ● | 1.00 | ○ | 0.00 |
| YoeB toxin protein;Note=YoeB toxin protein                                                                        | AFTF01000154.1: 15016-15318 | ● | 1.00 | ● | 1.00 | ● | 1.00 | ● | 1.00 | ● | 1.00 | ● | 1.00 | ● | 1.00 | ○ | 0.00 |
| Endoglucanase precursor;Ontology_term=KEGG_ENZYME:3.2.1.4;Note=Endoglucanase precursor;Ontology_ter               | AFTF01000137.1: 44172-45206 | ● | 1.00 | ● | 1.00 | ● | 1.00 | ● | 1.00 | ● | 1.00 | ● | 1.00 | ● | 1.00 | ○ | 0.05 |
| Transposase and inactivated derivatives;Note=Transposase and inactivated derivatives                              | AFTF01000128.1: 74-1123     | ○ | 0.03 | ○ | 0.03 | ○ | 0.03 | ○ | 0.03 | ○ | 0.03 | ○ | 0.03 | ○ | 0.03 | ○ | 0.03 |
| FIG00965780: hypothetical protein;Note=FIG00965780: hypothetical protein                                          | AFTF01000085.1: 19-573      | ● | 1.00 | ● | 1.00 | ● | 1.00 | ● | 1.00 | ● | 1.00 | ● | 1.00 | ● | 1.00 | ○ | 0.00 |
| FIG00965780: hypothetical protein;Note=FIG00965780: hypothetical protein                                          | AFTF01000077.1: 195-1148    | ● | 1.00 | ● | 1.00 | ● | 1.00 | ● | 1.00 | ● | 1.00 | ● | 1.00 | ● | 1.00 | ○ | 0.00 |
| VgrG protein;Note=VgrG protein                                                                                    | AFTF01000077.1: 1112-4426   | ● | 1.00 | ● | 1.00 | ● | 1.00 | ● | 1.00 | ● | 1.00 | ● | 1.00 | ● | 1.00 | ○ | 0.02 |
| VgrG protein;Note=VgrG protein                                                                                    | AFTF01000077.1: 5271-7298   | ● | 1.00 | ● | 1.00 | ● | 1.00 | ● | 1.00 | ● | 1.00 | ● | 1.00 | ● | 1.00 | ○ | 0.04 |
| Yersinia/Haemophilus virulence surface antigen family;Note=Yersinia/Haemophilus virulence surface antigen fa      | AFTF01000074.1: 446-1519    | ● | 1.00 | ● | 1.00 | ● | 1.00 | ○ | 0.00 | ○ | 0.09 | ● | 1.00 | ● | 1.00 | ● | 1.00 |
| hypothetical protein;Note=hypothetical protein                                                                    | AFTF01000074.1: 1742-1936   | ● | 1.00 | ● | 1.00 | ● | 1.00 | ○ | 0.00 | ○ | 0.00 | ● | 1.00 | ● | 1.00 | ○ | 0.00 |
| type III effector AvrB4-2;Note=type III effector AvrB4-2                                                          | AFTF01000074.1: 2464-3426   | ● | 1.00 | ● | 1.00 | ● | 1.00 | ○ | 0.00 | ○ | 0.15 | ● | 1.00 | ● | 1.00 | ○ | 0.14 |
| Name=transposase transposase;Note=transposase                                                                     | AFTF01000072.1: 324-548     | ● | 0.36 | ● | 0.35 | ● | 0.36 | ● | 1.00 | ● | 1.00 | ● | 1.00 | ● | 0.37 | ○ | 0.37 |
| Dipeptide-binding ABC transporter2C periplasmic substrate-binding component (TC 3.A.1.5.2);Note=Dipeptide-        | AFTF01000072.1: 571-789     | ● | 1.00 | ● | 1.00 | ● | 1.00 | ● | 1.00 | ● | 1.00 | ● | 1.00 | ● | 1.00 | ○ | 0.00 |
| hypothetical protein;Note=hypothetical protein                                                                    | AFTF01000072.1: 2423-2698   | ● | 1.00 | ● | 1.00 | ● | 1.00 | ● | 1.00 | ● | 1.00 | ● | 1.00 | ● | 1.00 | ○ | 0.00 |
| MFS general substrate transporter;Note=MFS general substrate transporter                                          | AFTF01000072.1: 2721-3983   | ● | 1.00 | ● | 1.00 | ● | 1.00 | ● | 1.00 | ● | 1.00 | ● | 1.00 | ● | 1.00 | ○ | 0.00 |
| FIG00967211: hypothetical protein;Note=FIG00967211: hypothetical protein                                          | AFTF01000069.1: 12758-13327 | ● | 1.00 | ● | 1.00 | ● | 1.00 | ● | 1.00 | ● | 1.00 | ● | 1.00 | ● | 1.00 | ○ | 0.00 |
| ATP binding protein;Note=ATP binding protein                                                                      | AFTF01000069.1: 13477-14832 | ● | 1.00 | ● | 1.00 | ● | 1.00 | ● | 1.00 | ● | 1.00 | ● | 1.00 | ● | 1.00 | ○ | 0.00 |
| Sucrose specific transcriptional regulator CscR2C LacI family;Note=Sucrose specific transcriptional regulator Csc | AFTF01000068.1: 209-1156    | ● | 1.00 | ● | 1.00 | ● | 1.00 | ○ | 0.00 | ○ | 1.00 | ● | 1.00 | ● | 1.00 | ● | 1.00 |
| Transducer protein car;Note=Transducer protein car                                                                | AFTF01000068.1: 1275-6983   | ● | 1.00 | ● | 1.00 | ● | 1.00 | ○ | 0.00 | ○ | 1.00 | ● | 1.00 | ● | 1.00 | ● | 1.00 |
| hypothetical protein;Note=hypothetical protein                                                                    | AFTF01000060.1: 1225-1575   | ● | 1.00 | ● | 1.00 | ● | 1.00 | ● | 1.00 | ● | 1.00 | ● | 1.00 | ● | 1.00 | ○ | 0.00 |
| hypothetical protein;Note=hypothetical protein                                                                    | AFTF01000060.1: 1526-1666   | ● | 1.00 | ● | 1.00 | ● | 1.00 | ● | 1.00 | ● | 1.00 | ● | 1.00 | ● | 1.00 | ○ | 0.00 |
| FIG00963107: hypothetical protein;Note=FIG00963107: hypothetical protein                                          | AFTF01000409.1: 37033-38406 | ● | 1.00 | ● | 1.00 | ● | 1.00 | ● | 1.00 | ● | 1.00 | ● | 1.00 | ● | 1.00 | ○ | 0.00 |
| candidate type III effector HolPtoQ;Note=candidate type III effector HolPtoQ                                      | AFTF01000060.1: 3106-4449   | ● | 1.00 | ● | 1.00 | ● | 1.00 | ● | 1.00 | ● | 1.00 | ● | 1.00 | ● | 1.00 | ○ | 0.00 |
| IS1294 orf;Note=IS1294 orf                                                                                        | AFTF01000060.1: 4796-5923   | ○ | 0.20 | ○ | 0.18 | ○ | 0.20 | ○ | 0.20 | ○ | 0.20 | ○ | 0.20 | ○ | 0.20 | ○ | 0.20 |
| Transcriptional regulator2C LysR family;Note=Transcriptional regulator2C LysR family                              | AFTF01000059.1: 38238-39137 | ● | 1.00 | ● | 1.00 | ● | 1.00 | ● | 1.00 | ● | 1.00 | ● | 1.00 | ● | 1.00 | ○ | 0.00 |
| FIG00966512: hypothetical protein;Note=FIG00966512: hypothetical protein                                          | AFTF01000050.1: 2748-3461   | ○ | 0.02 | ○ | 0.03 | ○ | 0.02 | ○ | 0.03 | ○ | 0.03 | ○ | 0.03 | ○ | 0.03 | ○ | 0.96 |
| hypothetical protein;Note=hypothetical protein                                                                    | AFTF01000041.1: 40721-41539 | ● | 1.00 | ● | 1.00 | ● | 1.00 | ● | 1.00 | ● | 1.00 | ● | 1.00 | ● | 1.00 | ○ | 0.00 |
| Dipeptide-binding ABC transporter2C periplasmic substrate-binding component (TC 3.A.1.5.2);Note=Dipeptide-        | AFTF01000034.1: 561-2138    | ● | 1.00 | ● | 1.00 | ● | 1.00 | ● | 1.00 | ● | 1.00 | ● | 1.00 | ● | 1.00 | ○ | 0.00 |
| Dipeptide transport system permease protein DppB (TC 3.A.1.5.2)%3B putative hemin permease;Note=Dipeptid          | AFTF01000034.1: 2159-3169   | ● | 1.00 | ● | 1.00 | ● | 1.00 | ● | 1.00 | ● | 1.00 | ● | 1.00 | ● | 1.00 | ○ | 0.00 |
| Dipeptide transport system permease protein DppC (TC 3.A.1.5.2);Note=Dipeptide transport system permease          | AFTF01000034.1: 3166-4017   | ● | 1.00 | ● | 1.00 | ● | 1.00 | ● | 1.00 | ● | 1.00 | ● | 1.00 | ● | 1.00 | ○ | 0.00 |
| Dipeptide transport ATP-binding protein DppD (TC 3.A.1.5.2);Note=Dipeptide transport ATP-binding protein Dp       | AFTF01000034.1: 4010-4858   | ● | 1.00 | ● | 1.00 | ● | 1.00 | ● | 1.00 | ● | 1.00 | ● | 1.00 | ● | 1.00 | ○ | 0.00 |
| dipeptide ABC transporter2C ATP binding protein;Note=dipeptide ABC transporter2C ATP binding protein              | AFTF01000034.1: 4855-5568   | ● | 1.00 | ● | 1.00 | ● | 1.00 | ● | 1.00 | ● | 1.00 | ● | 1.00 | ● | 1.00 | ○ | 0.00 |
| Cytochrome B561;Note=Cytochrome B561                                                                              | AFTF01000034.1: 5673-6230   | ● | 1.00 | ● | 1.00 | ● | 1.00 | ● | 1.00 | ● | 1.00 | ● | 1.00 | ● | 1.00 | ○ | 0.00 |
| transmembrane sensor2C putative;Note=transmembrane sensor2C putative                                              | AFTF01000034.1: 8365-9330   | ● | 1.00 | ● | 1.00 | ● | 1.00 | ● | 1.00 | ● | 1.00 | ● | 1.00 | ● | 1.00 | ○ | 0.00 |
| TonB-dependent ferric achromobactin receptor protein;Note=TonB-dependent ferric achromobactin receptor            | AFTF01000034.1: 9400-11802  | ● | 1.00 | ● | 1.00 | ● | 1.00 | ● | 1.00 | ● | 1.00 | ● | 1.00 | ● | 1.00 | ○ | 0.00 |
| Shufflon-specific DNA recombinase;Note=Shufflon-specific DNA recombinase                                          | AFTF01000033.1: 33940-34917 | ● | 1.00 | ● | 1.00 | ● | 1.00 | ● | 1.00 | ● | 1.00 | ● | 1.00 | ● | 1.00 | ○ | 0.00 |
| hypothetical protein;Note=hypothetical protein                                                                    | AFTF01000033.1: 34914-35159 | ● | 1.00 | ● | 1.00 | ● | 1.00 | ● | 1.00 | ● | 1.00 | ● | 1.00 | ● | 1.00 | ○ | 0.00 |
| hypothetical protein;Note=hypothetical protein                                                                    | AFTF01000032.1: 13190-13327 | ● | 1.00 | ● | 1.00 | ● | 1.00 | ● | 1.00 | ● | 1.00 | ● | 1.00 | ● | 1.00 | ○ | 0.00 |
| hypothetical protein;Note=hypothetical protein                                                                    | AFTF01000032.1: 37506-37766 | ● | 1.00 | ● | 1.00 | ● | 1.00 | ● | 1.00 | ● | 1.00 | ● | 1.00 | ● | 1.00 | ○ | 0.00 |
| Name=Levansucrase;Ontology_term=KEGG_ENZYME:2.4.1.10;Note=Levansucrase Levansucrase;Ontology_term                 | AFTF01000031.1: 2809-4104   | ● | 1.00 | ● | 1.00 | ● | 1.00 | ● | 1.00 | ● | 1.00 | ● | 1.00 | ● | 1.00 | ○ | 0.00 |
| ParA family protein;Note=ParA family protein                                                                      | AFTF01000031.1: 17825-18412 | ● | 1.00 | ● | 1.00 | ● | 1.00 | ● | 1.00 | ● |      |   |      |   |      |   |      |

**Supplementary Table 4.** Comparison of gene content among *Psa* isolates based on aligning reads against the reference genome of *Psa* NCPPB3871 (GenBank:AFTF01000000).

|                                                                                                                |                             |   |      |   |      |   |      |   |      |   |      |   |      |   |      |   |      |
|----------------------------------------------------------------------------------------------------------------|-----------------------------|---|------|---|------|---|------|---|------|---|------|---|------|---|------|---|------|
| conserved effector locus protein;Note=conserved effector locus protein                                         | AFTF01000028.1: 53076-53414 | ● | 1.00 | ● | 1.00 | ● | 1.00 | ● | 1.00 | ● | 1.00 | ● | 1.00 | ● | 1.00 | ○ | 0.00 |
| type III effector HopN1;Note=type III effector HopN1                                                           | AFTF01000028.1: 53428-54480 | ● | 1.00 | ● | 1.00 | ● | 1.00 | ● | 1.00 | ● | 1.00 | ● | 1.00 | ● | 1.00 | ○ | 0.00 |
| FIG00955995: hypothetical protein;Note=FIG00955995: hypothetical protein                                       | AFTF01000026.1: 10075-10281 | ● | 1.00 | ● | 1.00 | ● | 1.00 | ● | 1.00 | ● | 1.00 | ● | 1.00 | ● | 1.00 | ○ | 0.00 |
| 3-oxoacyl-[acyl-carrier protein] reductase;Ontology_term=KEGG_ENZYME:1.1.1.100;Note=3-oxoacyl-[acyl-carri      | AFTF01000026.1: 10336-11097 | ● | 1.00 | ● | 1.00 | ● | 1.00 | ● | 1.00 | ● | 1.00 | ● | 1.00 | ● | 1.00 | ○ | 0.00 |
| bacterial transferase2C hexapeptide repeat protein;Note=bacterial transferase2C hexapeptide repeat protein     | AFTF01000026.1: 11109-11735 | ● | 1.00 | ● | 1.00 | ● | 1.00 | ● | 1.00 | ● | 1.00 | ● | 1.00 | ● | 1.00 | ○ | 0.00 |
| 3-oxoacyl-[acyl-carrier-protein] synthase2C KASIII;Ontology_term=KEGG_ENZYME:2.3.1.41;Note=3-oxoacyl-[ac       | AFTF01000026.1: 11762-12757 | ● | 1.00 | ● | 1.00 | ● | 1.00 | ● | 1.00 | ● | 1.00 | ● | 1.00 | ● | 1.00 | ○ | 0.00 |
| major facilitator family transporter;Note=major facilitator family transporter                                 | AFTF01000026.1: 12800-13771 | ● | 1.00 | ● | 1.00 | ● | 1.00 | ● | 1.00 | ● | 1.00 | ● | 1.00 | ● | 1.00 | ○ | 0.00 |
| hypothetical protein;Note=hypothetical protein                                                                 | AFTF01000008.1: 1289-1480   | ○ | 0.28 | ○ | 0.27 | ○ | 0.28 | ○ | 0.28 | ○ | 1.00 | ○ | 1.00 | ○ | 0.67 | ○ | 0.67 |
| NAD-dependent protein deacetylase of SIR2 family;Note=NAD-dependent protein deacetylase of SIR2 family         | AFTF01000397.1: 335-553     | ● | 1.00 | ● | 1.00 | ● | 1.00 | ● | 1.00 | ● | 1.00 | ● | 1.00 | ● | 1.00 | ○ | 0.00 |
| Hemolysin activator protein precursor;Note=Hemolysin activator protein precursor                               | AFTF01000397.1: 1944-3524   | ● | 1.00 | ● | 1.00 | ● | 1.00 | ● | 1.00 | ● | 1.00 | ● | 1.00 | ● | 1.00 | ○ | 0.05 |
| Putative large exoprotein involved in heme utilization or adhesion of ShlA/HecA/FhaA family;Note=Putative larg | AFTF01000397.1: 3549-12383  | ● | 1.00 | ● | 1.00 | ● | 1.00 | ● | 1.00 | ● | 1.00 | ● | 1.00 | ● | 1.00 | ○ | 0.02 |
| Error-prone2C lesion bypass DNA polymerase V (UmuC);Note=Error-prone2C lesion bypass DNA polymerase V          | AFTF01000396.1: 3594-3842   | ○ | 0.01 | ○ | 0.00 | ○ | 0.02 | ○ | 0.02 | ● | 1.00 | ● | 1.00 | ● | 1.00 | ○ | 0.31 |
| Uncharacterized protein ImpA;Note=Uncharacterized protein ImpA                                                 | AFTF01000359.1: 434-1765    | ○ | 0.04 | ○ | 0.04 | ○ | 0.05 | ○ | 0.05 | ● | 1.00 | ● | 1.00 | ● | 1.00 | ○ | 0.10 |
| hypothetical protein;Note=hypothetical protein                                                                 | AFTF01000358.1: 20-145      | ○ | 0.55 | ○ | 0.60 | ○ | 0.56 | ○ | 0.72 | ● | 1.00 | ● | 1.00 | ● | 1.00 | ○ | 0.72 |
| transcriptional regulator2C LysR family;Note=transcriptional regulator2C LysR family                           | AFTF01000356.1: 252-1076    | ● | 1.00 | ● | 1.00 | ● | 1.00 | ● | 1.00 | ○ | 0.00 | ● | 1.00 | ● | 1.00 | ● | 1.00 |
| FIG00954449: hypothetical protein;Note=FIG00954449: hypothetical protein                                       | AFTF01000356.1: 1216-3966   | ● | 1.00 | ● | 1.00 | ● | 1.00 | ● | 1.00 | ○ | 0.00 | ● | 1.00 | ● | 1.00 | ● | 1.00 |
| hypothetical protein;Note=hypothetical protein                                                                 | AFTF01000353.1: 446-619     | ○ | 0.59 | ○ | 0.58 | ○ | 0.59 | ○ | 0.60 | ● | 1.00 | ● | 1.00 | ● | 1.00 | ○ | 0.59 |
| hypothetical protein;Note=hypothetical protein                                                                 | AFTF01000352.1: 84-566      | ○ | 0.06 | ○ | 0.05 | ○ | 0.06 | ○ | 0.06 | ● | 1.00 | ● | 1.00 | ● | 1.00 | ○ | 0.05 |
| hypothetical protein;Note=hypothetical protein                                                                 | AFTF01000348.1: 24-437      | ○ | 0.53 | ○ | 0.61 | ○ | 0.70 | ○ | 0.72 | ○ | 0.20 | ● | 1.00 | ○ | 0.20 | ○ | 0.82 |
| TRAP-type C4-dicarboxylate transport system2C periplasmic component;Note=TRAP-type C4-dicarboxylate trar       | AFTF01000344.1: 1185-1697   | ○ | 0.04 | ○ | 0.05 | ○ | 0.05 | ○ | 0.05 | ● | 1.00 | ● | 1.00 | ● | 1.00 | ○ | 0.14 |
| hypothetical protein;Note=hypothetical protein                                                                 | AFTF01000343.1: 1524-2936   | ○ | 0.01 | ○ | 0.01 | ○ | 0.02 | ○ | 0.02 | ● | 1.00 | ● | 1.00 | ● | 1.00 | ○ | 0.12 |
| hypothetical protein;Note=hypothetical protein                                                                 | AFTF01000340.1: 77-262      | ○ | 0.02 | ○ | 0.13 | ○ | 0.10 | ○ | 0.12 | ○ | 0.24 | ● | 1.00 | ● | 1.00 | ○ | 0.18 |
| Two-component response regulator;Note=Two-component response regulator                                         | AFTF01000336.1: 150-1655    | ● | 1.00 | ● | 1.00 | ● | 1.00 | ● | 1.00 | ● | 1.00 | ● | 1.00 | ● | 1.00 | ○ | 0.00 |
| ATP-dependent helicase HrpB;Note=ATP-dependent helicase HrpB                                                   | AFTF01000330.1: 1092-2456   | ○ | 0.62 | ○ | 0.62 | ○ | 0.62 | ○ | 0.62 | ● | 1.00 | ● | 1.00 | ● | 1.00 | ○ | 0.68 |
| FIG00953710: hypothetical protein;Note=FIG00953710: hypothetical protein                                       | AFTF01000329.1: 1083-1343   | ○ | 0.07 | ○ | 0.04 | ○ | 0.07 | ○ | 0.10 | ○ | 0.10 | ● | 1.00 | ● | 1.00 | ○ | 0.11 |
| hypothetical protein;Note=hypothetical protein                                                                 | AFTF01000322.1: 2533-3027   | ● | 1.00 | ● | 1.00 | ● | 1.00 | ● | 1.00 | ● | 1.00 | ● | 1.00 | ● | 1.00 | ○ | 0.03 |
| FIG00454553: hypothetical protein;Note=FIG00454553: hypothetical protein                                       | AFTF01000316.1: 113-3364    | ○ | 0.01 | ○ | 0.01 | ○ | 0.01 | ○ | 0.01 | ● | 1.00 | ● | 1.00 | ● | 1.00 | ○ | 0.05 |
| hypothetical protein;Note=hypothetical protein                                                                 | AFTF01000313.1: 1289-1501   | ● | 1.00 | ● | 1.00 | ● | 1.00 | ● | 1.00 | ○ | 0.00 | ○ | 0.00 | ● | 1.00 | ○ | 0.00 |
| FIG00955572: hypothetical protein;Note=FIG00955572: hypothetical protein                                       | AFTF01000307.1: 760-2493    | ○ | 0.01 | ○ | 0.01 | ○ | 0.05 | ○ | 0.01 | ● | 1.00 | ● | 1.00 | ● | 1.00 | ○ | 0.02 |
| Name=Integrase Integrase;Note=Integrase                                                                        | AFTF01000305.1: 109-1419    | ○ | 0.00 | ○ | 0.00 | ○ | 0.01 | ○ | 0.01 | ● | 0.87 | ● | 1.00 | ○ | 0.00 | ○ | 0.01 |
| SanC2C putative;Note=SanC2C putative                                                                           | AFTF01000299.1: 665-1036    | ● | 1.00 | ● | 1.00 | ● | 1.00 | ● | 1.00 | ● | 1.00 | ● | 1.00 | ● | 1.00 | ○ | 0.00 |
| FIG00959382: hypothetical protein;Note=FIG00959382: hypothetical protein                                       | AFTF01000299.1: 3653-4573   | ● | 1.00 | ● | 1.00 | ● | 1.00 | ● | 1.00 | ● | 1.00 | ● | 1.00 | ● | 1.00 | ○ | 0.00 |
| plasmid stability protein StbB;Note=plasmid stability protein StbB                                             | AFTF01000299.1: 6937-7083   | ● | 1.00 | ● | 1.00 | ● | 1.00 | ● | 1.00 | ● | 1.00 | ● | 1.00 | ● | 1.00 | ○ | 0.00 |
| plasmid stability protein StbC;Note=plasmid stability protein StbC                                             | AFTF01000299.1: 7080-7202   | ● | 1.00 | ● | 1.00 | ● | 1.00 | ● | 1.00 | ● | 1.00 | ● | 1.00 | ● | 1.00 | ○ | 0.00 |
