# Supplementary material for: Pseudomonas syringae pv. actinidiae (PSA) Isolates from Recent Bacterial Canker of Kiwifruit Outbreaks Belong to the Same Genetic Lineage
Source: PubMed Central journal article supplement (PMC3348921; doi:10.1371/journal.pone.0036518), 2012-05-09
Supplement: pone.0036518.s005.pdf [file pone.0036518.s005.pdf]

**Supplementary Table 5.** Gene contents of isolates CFBP7286 (Europe) and CH2010-6 (China) in the region of the PPHGI-1-like island based on aligning reads against the reference genome of *Psa* MAFF302091.

| Gene                                                                                                    | Location in MAFF 302091<br>(GenBank accession: start-end) | CFBP7286 |             | CH2010-6 |             |
|---------------------------------------------------------------------------------------------------------|-----------------------------------------------------------|----------|-------------|----------|-------------|
|                                                                                                         |                                                           | Italy    | China       | Italy    | China       |
| <b>As predicted by RAST (<a href="http://http://rast.nmpdr.org/">http://http://rast.nmpdr.org/</a>)</b> |                                                           |          |             |          |             |
| RlgA                                                                                                    | AEAL01000941.1: 166-546                                   | ●        | 1.00        | ●        | 1.00        |
| transcriptional regulator2C LysR family                                                                 | AEAL01000643.1: 2894-3718                                 | ●        | 1.00        | ●        | 1.00        |
| Transposase                                                                                             | AEAL01000934.1: 47-238                                    | ◐        | 0.28        | ◐        | 0.67        |
| TonB-dependent ferric achromobactin receptor protein                                                    | AEAL01000447.1: 6907-9309                                 | ●        | 1.00        | ●        | 1.00        |
| transmembrane sensor2C putative                                                                         | AEAL01000447.1: 9379-10344                                | ●        | 1.00        | ●        | 1.00        |
| Cytochrome B561                                                                                         | AEAL01000447.1: 12479-13036                               | ●        | 1.00        | ●        | 1.00        |
| Putative glutathione transporter2C ATP-binding component                                                | AEAL01000447.1: 13141-13854                               | ●        | 1.00        | ●        | 1.00        |
| Dipeptide transport ATP-binding protein DppD (TC 3.A.1.5.2)                                             | AEAL01000447.1: 13851-14699                               | ●        | 1.00        | ●        | 1.00        |
| Dipeptide transport system permease protein DppC (TC 3.A.1.5.2)                                         | AEAL01000447.1: 14692-15543                               | ●        | 1.00        | ●        | 1.00        |
| Dipeptide transport system permease protein DppB (TC 3.A.1.5.2)%3B putative                             | AEAL01000447.1: 15540-16550                               | ●        | 1.00        | ●        | 1.00        |
| Dipeptide-binding ABC transporter2C periplasmic substrate-binding component                             | AEAL01000447.1: 16571-18148                               | ●        | 1.00        | ●        | 1.00        |
| avirulence protein                                                                                      | AEAL01000419.1: 368-1387                                  | ●        | 1.00        | ●        | 1.00        |
| hypothetical protein                                                                                    | AEAL01000419.1: 2072-2215                                 | ●        | 1.00        | ●        | 1.00        |
| hypothetical protein                                                                                    | AEAL01000419.1: 2595-2753                                 | ●        | 1.00        | ●        | 1.00        |
| transposase                                                                                             | AEAL01000419.1: 2743-3153                                 | ●        | 1.00        | ●        | 1.00        |
| hypothetical protein                                                                                    | AEAL01000419.1: 3112-3285                                 | ●        | 1.00        | ●        | 1.00        |
| hypothetical protein                                                                                    | AEAL01000418.1: 816-1028                                  | ●        | 1.00        | ●        | 1.00        |
| Methyl-accepting chemotaxis protein                                                                     | AEAL01000416.1: 643-1017                                  | ●        | 1.00        | ●        | 1.00        |
| putative DNA helicase                                                                                   | AEAL01000416.1: 1075-2481                                 | ●        | 1.00        | ●        | 1.00        |
| Aconitase B                                                                                             | AEAL01000416.1: 2491-2820                                 | ●        | 1.00        | ●        | 1.00        |
| hypothetical protein                                                                                    | AEAL01000415.1: 1052-1213                                 | ●        | 0.96        | ●        | 0.97        |
| Sucrose specific transcriptional regulator Cscr2C LacI family                                           | AEAL01000414.1: 80-1075                                   | ●        | 1.00        | ●        | 1.00        |
| Transducer protein car                                                                                  | AEAL01000414.1: 1194-6902                                 | ●        | 1.00        | ●        | 1.00        |
| transposase                                                                                             | AEAL01000413.1: 44-250                                    | ●        | 1.00        | ●        | 1.00        |
| macrolide-efflux protein                                                                                | AEAL01000413.1: 558-1820                                  | ●        | 1.00        | ●        | 1.00        |
| hypothetical protein                                                                                    | AEAL01000413.1: 1843-2118                                 | ●        | 1.00        | ●        | 1.00        |
| hypothetical protein                                                                                    | AEAL01000407.1: 5967-6473                                 | ●        | 1.00        | ●        | 1.00        |
| FIG00635456: hypothetical protein                                                                       | AEAL01000407.1: 6466-7362                                 | ●        | 1.00        | ●        | 1.00        |
| ParA family protein                                                                                     | AEAL01000388.1: 662-943                                   | ●        | 1.00        | ●        | 1.00        |
| Levansucrase (EC 2.4.1.10);Ontology_term=KEGG_ENZYME:2.4.1.10                                           | AEAL01000384.1: 2764-4059                                 | ●        | 1.00        | ●        | 1.00        |
| <b>Protein with ParB-like nuclease domain in PFGI-1-like cluster</b>                                    | <b>AEAL01000369.1: 6-1274</b>                             | ○        | <b>0.02</b> | ●        | <b>0.84</b> |
| <b>FIG004780: hypothetical protein in PFGI-1-like cluster</b>                                           | <b>AEAL01000369.1: 1311-2048</b>                          | ○        | <b>0.07</b> | ●        | <b>0.96</b> |
| <b>DNA/RNA helicase in PFGI-1-like cluster</b>                                                          | <b>AEAL01000369.1: 8387-10381</b>                         | ○        | <b>0.04</b> | ●        | <b>0.84</b> |
| Conjugative transfer protein PilL in PFGI-1-like cluster                                                | AEAL01000369.1: 11925-13070                               | ○        | 0.04        | ◐        | 0.28        |
| Conjugative transfer protein PilN in PFGI-1-like cluster                                                | AEAL01000369.1: 13067-14803                               | ○        | 0.04        | ○        | 0.13        |
| Plasmid stability protein stbB                                                                          | AEAL01000333.1: 1398-1544                                 | ●        | 1.00        | ●        | 1.00        |
| Plasmid stability protein stbC                                                                          | AEAL01000333.1: 1541-1663                                 | ●        | 1.00        | ●        | 1.00        |
| SanC2C putative                                                                                         | AEAL01000332.1: 469-840                                   | ●        | 1.00        | ●        | 1.00        |
| FIG00959378: hypothetical protein                                                                       | AEAL01000332.1: 3457-4377                                 | ●        | 1.00        | ●        | 1.00        |
| putative integrase protein                                                                              | AEAL01000941.1: 530-2188                                  | ●        | 1.00        | ●        | 1.00        |
| Unknown2C probable hemolysin/adhesin                                                                    | AEAL01000603.1: 32-6979                                   | ●        | 0.99        | ●        | 0.99        |
| VgrG protein                                                                                            | AEAL01000317.1: 40708-42735                               | ●        | 1.00        | ●        | 1.00        |
| avirulence protein                                                                                      | AEAL01000312.1: 16469-16915                               | ●        | 1.00        | ●        | 1.00        |
| site-specific recombinase2C phage integrase family                                                      | AEAL01000311.1: 1070-2080                                 | ●        | 1.00        | ●        | 1.00        |
| Serine protease                                                                                         | AEAL01000311.1: 2058-3113                                 | ○        | 0.08        | ○        | 0.08        |
| FIG00958716: hypothetical protein                                                                       | AEAL01000309.1: 111-719                                   | ◐        | 0.52        | ◐        | 0.62        |
| Serine protease                                                                                         | AEAL01000309.1: 2600-4696                                 | ○        | 0.06        | ○        | 0.08        |
| hypothetical protein                                                                                    | AEAL01000307.1: 49-171                                    | ●        | 1.00        | ●        | 1.00        |
| FIG00961386: hypothetical protein                                                                       | AEAL01000306.1: 1534-1884                                 | ●        | 1.00        | ●        | 1.00        |
| FIG00961386: hypothetical protein                                                                       | AEAL01000306.1: 1997-2341                                 | ●        | 1.00        | ●        | 1.00        |
| hypothetical protein                                                                                    | AEAL01000814.1: 103-225                                   | ●        | 0.89        | ●        | 0.96        |
| Hemolysin                                                                                               | AEAL01000595.1: 3352-12186                                | ●        | 1.00        | ●        | 1.00        |
| FIG00965775: hypothetical protein                                                                       | AEAL01000794.1: 186-332                                   | ●        | 1.00        | ●        | 1.00        |
| hypothetical protein                                                                                    | AEAL01000592.1: 1167-1292                                 | ●        | 1.00        | ●        | 1.00        |
| hypothetical protein                                                                                    | AEAL01000281.1: 13057-13194                               | ●        | 1.00        | ●        | 1.00        |
| chromosome segregation ATPase                                                                           | AEAL01000591.1: 49-1113                                   | ◐        | 0.66        | ◐        | 0.66        |
| hypothetical protein                                                                                    | AEAL01000281.1: 37372-37632                               | ●        | 1.00        | ●        | 1.00        |
| membrane protein2C putative                                                                             | AEAL01000279.1: 1763-2290                                 | ●        | 1.00        | ●        | 1.00        |
| FIG00964546: hypothetical protein                                                                       | AEAL01000279.1: 2416-3252                                 | ●        | 1.00        | ●        | 1.00        |
| ABC-type polar amino acid transport system2C ATPase component                                           | AEAL01000276.1: 6929-7726                                 | ●        | 1.00        | ●        | 1.00        |
| ABC-type amino acid transport/signal transduction systems2C periplasmic component                       | AEAL01000276.1: 9108-9461                                 | ●        | 1.00        | ●        | 1.00        |

**Supplementary Table 5.** Gene contents of isolates CFBP7286 (Europe) and CH2010-6 (China) in the region of the PPHGI-1-like island based on aligning reads against the reference genome of *Psa* MAFF302091.

|                                                                            |                             |   |      |   |      |
|----------------------------------------------------------------------------|-----------------------------|---|------|---|------|
| ABC-type amino acid transport/signal transduction systems2C periplasmic co | AEAL01000276.1: 9680-9979   | ● | 1.00 | ● | 1.00 |
| Cellulose synthase operon protein C                                        | AEAL01000269.1: 272-4087    | ◐ | 0.57 | ◐ | 0.57 |
| putative inner membrane protein                                            | AEAL01000263.1: 72-563      | ● | 0.94 | ● | 0.94 |
| YoeB toxin protein                                                         | AEAL01000258.1: 17171-17473 | ● | 1.00 | ● | 1.00 |
| Colicin immunity protein                                                   | AEAL01000250.1: 39-302      | ● | 1.00 | ● | 1.00 |
| candidate type III effector HolPtoQ                                        | AEAL01000242.1: 132-1475    | ● | 1.00 | ● | 1.00 |
| hypothetical protein                                                       | AEAL01000242.1: 2915-3055   | ● | 1.00 | ● | 1.00 |
| hypothetical protein                                                       | AEAL01000242.1: 3006-3356   | ● | 1.00 | ● | 1.00 |
| hypothetical protein                                                       | AEAL01000231.1: 408-548     | ● | 1.00 | ● | 1.00 |
| protein of unknown function DUF1526                                        | AEAL01000231.1: 532-1002    | ● | 1.00 | ● | 1.00 |
| FIG045374: Type II restriction enzyme2C methylase subunit YeeA             | AEAL01000200.1: 1307-3379   | ● | 1.00 | ● | 1.00 |
| Protein involved in meta-pathway of phenol degradation                     | AEAL01000200.1: 3364-4257   | ○ | 0.05 | ○ | 0.05 |
| hypothetical protein                                                       | AEAL01000188.1: 40780-40899 | ● | 1.00 | ● | 1.00 |
| ATP binding protein                                                        | AEAL01000180.1: 50-1561     | ● | 1.00 | ● | 1.00 |
| FIG00963102: hypothetical protein                                          | AEAL01000144.1: 165-1538    | ● | 1.00 | ● | 1.00 |
| hypothetical protein                                                       | AEAL01000140.1: 1432-1980   | ● | 1.00 | ● | 1.00 |
| hypothetical protein                                                       | AEAL01000138.1: 1619-1762   | ● | 1.00 | ● | 1.00 |
| hypothetical protein                                                       | AEAL01000138.1: 1799-2344   | ● | 1.00 | ● | 1.00 |
| NreA-like protein                                                          | AEAL01000138.1: 2573-2866   | ● | 1.00 | ● | 1.00 |
| Nickel and cobalt efflux transporter rcnA                                  | AEAL01000138.1: 2874-3746   | ● | 1.00 | ● | 1.00 |
| hypothetical protein                                                       | AEAL01000119.1: 128-292     | ● | 1.00 | ● | 1.00 |
| Putative heat shock protein YegD                                           | AEAL01000119.1: 842-2407    | ● | 1.00 | ● | 1.00 |
| type III effector AvrB4-2                                                  | AEAL01000939.1: 1249-2211   | ● | 1.00 | ● | 1.00 |
| Transcriptional regulator2C LysR family                                    | AEAL01000068.1: 37950-38849 | ● | 1.00 | ● | 1.00 |
| Unknown pentose kinase TM0952                                              | AEAL01000063.1: 11806-13299 | ● | 0.92 | ● | 0.95 |
| Transketolase2C C-terminal section (EC 2.2.1.1);Ontology_term=KEGG_ENZY    | AEAL01000063.1: 13312-14244 | ● | 1.00 | ● | 1.00 |
| Transketolase2C N-terminal section (EC 2.2.1.1);Ontology_term=KEGG_ENZY    | AEAL01000063.1: 14234-15220 | ● | 1.00 | ● | 1.00 |
| Xylose ABC transporter2C permease protein XylH                             | AEAL01000063.1: 15434-16015 | ● | 1.00 | ● | 1.00 |
| Xylose ABC transporter2C permease protein XylH                             | AEAL01000063.1: 16016-16438 | ● | 1.00 | ● | 1.00 |
| Xylose ABC transporter2C periplasmic xylose-binding protein XylF           | AEAL01000063.1: 16505-17437 | ● | 1.00 | ● | 1.00 |
| D-xylose transport ATP-binding protein XylG                                | AEAL01000063.1: 17453-18985 | ● | 1.00 | ● | 1.00 |
| Short chain dehydrogenase                                                  | AEAL01000063.1: 19017-19781 | ● | 1.00 | ● | 1.00 |
| SHORT CHAIN DEHYDROGENASE                                                  | AEAL01000063.1: 19812-20612 | ● | 1.00 | ● | 1.00 |
| Putative transcriptional regulator of sorbose uptake and utilization genes | AEAL01000063.1: 20694-21647 | ● | 0.99 | ● | 1.00 |
| titin                                                                      | AEAL01000061.1: 106-1275    | ● | 1.00 | ● | 1.00 |
| RecA/RadA recombinase                                                      | AEAL01000061.1: 1250-1873   | ● | 1.00 | ● | 1.00 |
| SOS-response repressor and protease LexA (EC 3.4.21.88);Ontology_term=KEGG | AEAL01000061.1: 1870-2487   | ● | 1.00 | ● | 1.00 |
| titin                                                                      | AEAL01000060.1: 805-2034    | ● | 1.00 | ● | 1.00 |
| DNA polymerase III alpha subunit (EC 2.7.7.7);Ontology_term=KEGG_ENZYM     | AEAL01000060.1: 2092-2856   | ● | 1.00 | ● | 1.00 |
| DNA polymerase-like protein PA0670                                         | AEAL01000060.1: 2853-3032   | ● | 1.00 | ● | 1.00 |
| hypothetical protein                                                       | AEAL01000057.1: 264-509     | ● | 1.00 | ● | 1.00 |
| Shufflon-specific DNA recombinase                                          | AEAL01000057.1: 506-1483    | ● | 1.00 | ● | 1.00 |
| hypothetical protein                                                       | AEAL01000038.1: 8424-8687   | ● | 1.00 | ● | 1.00 |
| type III effector HopPtoN                                                  | AEAL01000004.1: 713-1621    | ● | 1.00 | ● | 1.00 |
| conserved effector locus protein                                           | AEAL01000004.1: 1779-2258   | ● | 1.00 | ● | 1.00 |
| FIG00958014: hypothetical protein                                          | AEAL01000004.1: 18757-19020 | ● | 1.00 | ● | 1.00 |
| hypothetical protein                                                       | AEAL01000001.1: 695-868     | ◐ | 0.59 | ◐ | 0.59 |
| transcriptional regulator2C AraC family protein                            | AEAL01000538.1: 85-930      | ● | 1.00 | ● | 1.00 |
| ABC-type amino acid transport/signal transduction systems2C periplasmic co | AEAL01000538.1: 2008-2259   | ● | 1.00 | ● | 1.00 |
| ABC-type amino acid transport/signal transduction systems2C periplasmic co | AEAL01000538.1: 2314-2880   | ● | 1.00 | ● | 1.00 |
| Glutamate transport membrane-spanning protein                              | AEAL01000538.1: 3635-4294   | ● | 1.00 | ● | 1.00 |
| Glutamate transport membrane-spanning protein                              | AEAL01000538.1: 4275-4940   | ● | 1.00 | ● | 1.00 |
| FIG00962023: hypothetical protein                                          | AEAL01000538.1: 5250-5411   | ● | 1.00 | ● | 1.00 |
| transcriptional regulator2C AraC family                                    | AEAL01000537.1: 10018-11001 | ● | 1.00 | ● | 1.00 |
| hypothetical protein                                                       | AEAL01000537.1: 11211-11390 | ● | 1.00 | ● | 1.00 |
| Transcriptional regulator2C TetR family                                    | AEAL01000537.1: 12505-13086 | ● | 1.00 | ● | 1.00 |
| NADH:flavin oxidoreductases2C Old Yellow Enzyme family                     | AEAL01000537.1: 13142-13543 | ◐ | 0.65 | ◐ | 0.66 |
| NADH:flavin oxidoreductases2C Old Yellow Enzyme family                     | AEAL01000537.1: 13584-14252 | ● | 1.00 | ● | 1.00 |
| Permeases of the major facilitator superfamily                             | AEAL01000537.1: 14310-14696 | ● | 1.00 | ● | 1.00 |
| oxidoreductase ylbE                                                        | AEAL01000537.1: 14757-15452 | ● | 1.00 | ● | 1.00 |
| NADH:flavin oxidoreductases2C Old Yellow Enzyme family                     | AEAL01000537.1: 15430-15612 | ● | 1.00 | ● | 1.00 |
| FIG00961033: hypothetical protein                                          | AEAL01000536.1: 543-1253    | ◐ | 0.77 | ● | 0.83 |
| FIG00959133: hypothetical protein                                          | AEAL01000536.1: 1250-1786   | ◐ | 0.80 | ● | 0.82 |

**Supplementary Table 5.** Gene contents of isolates CFBP7286 (Europe) and CH2010-6 (China) in the region of the PPHGI-1-like island based on aligning reads against the reference genome of *Psa* MAFF302091.

|                                                                                |                             |   |      |   |      |
|--------------------------------------------------------------------------------|-----------------------------|---|------|---|------|
| FIG00958203: hypothetical protein                                              | AEAL01000536.1: 1783-2709   | ● | 0.94 | ● | 0.99 |
| FIG00958486: hypothetical protein                                              | AEAL01000536.1: 2706-3149   | ● | 1.00 | ● | 1.00 |
| Phage tail fiber protein                                                       | AEAL01000536.1: 3306-5750   | ● | 1.00 | ● | 1.00 |
| FIG00953961: hypothetical protein                                              | AEAL01000536.1: 5759-6283   | ● | 0.98 | ● | 0.98 |
| Putative bacteriophage protein                                                 | AEAL01000536.1: 6280-7449   | ● | 1.00 | ● | 1.00 |
| FIG00953163: hypothetical protein                                              | AEAL01000536.1: 7446-7763   | ● | 0.96 | ● | 1.00 |
| Phage-related tail protein                                                     | AEAL01000536.1: 7763-10063  | ● | 0.81 | ● | 0.82 |
| FIG00958553: hypothetical protein                                              | AEAL01000536.1: 10069-10212 | ● | 1.00 | ● | 1.00 |
| FIG00958914: hypothetical protein                                              | AEAL01000536.1: 10233-10523 | ● | 1.00 | ● | 1.00 |
| Endopeptidase (EC 3.4.-.-);Ontology_term=KEGG_ENZYME:3.4.-.-                   | AEAL01000536.1: 10557-11036 | ● | 0.91 | ● | 0.92 |
| putative phage lysozyme                                                        | AEAL01000536.1: 11033-11560 | ● | 1.00 | ● | 1.00 |
| FIG00964753: hypothetical protein                                              | AEAL01000536.1: 11557-11763 | ● | 1.00 | ● | 1.00 |
| Hypothetical Zinc-finger containing protein                                    | AEAL01000536.1: 11760-11972 | ● | 1.00 | ● | 1.00 |
| FIG00961890: hypothetical protein                                              | AEAL01000536.1: 11972-12424 | ● | 0.99 | ● | 0.99 |
| Conserved hypothetical phage protein                                           | AEAL01000536.1: 12428-13540 | ● | 0.95 | ● | 0.97 |
| FIG00956268: hypothetical protein                                              | AEAL01000536.1: 13555-14223 | ● | 0.62 | ● | 0.53 |
| FIG00955158: hypothetical protein                                              | AEAL01000536.1: 14213-14656 | ● | 0.87 | ● | 0.87 |
| Probable head completion/stabilization protein                                 | AEAL01000536.1: 14653-15114 | ● | 1.00 | ● | 1.00 |
| hypothetical protein                                                           | AEAL01000536.1: 15150-15446 | ● | 1.00 | ● | 1.00 |
| hypothetical protein                                                           | AEAL01000536.1: 15940-16239 | ● | 1.00 | ● | 1.00 |
| FIG00967513: hypothetical protein                                              | AEAL01000536.1: 16379-17101 | ● | 1.00 | ● | 1.00 |
| Phage-related capsid packaging protein                                         | AEAL01000536.1: 21533-22048 | ● | 0.97 | ● | 0.98 |
| hypothetical protein                                                           | AEAL01000536.1: 22244-22384 | ● | 0.87 | ● | 0.89 |
| hypothetical protein                                                           | AEAL01000536.1: 23636-23890 | ● | 1.00 | ● | 1.00 |
| hypothetical protein                                                           | AEAL01000536.1: 24329-24577 | ● | 0.59 | ● | 0.60 |
| prophage PSPPH062C site-specific recombinase2C phage integrase family          | AEAL01000536.1: 24540-25025 | ● | 1.00 | ● | 1.00 |
| hypothetical protein                                                           | AEAL01000536.1: 25277-25567 | ● | 1.00 | ● | 1.00 |
| Glucans biosynthesis protein G precursor                                       | AEAL01000534.1: 1121-2707   | ● | 1.00 | ● | 1.00 |
| Two-component response regulator                                               | AEAL01000533.1: 42-1508     | ● | 1.00 | ● | 1.00 |
| ATP-dependent helicase HrpB                                                    | AEAL01000521.1: 2110-4209   | ○ | 0.03 | ○ | 0.03 |
| hypothetical protein                                                           | AEAL01000937.1: 326-520     | ● | 1.00 | ● | 1.00 |
| MULTIDRUG RESISTANCE PROTEIN 1                                                 | AEAL01000502.1: 387-1358    | ● | 1.00 | ● | 1.00 |
| 3-oxoacyl-[acyl-carrier-protein] synthase2C KASIII (EC 2.3.1.41);Ontology_ter  | AEAL01000502.1: 1401-2396   | ● | 1.00 | ● | 1.00 |
| bacterial transferase2C hexapeptide repeat protein                             | AEAL01000502.1: 2423-3049   | ● | 1.00 | ● | 1.00 |
| Dehydrogenases with different specificities (related to short-chain alcohol de | AEAL01000502.1: 3061-3822   | ● | 1.00 | ● | 1.00 |
| FIG00955995: hypothetical protein                                              | AEAL01000502.1: 3877-4083   | ● | 1.00 | ● | 1.00 |
| ABC-type amino acid transport2C signal transduction systems2C periplasmic      | AEAL01000496.1: 10961-11716 | ○ | 0.04 | ○ | 0.04 |
| FIG00962378: hypothetical protein                                              | AEAL01000495.1: 435-1385    | ● | 1.00 | ● | 1.00 |
| hypothetical protein                                                           | AEAL01000650.1: 781-915     | ● | 1.00 | ● | 1.00 |
