# Supplementary material for: Pseudomonas syringae pv. actinidiae (PSA) Isolates from Recent Bacterial Canker of Kiwifruit Outbreaks Belong to the Same Genetic Lineage
Source: PLoS One. 2012 May 9;7(5):e36518. doi: 10.1371/journal.pone.0036518 (PMC3348921; doi:10.1371/journal.pone.0036518)
Supplement: Table S2 — Complete list of SNPs distinguishing the sequenced PSA genomes from each other and from P. syringae pv. theae NCPPB 2598. (XLSX) [file pone.0036518.s002.xlsx]

## Sheet: Sheet1
Supplementary Table 2: Complete list of SNPs distinguishing the sequenced PSA genomes from each other and from P. syringae pv. theae NCPPB 2598.
Positions refer to the position in the assembled genome of P. syringae pv. theae NCPPB 2598.
seq_id	position	reference	346	7285	7286	7287	K2	KW41	PA459	CH2010-5	CH2010-6	theae_2598	dataset
scf_12387_592_contig_29	1444	c	c	T	c	c	c	c	c	c	c	c	7285
scf_12387_876_contig_3	198	c	c	c	A	c	c	c	c	c	c	c	7286
scf_12387_163_contig_3	12532	c	c	c	c	T	c	c	c	c	c	c	7287
scf_12387_190_contig_7	4380	t	C	C	C	C	t	t	t	t	t	t	346 7285 7286 7287
scf_12387_100_contig_1	1093	g	T	T	T	T	T	T	T	T	T	g	346 7285 7286 7287 K2 KW41 PA459 PsaV PsaVI
scf_12387_100_contig_1	11355	g	A	A	A	A	A	A	A	A	A	g	346 7285 7286 7287 K2 KW41 PA459 PsaV PsaVI
scf_12387_100_contig_1	11382	g	A	A	A	A	A	A	A	A	A	g	346 7285 7286 7287 K2 KW41 PA459 PsaV PsaVI
scf_12387_100_contig_1	11769	c	T	T	T	T	T	T	T	T	T	c	346 7285 7286 7287 K2 KW41 PA459 PsaV PsaVI
scf_12387_100_contig_1	11847	g	C	C	C	C	C	C	C	C	C	g	346 7285 7286 7287 K2 KW41 PA459 PsaV PsaVI
scf_12387_100_contig_1	11874	c	T	T	T	T	T	T	T	T	T	c	346 7285 7286 7287 K2 KW41 PA459 PsaV PsaVI
scf_12387_100_contig_1	11918	t	C	C	C	C	C	C	C	C	C	t	346 7285 7286 7287 K2 KW41 PA459 PsaV PsaVI
scf_12387_100_contig_1	12159	a	G	G	G	G	G	G	G	G	G	a	346 7285 7286 7287 K2 KW41 PA459 PsaV PsaVI
scf_12387_100_contig_1	12546	a	G	G	G	G	G	G	G	G	G	a	346 7285 7286 7287 K2 KW41 PA459 PsaV PsaVI
scf_12387_100_contig_1	13010	c	T	T	T	T	T	T	T	T	T	c	346 7285 7286 7287 K2 KW41 PA459 PsaV PsaVI
scf_12387_100_contig_1	13041	a	G	G	G	G	G	G	G	G	G	a	346 7285 7286 7287 K2 KW41 PA459 PsaV PsaVI
scf_12387_100_contig_1	14296	t	C	C	C	C	C	C	C	C	C	t	346 7285 7286 7287 K2 KW41 PA459 PsaV PsaVI
scf_12387_100_contig_1	14976	c	T	T	T	T	T	T	T	T	T	c	346 7285 7286 7287 K2 KW41 PA459 PsaV PsaVI
scf_12387_100_contig_1	15090	a	G	G	G	G	G	G	G	G	G	a	346 7285 7286 7287 K2 KW41 PA459 PsaV PsaVI
scf_12387_100_contig_1	15141	c	A	A	A	A	A	A	A	A	A	c	346 7285 7286 7287 K2 KW41 PA459 PsaV PsaVI
scf_12387_100_contig_1	15324	a	G	G	G	G	G	G	G	G	G	a	346 7285 7286 7287 K2 KW41 PA459 PsaV PsaVI
scf_12387_100_contig_1	15360	g	A	A	A	A	A	A	A	A	A	g	346 7285 7286 7287 K2 KW41 PA459 PsaV PsaVI
scf_12387_100_contig_1	15441	g	A	A	A	A	A	A	A	A	A	g	346 7285 7286 7287 K2 KW41 PA459 PsaV PsaVI
scf_12387_100_contig_1	15651	g	A	A	A	A	A	A	A	A	A	g	346 7285 7286 7287 K2 KW41 PA459 PsaV PsaVI
scf_12387_100_contig_1	1585	c	T	T	T	T	T	T	T	T	T	c	346 7285 7286 7287 K2 KW41 PA459 PsaV PsaVI
scf_12387_100_contig_1	1754	a	G	G	G	G	G	G	G	G	G	a	346 7285 7286 7287 K2 KW41 PA459 PsaV PsaVI
scf_12387_100_contig_1	17883	c	T	T	T	T	T	T	T	T	T	c	346 7285 7286 7287 K2 KW41 PA459 PsaV PsaVI
scf_12387_100_contig_1	181	c	G	G	G	G	G	G	G	G	G	c	346 7285 7286 7287 K2 KW41 PA459 PsaV PsaVI
scf_12387_100_contig_1	1817	t	A	A	A	A	A	A	A	A	A	t	346 7285 7286 7287 K2 KW41 PA459 PsaV PsaVI
scf_12387_100_contig_1	1925	a	G	G	G	G	G	G	G	G	G	a	346 7285 7286 7287 K2 KW41 PA459 PsaV PsaVI
scf_12387_100_contig_1	226	a	G	G	G	G	G	G	G	G	G	a	346 7285 7286 7287 K2 KW41 PA459 PsaV PsaVI
scf_12387_100_contig_1	2743	t	A	A	A	A	A	A	A	A	A	t	346 7285 7286 7287 K2 KW41 PA459 PsaV PsaVI
scf_12387_100_contig_1	3231	a	G	G	G	G	G	G	G	G	G	a	346 7285 7286 7287 K2 KW41 PA459 PsaV PsaVI
scf_12387_100_contig_1	3249	g	A	A	A	A	A	A	A	A	A	g	346 7285 7286 7287 K2 KW41 PA459 PsaV PsaVI
scf_12387_100_contig_1	3710	g	A	A	A	A	A	A	A	A	A	g	346 7285 7286 7287 K2 KW41 PA459 PsaV PsaVI
scf_12387_100_contig_1	3807	c	T	T	T	T	T	T	T	T	T	c	346 7285 7286 7287 K2 KW41 PA459 PsaV PsaVI
scf_12387_100_contig_1	388	t	C	C	C	C	C	C	C	C	C	t	346 7285 7286 7287 K2 KW41 PA459 PsaV PsaVI
scf_12387_100_contig_1	3905	t	C	C	C	C	C	C	C	C	C	t	346 7285 7286 7287 K2 KW41 PA459 PsaV PsaVI
scf_12387_100_contig_1	4058	a	G	G	G	G	G	G	G	G	G	a	346 7285 7286 7287 K2 KW41 PA459 PsaV PsaVI
scf_12387_100_contig_1	4109	a	G	G	G	G	G	G	G	G	G	a	346 7285 7286 7287 K2 KW41 PA459 PsaV PsaVI
scf_12387_100_contig_1	5039	a	G	G	G	G	G	G	G	G	G	a	346 7285 7286 7287 K2 KW41 PA459 PsaV PsaVI
scf_12387_100_contig_1	5165	a	G	G	G	G	G	G	G	G	G	a	346 7285 7286 7287 K2 KW41 PA459 PsaV PsaVI
scf_12387_100_contig_1	5174	t	C	C	C	C	C	C	C	C	C	t	346 7285 7286 7287 K2 KW41 PA459 PsaV PsaVI
scf_12387_100_contig_1	5255	c	T	T	T	T	T	T	T	T	T	c	346 7285 7286 7287 K2 KW41 PA459 PsaV PsaVI
scf_12387_100_contig_1	5258	a	G	G	G	G	G	G	G	G	G	a	346 7285 7286 7287 K2 KW41 PA459 PsaV PsaVI
scf_12387_100_contig_1	5528	t	A	A	A	A	A	A	A	A	A	t	346 7285 7286 7287 K2 KW41 PA459 PsaV PsaVI
scf_12387_100_contig_1	7479	c	A	A	A	A	A	A	A	A	A	c	346 7285 7286 7287 K2 KW41 PA459 PsaV PsaVI
scf_12387_100_contig_1	823	c	T	T	T	T	T	T	T	T	T	c	346 7285 7286 7287 K2 KW41 PA459 PsaV PsaVI
scf_12387_100_contig_1	9337	g	A	A	A	A	A	A	A	A	A	g	346 7285 7286 7287 K2 KW41 PA459 PsaV PsaVI
scf_12387_100_contig_3	1059	c	T	T	T	T	T	T	T	T	T	c	346 7285 7286 7287 K2 KW41 PA459 PsaV PsaVI
scf_12387_100_contig_3	1069	a	C	C	C	C	C	C	C	C	C	a	346 7285 7286 7287 K2 KW41 PA459 PsaV PsaVI
scf_12387_100_contig_3	1153	c	T	T	T	T	T	T	T	T	T	c	346 7285 7286 7287 K2 KW41 PA459 PsaV PsaVI
scf_12387_100_contig_3	1207	c	T	T	T	T	T	T	T	T	T	c	346 7285 7286 7287 K2 KW41 PA459 PsaV PsaVI
scf_12387_100_contig_3	1300	a	G	G	G	G	G	G	G	G	G	a	346 7285 7286 7287 K2 KW41 PA459 PsaV PsaVI
scf_12387_100_contig_3	1304	t	G	G	G	G	G	G	G	G	G	t	346 7285 7286 7287 K2 KW41 PA459 PsaV PsaVI
scf_12387_100_contig_3	1339	t	G	G	G	G	G	G	G	G	G	t	346 7285 7286 7287 K2 KW41 PA459 PsaV PsaVI
scf_12387_100_contig_3	1468	a	G	G	G	G	G	G	G	G	G	a	346 7285 7286 7287 K2 KW41 PA459 PsaV PsaVI
scf_12387_100_contig_3	1585	g	A	A	A	A	A	A	A	A	A	g	346 7285 7286 7287 K2 KW41 PA459 PsaV PsaVI
scf_12387_100_contig_3	2942	c	T	T	T	T	T	T	T	T	T	c	346 7285 7286 7287 K2 KW41 PA459 PsaV PsaVI
scf_12387_100_contig_3	2945	g	A	A	A	A	A	A	A	A	A	g	346 7285 7286 7287 K2 KW41 PA459 PsaV PsaVI
scf_12387_100_contig_3	2978	g	A	A	A	A	A	A	A	A	A	g	346 7285 7286 7287 K2 KW41 PA459 PsaV PsaVI
scf_12387_100_contig_3	3044	c	T	T	T	T	T	T	T	T	T	c	346 7285 7286 7287 K2 KW41 PA459 PsaV PsaVI
scf_12387_100_contig_3	3188	c	G	G	G	G	G	G	G	G	G	c	346 7285 7286 7287 K2 KW41 PA459 PsaV PsaVI
scf_12387_100_contig_3	3202	a	G	G	G	G	G	G	G	G	G	a	346 7285 7286 7287 K2 KW41 PA459 PsaV PsaVI
scf_12387_100_contig_3	3398	a	G	G	G	G	G	G	G	G	G	a	346 7285 7286 7287 K2 KW41 PA459 PsaV PsaVI
scf_12387_100_contig_3	3403	g	A	A	A	A	A	A	A	A	A	g	346 7285 7286 7287 K2 KW41 PA459 PsaV PsaVI
scf_12387_100_contig_3	3467	c	T	T	T	T	T	T	T	T	T	c	346 7285 7286 7287 K2 KW41 PA459 PsaV PsaVI
scf_12387_100_contig_3	3525	c	T	T	T	T	T	T	T	T	T	c	346 7285 7286 7287 K2 KW41 PA459 PsaV PsaVI
scf_12387_100_contig_3	3844	c	T	T	T	T	T	T	T	T	T	c	346 7285 7286 7287 K2 KW41 PA459 PsaV PsaVI
scf_12387_100_contig_3	3982	c	T	T	T	T	T	T	T	T	T	c	346 7285 7286 7287 K2 KW41 PA459 PsaV PsaVI
scf_12387_100_contig_3	4183	c	T	T	T	T	T	T	T	T	T	c	346 7285 7286 7287 K2 KW41 PA459 PsaV PsaVI
scf_12387_100_contig_3	4186	c	T	T	T	T	T	T	T	T	T	c	346 7285 7286 7287 K2 KW41 PA459 PsaV PsaVI
scf_12387_100_contig_3	4477	t	C	C	C	C	C	C	C	C	C	t	346 7285 7286 7287 K2 KW41 PA459 PsaV PsaVI
scf_12387_100_contig_3	4483	g	C	C	C	C	C	C	C	C	C	g	346 7285 7286 7287 K2 KW41 PA459 PsaV PsaVI
scf_12387_100_contig_3	4558	g	A	A	A	A	A	A	A	A	A	g	346 7285 7286 7287 K2 KW41 PA459 PsaV PsaVI
scf_12387_100_contig_3	478	c	G	G	G	G	G	G	G	G	G	c	346 7285 7286 7287 K2 KW41 PA459 PsaV PsaVI
scf_12387_100_contig_3	5099	c	T	T	T	T	T	T	T	T	T	c	346 7285 7286 7287 K2 KW41 PA459 PsaV PsaVI
scf_12387_100_contig_3	5104	c	T	T	T	T	T	T	T	T	T	c	346 7285 7286 7287 K2 KW41 PA459 PsaV PsaVI
scf_12387_100_contig_3	5116	c	T	T	T	T	T	T	T	T	T	c	346 7285 7286 7287 K2 KW41 PA459 PsaV PsaVI
scf_12387_100_contig_3	5140	g	A	A	A	A	A	A	A	A	A	g	346 7285 7286 7287 K2 KW41 PA459 PsaV PsaVI
scf_12387_100_contig_3	865	c	T	T	T	T	T	T	T	T	T	c	346 7285 7286 7287 K2 KW41 PA459 PsaV PsaVI
scf_12387_100_contig_5	125	c	T	T	T	T	T	T	T	T	T	c	346 7285 7286 7287 K2 KW41 PA459 PsaV PsaVI
scf_12387_100_contig_5	1577	g	A	A	A	A	A	A	A	A	A	g	346 7285 7286 7287 K2 KW41 PA459 PsaV PsaVI
scf_12387_100_contig_5	163	c	T	T	T	T	T	T	T	T	T	c	346 7285 7286 7287 K2 KW41 PA459 PsaV PsaVI
scf_12387_100_contig_5	302	t	C	C	C	C	C	C	C	C	C	t	346 7285 7286 7287 K2 KW41 PA459 PsaV PsaVI
scf_12387_100_contig_5	416	t	C	C	C	C	C	C	C	C	C	t	346 7285 7286 7287 K2 KW41 PA459 PsaV PsaVI
scf_12387_100_contig_5	454	c	T	T	T	T	T	T	T	T	T	c	346 7285 7286 7287 K2 KW41 PA459 PsaV PsaVI
scf_12387_100_contig_5	490	a	T	T	T	T	T	T	T	T	T	a	346 7285 7286 7287 K2 KW41 PA459 PsaV PsaVI
scf_12387_100_contig_5	536	g	A	A	A	A	A	A	A	A	A	g	346 7285 7286 7287 K2 KW41 PA459 PsaV PsaVI
scf_12387_100_contig_5	562	c	T	T	T	T	T	T	T	T	T	c	346 7285 7286 7287 K2 KW41 PA459 PsaV PsaVI
scf_12387_100_contig_5	599	a	G	G	G	G	G	G	G	G	G	a	346 7285 7286 7287 K2 KW41 PA459 PsaV PsaVI
scf_12387_100_contig_5	608	g	A	A	A	A	A	A	A	A	A	g	346 7285 7286 7287 K2 KW41 PA459 PsaV PsaVI
scf_12387_100_contig_5	724	t	C	C	C	C	C	C	C	C	C	t	346 7285 7286 7287 K2 KW41 PA459 PsaV PsaVI
scf_12387_100_contig_5	823	c	T	T	T	T	T	T	T	T	T	c	346 7285 7286 7287 K2 KW41 PA459 PsaV PsaVI
scf_12387_100_contig_5	961	c	T	T	T	T	T	T	T	T	T	c	346 7285 7286 7287 K2 KW41 PA459 PsaV PsaVI
scf_12387_100_contig_7	215	t	G	G	G	G	G	G	G	G	G	t	346 7285 7286 7287 K2 KW41 PA459 PsaV PsaVI
scf_12387_100_contig_7	243	a	G	G	G	G	G	G	G	G	G	a	346 7285 7286 7287 K2 KW41 PA459 PsaV PsaVI
scf_12387_100_contig_7	265	t	C	C	C	C	C	C	C	C	C	t	346 7285 7286 7287 K2 KW41 PA459 PsaV PsaVI
scf_12387_100_contig_7	324	t	C	C	C	C	C	C	C	C	C	t	346 7285 7286 7287 K2 KW41 PA459 PsaV PsaVI
scf_12387_100_contig_7	615	g	A	A	A	A	A	A	A	A	A	g	346 7285 7286 7287 K2 KW41 PA459 PsaV PsaVI
scf_12387_100_contig_7	859	c	T	T	T	T	T	T	T	T	T	c	346 7285 7286 7287 K2 KW41 PA459 PsaV PsaVI
scf_12387_100_contig_7	891	g	A	A	A	A	A	A	A	A	A	g	346 7285 7286 7287 K2 KW41 PA459 PsaV PsaVI
scf_12387_100_contig_7	897	c	T	T	T	T	T	T	T	T	T	c	346 7285 7286 7287 K2 KW41 PA459 PsaV PsaVI
scf_12387_100_contig_7	990	c	T	T	T	T	T	T	T	T	T	c	346 7285 7286 7287 K2 KW41 PA459 PsaV PsaVI
scf_12387_100_contig_9	1153	g	C	C	C	C	C	C	C	C	C	g	346 7285 7286 7287 K2 KW41 PA459 PsaV PsaVI
scf_12387_100_contig_9	1534	t	C	C	C	C	C	C	C	C	C	t	346 7285 7286 7287 K2 KW41 PA459 PsaV PsaVI
scf_12387_100_contig_9	1537	t	C	C	C	C	C	C	C	C	C	t	346 7285 7286 7287 K2 KW41 PA459 PsaV PsaVI
scf_12387_100_contig_9	1723	a	C	C	C	C	C	C	C	C	C	a	346 7285 7286 7287 K2 KW41 PA459 PsaV PsaVI
scf_12387_100_contig_9	1726	c	T	T	T	T	T	T	T	T	T	c	346 7285 7286 7287 K2 KW41 PA459 PsaV PsaVI
scf_12387_100_contig_9	1768	c	A	A	A	A	A	A	A	A	A	c	346 7285 7286 7287 K2 KW41 PA459 PsaV PsaVI
scf_12387_100_contig_9	1783	c	T	T	T	T	T	T	T	T	T	c	346 7285 7286 7287 K2 KW41 PA459 PsaV PsaVI
scf_12387_100_contig_9	195	a	G	G	G	G	G	G	G	G	G	a	346 7285 7286 7287 K2 KW41 PA459 PsaV PsaVI
scf_12387_100_contig_9	2086	c	T	T	T	T	T	T	T	T	T	c	346 7285 7286 7287 K2 KW41 PA459 PsaV PsaVI
scf_12387_100_contig_9	2370	c	T	T	T	T	T	T	T	T	T	c	346 7285 7286 7287 K2 KW41 PA459 PsaV PsaVI
scf_12387_100_contig_9	865	g	A	A	A	A	A	A	A	A	A	g	346 7285 7286 7287 K2 KW41 PA459 PsaV PsaVI
scf_12387_100_contig_9	901	c	G	G	G	G	G	G	G	G	G	c	346 7285 7286 7287 K2 KW41 PA459 PsaV PsaVI
scf_12387_101_contig_1	397	c	T	T	T	T	T	T	T	T	T	c	346 7285 7286 7287 K2 KW41 PA459 PsaV PsaVI
scf_12387_101_contig_1	547	c	T	T	T	T	T	T	T	T	T	c	346 7285 7286 7287 K2 KW41 PA459 PsaV PsaVI
scf_12387_102_contig_1	1139	g	T	T	T	T	T	T	T	T	T	g	346 7285 7286 7287 K2 KW41 PA459 PsaV PsaVI
scf_12387_102_contig_1	1313	g	A	A	A	A	A	A	A	A	A	g	346 7285 7286 7287 K2 KW41 PA459 PsaV PsaVI
scf_12387_102_contig_1	1316	g	T	T	T	T	T	T	T	T	T	g	346 7285 7286 7287 K2 KW41 PA459 PsaV PsaVI
scf_12387_102_contig_1	1358	c	A	A	A	A	A	A	A	A	A	c	346 7285 7286 7287 K2 KW41 PA459 PsaV PsaVI
scf_12387_102_contig_1	1623	a	T	T	T	T	T	T	T	T	T	a	346 7285 7286 7287 K2 KW41 PA459 PsaV PsaVI
scf_12387_102_contig_1	2241	a	G	G	G	G	G	G	G	G	G	a	346 7285 7286 7287 K2 KW41 PA459 PsaV PsaVI
scf_12387_102_contig_1	2493	g	A	A	A	A	A	A	A	A	A	g	346 7285 7286 7287 K2 KW41 PA459 PsaV PsaVI
scf_12387_102_contig_1	2670	g	T	T	T	T	T	T	T	T	T	g	346 7285 7286 7287 K2 KW41 PA459 PsaV PsaVI
scf_12387_102_contig_1	2892	g	A	A	A	A	A	A	A	A	A	g	346 7285 7286 7287 K2 KW41 PA459 PsaV PsaVI
scf_12387_102_contig_1	3198	t	C	C	C	C	C	C	C	C	C	t	346 7285 7286 7287 K2 KW41 PA459 PsaV PsaVI
scf_12387_102_contig_1	3474	g	A	A	A	A	A	A	A	A	A	g	346 7285 7286 7287 K2 KW41 PA459 PsaV PsaVI
scf_12387_102_contig_1	3580	c	T	T	T	T	T	T	T	T	T	c	346 7285 7286 7287 K2 KW41 PA459 PsaV PsaVI
scf_12387_102_contig_1	3821	g	A	A	A	A	A	A	A	A	A	g	346 7285 7286 7287 K2 KW41 PA459 PsaV PsaVI
scf_12387_102_contig_1	4141	t	C	C	C	C	C	C	C	C	C	t	346 7285 7286 7287 K2 KW41 PA459 PsaV PsaVI
scf_12387_102_contig_1	4149	t	C	C	C	C	C	C	C	C	C	t	346 7285 7286 7287 K2 KW41 PA459 PsaV PsaVI
scf_12387_102_contig_1	992	g	T	T	T	T	T	T	T	T	T	g	346 7285 7286 7287 K2 KW41 PA459 PsaV PsaVI
scf_12387_102_contig_3	1396	g	T	T	T	T	T	T	T	T	T	g	346 7285 7286 7287 K2 KW41 PA459 PsaV PsaVI
scf_12387_102_contig_3	1453	g	A	A	A	A	A	A	A	A	A	g	346 7285 7286 7287 K2 KW41 PA459 PsaV PsaVI
scf_12387_102_contig_3	5039	c	T	T	T	T	T	T	T	T	T	c	346 7285 7286 7287 K2 KW41 PA459 PsaV PsaVI
scf_12387_102_contig_3	671	g	A	A	A	A	A	A	A	A	A	g	346 7285 7286 7287 K2 KW41 PA459 PsaV PsaVI
scf_12387_102_contig_3	6870	g	T	T	T	T	T	T	T	T	T	g	346 7285 7286 7287 K2 KW41 PA459 PsaV PsaVI
scf_12387_102_contig_3	6927	a	G	G	G	G	G	G	G	G	G	a	346 7285 7286 7287 K2 KW41 PA459 PsaV PsaVI
scf_12387_102_contig_3	701	g	A	A	A	A	A	A	A	A	A	g	346 7285 7286 7287 K2 KW41 PA459 PsaV PsaVI
scf_12387_102_contig_3	7278	g	T	T	T	T	T	T	T	T	T	g	346 7285 7286 7287 K2 KW41 PA459 PsaV PsaVI
scf_12387_102_contig_5	1247	a	G	G	G	G	G	G	G	G	G	a	346 7285 7286 7287 K2 KW41 PA459 PsaV PsaVI
scf_12387_102_contig_5	142	a	C	C	C	C	C	C	C	C	C	a	346 7285 7286 7287 K2 KW41 PA459 PsaV PsaVI
scf_12387_102_contig_5	2106	t	C	C	C	C	C	C	C	C	C	t	346 7285 7286 7287 K2 KW41 PA459 PsaV PsaVI
scf_12387_102_contig_5	2682	c	A	A	A	A	A	A	A	A	A	c	346 7285 7286 7287 K2 KW41 PA459 PsaV PsaVI
scf_12387_102_contig_5	3006	a	G	G	G	G	G	G	G	G	G	a	346 7285 7286 7287 K2 KW41 PA459 PsaV PsaVI
scf_12387_102_contig_5	3108	c	T	T	T	T	T	T	T	T	T	c	346 7285 7286 7287 K2 KW41 PA459 PsaV PsaVI
scf_12387_102_contig_5	3214	c	T	T	T	T	T	T	T	T	T	c	346 7285 7286 7287 K2 KW41 PA459 PsaV PsaVI
scf_12387_102_contig_5	3295	c	A	A	A	A	A	A	A	A	A	c	346 7285 7286 7287 K2 KW41 PA459 PsaV PsaVI
scf_12387_102_contig_5	3417	g	T	T	T	T	T	T	T	T	T	g	346 7285 7286 7287 K2 KW41 PA459 PsaV PsaVI
scf_12387_102_contig_5	3451	a	G	G	G	G	G	G	G	G	G	a	346 7285 7286 7287 K2 KW41 PA459 PsaV PsaVI
scf_12387_102_contig_5	3551	a	G	G	G	G	G	G	G	G	G	a	346 7285 7286 7287 K2 KW41 PA459 PsaV PsaVI
scf_12387_102_contig_5	3647	t	C	C	C	C	C	C	C	C	C	t	346 7285 7286 7287 K2 KW41 PA459 PsaV PsaVI
scf_12387_102_contig_5	3695	c	T	T	T	T	T	T	T	T	T	c	346 7285 7286 7287 K2 KW41 PA459 PsaV PsaVI
scf_12387_102_contig_7	4051	g	A	A	A	A	A	A	A	A	A	g	346 7285 7286 7287 K2 KW41 PA459 PsaV PsaVI
scf_12387_102_contig_7	4545	a	C	C	C	C	C	C	C	C	C	a	346 7285 7286 7287 K2 KW41 PA459 PsaV PsaVI
scf_12387_102_contig_7	5005	t	C	C	C	C	C	C	C	C	C	t	346 7285 7286 7287 K2 KW41 PA459 PsaV PsaVI
scf_12387_102_contig_7	8169	t	C	C	C	C	C	C	C	C	C	t	346 7285 7286 7287 K2 KW41 PA459 PsaV PsaVI
scf_12387_102_contig_9	2423	g	A	A	A	A	A	A	A	A	A	g	346 7285 7286 7287 K2 KW41 PA459 PsaV PsaVI
scf_12387_102_contig_9	3008	t	C	C	C	C	C	C	C	C	C	t	346 7285 7286 7287 K2 KW41 PA459 PsaV PsaVI
scf_12387_102_contig_9	3126	c	T	T	T	T	T	T	T	T	T	c	346 7285 7286 7287 K2 KW41 PA459 PsaV PsaVI
scf_12387_102_contig_9	3180	t	C	C	C	C	C	C	C	C	C	t	346 7285 7286 7287 K2 KW41 PA459 PsaV PsaVI
scf_12387_1060_contig_11	150	g	A	A	A	A	A	A	A	A	A	g	346 7285 7286 7287 K2 KW41 PA459 PsaV PsaVI
scf_12387_1060_contig_1	2031	a	G	G	G	G	G	G	G	G	G	a	346 7285 7286 7287 K2 KW41 PA459 PsaV PsaVI
scf_12387_1060_contig_1	2216	a	G	G	G	G	G	G	G	G	G	a	346 7285 7286 7287 K2 KW41 PA459 PsaV PsaVI
scf_12387_1060_contig_1	2607	a	G	G	G	G	G	G	G	G	G	a	346 7285 7286 7287 K2 KW41 PA459 PsaV PsaVI
scf_12387_1060_contig_1	2754	c	T	T	T	T	T	T	T	T	T	c	346 7285 7286 7287 K2 KW41 PA459 PsaV PsaVI
scf_12387_1060_contig_1	2787	g	A	A	A	A	A	A	A	A	A	g	346 7285 7286 7287 K2 KW41 PA459 PsaV PsaVI
scf_12387_1060_contig_1	2946	a	G	G	G	G	G	G	G	G	G	a	346 7285 7286 7287 K2 KW41 PA459 PsaV PsaVI
scf_12387_1060_contig_1	3027	g	A	A	A	A	A	A	A	A	A	g	346 7285 7286 7287 K2 KW41 PA459 PsaV PsaVI
scf_12387_1060_contig_1	3288	g	A	A	A	A	A	A	A	A	A	g	346 7285 7286 7287 K2 KW41 PA459 PsaV PsaVI
scf_12387_1060_contig_1	3363	a	G	G	G	G	G	G	G	G	G	a	346 7285 7286 7287 K2 KW41 PA459 PsaV PsaVI
scf_12387_1060_contig_1	3366	a	G	G	G	G	G	G	G	G	G	a	346 7285 7286 7287 K2 KW41 PA459 PsaV PsaVI
scf_12387_1060_contig_1	3792	a	C	C	C	C	C	C	C	C	C	a	346 7285 7286 7287 K2 KW41 PA459 PsaV PsaVI
scf_12387_1060_contig_1	4100	c	T	T	T	T	T	T	T	T	T	c	346 7285 7286 7287 K2 KW41 PA459 PsaV PsaVI
scf_12387_1060_contig_1	4238	c	T	T	T	T	T	T	T	T	T	c	346 7285 7286 7287 K2 KW41 PA459 PsaV PsaVI
scf_12387_1060_contig_1	4302	t	C	C	C	C	C	C	C	C	C	t	346 7285 7286 7287 K2 KW41 PA459 PsaV PsaVI
scf_12387_1060_contig_1	4544	c	T	T	T	T	T	T	T	T	T	c	346 7285 7286 7287 K2 KW41 PA459 PsaV PsaVI
scf_12387_1060_contig_1	4841	g	A	A	A	A	A	A	A	A	A	g	346 7285 7286 7287 K2 KW41 PA459 PsaV PsaVI
scf_12387_1060_contig_1	4877	c	T	T	T	T	T	T	T	T	T	c	346 7285 7286 7287 K2 KW41 PA459 PsaV PsaVI
scf_12387_1060_contig_1	5099	a	G	G	G	G	G	G	G	G	G	a	346 7285 7286 7287 K2 KW41 PA459 PsaV PsaVI
scf_12387_1060_contig_1	5357	a	T	T	T	T	T	T	T	T	T	a	346 7285 7286 7287 K2 KW41 PA459 PsaV PsaVI
scf_12387_1060_contig_1	5451	a	G	G	G	G	G	G	G	G	G	a	346 7285 7286 7287 K2 KW41 PA459 PsaV PsaVI
scf_12387_1060_contig_1	5604	a	T	T	T	T	T	T	T	T	T	a	346 7285 7286 7287 K2 KW41 PA459 PsaV PsaVI
scf_12387_1060_contig_1	5646	t	C	C	C	C	C	C	C	C	C	t	346 7285 7286 7287 K2 KW41 PA459 PsaV PsaVI
scf_12387_1060_contig_1	5679	t	C	C	C	C	C	C	C	C	C	t	346 7285 7286 7287 K2 KW41 PA459 PsaV PsaVI
scf_12387_1060_contig_1	5681	g	C	C	C	C	C	C	C	C	C	g	346 7285 7286 7287 K2 KW41 PA459 PsaV PsaVI
scf_12387_1060_contig_1	5879	c	A	A	A	A	A	A	A	A	A	c	346 7285 7286 7287 K2 KW41 PA459 PsaV PsaVI
scf_12387_1060_contig_1	5906	c	T	T	T	T	T	T	T	T	T	c	346 7285 7286 7287 K2 KW41 PA459 PsaV PsaVI
scf_12387_1060_contig_1	5924	c	T	T	T	T	T	T	T	T	T	c	346 7285 7286 7287 K2 KW41 PA459 PsaV PsaVI
scf_12387_1060_contig_1	5972	g	A	A	A	A	A	A	A	A	A	g	346 7285 7286 7287 K2 KW41 PA459 PsaV PsaVI
scf_12387_1060_contig_1	6110	c	T	T	T	T	T	T	T	T	T	c	346 7285 7286 7287 K2 KW41 PA459 PsaV PsaVI
scf_12387_1060_contig_1	6143	c	T	T	T	T	T	T	T	T	T	c	346 7285 7286 7287 K2 KW41 PA459 PsaV PsaVI
scf_12387_1060_contig_1	6521	c	T	T	T	T	T	T	T	T	T	c	346 7285 7286 7287 K2 KW41 PA459 PsaV PsaVI
scf_12387_1060_contig_1	6597	g	T	T	T	T	T	T	T	T	T	g	346 7285 7286 7287 K2 KW41 PA459 PsaV PsaVI
scf_12387_1060_contig_3	1144	t	G	G	G	G	G	G	G	G	G	t	346 7285 7286 7287 K2 KW41 PA459 PsaV PsaVI
scf_12387_1060_contig_3	1505	g	T	T	T	T	T	T	T	T	T	g	346 7285 7286 7287 K2 KW41 PA459 PsaV PsaVI
scf_12387_1060_contig_3	158	t	C	C	C	C	C	C	C	C	C	t	346 7285 7286 7287 K2 KW41 PA459 PsaV PsaVI
scf_12387_1060_contig_3	160	g	A	A	A	A	A	A	A	A	A	g	346 7285 7286 7287 K2 KW41 PA459 PsaV PsaVI
scf_12387_1060_contig_3	1709	a	G	G	G	G	G	G	G	G	G	a	346 7285 7286 7287 K2 KW41 PA459 PsaV PsaVI
scf_12387_1060_contig_3	1916	c	A	A	A	A	A	A	A	A	A	c	346 7285 7286 7287 K2 KW41 PA459 PsaV PsaVI
scf_12387_1060_contig_3	1957	t	C	C	C	C	C	C	C	C	C	t	346 7285 7286 7287 K2 KW41 PA459 PsaV PsaVI
scf_12387_1060_contig_3	266	t	C	C	C	C	C	C	C	C	C	t	346 7285 7286 7287 K2 KW41 PA459 PsaV PsaVI
scf_12387_1060_contig_3	2807	a	G	G	G	G	G	G	G	G	G	a	346 7285 7286 7287 K2 KW41 PA459 PsaV PsaVI
scf_12387_1060_contig_3	290	c	T	T	T	T	T	T	T	T	T	c	346 7285 7286 7287 K2 KW41 PA459 PsaV PsaVI
scf_12387_1060_contig_3	2933	c	T	T	T	T	T	T	T	T	T	c	346 7285 7286 7287 K2 KW41 PA459 PsaV PsaVI
scf_12387_1060_contig_3	566	c	A	A	A	A	A	A	A	A	A	c	346 7285 7286 7287 K2 KW41 PA459 PsaV PsaVI
scf_12387_1060_contig_3	642	g	A	A	A	A	A	A	A	A	A	g	346 7285 7286 7287 K2 KW41 PA459 PsaV PsaVI
scf_12387_1060_contig_3	811	g	A	A	A	A	A	A	A	A	A	g	346 7285 7286 7287 K2 KW41 PA459 PsaV PsaVI
scf_12387_1060_contig_3	854	t	A	A	A	A	A	A	A	A	A	t	346 7285 7286 7287 K2 KW41 PA459 PsaV PsaVI
scf_12387_1060_contig_5	1135	c	T	T	T	T	T	T	T	T	T	c	346 7285 7286 7287 K2 KW41 PA459 PsaV PsaVI
scf_12387_1060_contig_5	1577	c	T	T	T	T	T	T	T	T	T	c	346 7285 7286 7287 K2 KW41 PA459 PsaV PsaVI
scf_12387_1060_contig_5	307	c	T	T	T	T	T	T	T	T	T	c	346 7285 7286 7287 K2 KW41 PA459 PsaV PsaVI
scf_12387_1060_contig_5	379	t	C	C	C	C	C	C	C	C	C	t	346 7285 7286 7287 K2 KW41 PA459 PsaV PsaVI
scf_12387_1060_contig_5	517	t	C	C	C	C	C	C	C	C	C	t	346 7285 7286 7287 K2 KW41 PA459 PsaV PsaVI
scf_12387_1060_contig_5	601	c	G	G	G	G	G	G	G	G	G	c	346 7285 7286 7287 K2 KW41 PA459 PsaV PsaVI
scf_12387_1060_contig_5	642	c	T	T	T	T	T	T	T	T	T	c	346 7285 7286 7287 K2 KW41 PA459 PsaV PsaVI
scf_12387_1060_contig_5	907	c	T	T	T	T	T	T	T	T	T	c	346 7285 7286 7287 K2 KW41 PA459 PsaV PsaVI
scf_12387_1060_contig_7	1309	g	A	A	A	A	A	A	A	A	A	g	346 7285 7286 7287 K2 KW41 PA459 PsaV PsaVI
scf_12387_1060_contig_7	1326	t	C	C	C	C	C	C	C	C	C	t	346 7285 7286 7287 K2 KW41 PA459 PsaV PsaVI
scf_12387_1060_contig_7	258	c	T	T	T	T	T	T	T	T	T	c	346 7285 7286 7287 K2 KW41 PA459 PsaV PsaVI
scf_12387_1060_contig_7	414	c	T	T	T	T	T	T	T	T	T	c	346 7285 7286 7287 K2 KW41 PA459 PsaV PsaVI
scf_12387_1060_contig_9	160	c	T	T	T	T	T	T	T	T	T	c	346 7285 7286 7287 K2 KW41 PA459 PsaV PsaVI
scf_12387_1060_contig_9	296	c	A	A	A	A	A	A	A	A	A	c	346 7285 7286 7287 K2 KW41 PA459 PsaV PsaVI
scf_12387_1060_contig_9	76	c	T	T	T	T	T	T	T	T	T	c	346 7285 7286 7287 K2 KW41 PA459 PsaV PsaVI
scf_12387_1096_contig_11	1190	c	G	G	G	G	G	G	G	G	G	c	346 7285 7286 7287 K2 KW41 PA459 PsaV PsaVI
scf_12387_1096_contig_11	2693	c	T	T	T	T	T	T	T	T	T	c	346 7285 7286 7287 K2 KW41 PA459 PsaV PsaVI
scf_12387_1096_contig_11	3014	c	T	T	T	T	T	T	T	T	T	c	346 7285 7286 7287 K2 KW41 PA459 PsaV PsaVI
scf_12387_1096_contig_11	3062	c	T	T	T	T	T	T	T	T	T	c	346 7285 7286 7287 K2 KW41 PA459 PsaV PsaVI
scf_12387_1096_contig_11	3182	g	A	A	A	A	A	A	A	A	A	g	346 7285 7286 7287 K2 KW41 PA459 PsaV PsaVI
scf_12387_1096_contig_11	3200	t	C	C	C	C	C	C	C	C	C	t	346 7285 7286 7287 K2 KW41 PA459 PsaV PsaVI
scf_12387_1096_contig_11	3460	g	A	A	A	A	A	A	A	A	A	g	346 7285 7286 7287 K2 KW41 PA459 PsaV PsaVI
scf_12387_1096_contig_11	3473	a	G	G	G	G	G	G	G	G	G	a	346 7285 7286 7287 K2 KW41 PA459 PsaV PsaVI
scf_12387_1096_contig_11	3942	t	C	C	C	C	C	C	C	C	C	t	346 7285 7286 7287 K2 KW41 PA459 PsaV PsaVI
scf_12387_1096_contig_11	466	t	G	G	G	G	G	G	G	G	G	t	346 7285 7286 7287 K2 KW41 PA459 PsaV PsaVI
scf_12387_1096_contig_11	5041	g	T	T	T	T	T	T	T	T	T	g	346 7285 7286 7287 K2 KW41 PA459 PsaV PsaVI
scf_12387_1096_contig_11	5044	a	C	C	C	C	C	C	C	C	C	a	346 7285 7286 7287 K2 KW41 PA459 PsaV PsaVI
scf_12387_1096_contig_11	5060	t	C	C	C	C	C	C	C	C	C	t	346 7285 7286 7287 K2 KW41 PA459 PsaV PsaVI
scf_12387_1096_contig_11	5464	g	A	A	A	A	A	A	A	A	A	g	346 7285 7286 7287 K2 KW41 PA459 PsaV PsaVI
scf_12387_1096_contig_11	5861	c	T	T	T	T	T	T	T	T	T	c	346 7285 7286 7287 K2 KW41 PA459 PsaV PsaVI
scf_12387_1096_contig_11	5900	g	A	A	A	A	A	A	A	A	A	g	346 7285 7286 7287 K2 KW41 PA459 PsaV PsaVI
scf_12387_1096_contig_11	6032	c	T	T	T	T	T	T	T	T	T	c	346 7285 7286 7287 K2 KW41 PA459 PsaV PsaVI
scf_12387_1096_contig_11	6050	t	G	G	G	G	G	G	G	G	G	t	346 7285 7286 7287 K2 KW41 PA459 PsaV PsaVI
scf_12387_1096_contig_11	6170	a	G	G	G	G	G	G	G	G	G	a	346 7285 7286 7287 K2 KW41 PA459 PsaV PsaVI
scf_12387_1096_contig_11	6417	a	G	G	G	G	G	G	G	G	G	a	346 7285 7286 7287 K2 KW41 PA459 PsaV PsaVI
scf_12387_1096_contig_11	6545	g	T	T	T	T	T	T	T	T	T	g	346 7285 7286 7287 K2 KW41 PA459 PsaV PsaVI
scf_12387_1096_contig_11	6704	g	A	A	A	A	A	A	A	A	A	g	346 7285 7286 7287 K2 KW41 PA459 PsaV PsaVI
scf_12387_1096_contig_11	7900	g	C	C	C	C	C	C	C	C	C	g	346 7285 7286 7287 K2 KW41 PA459 PsaV PsaVI
scf_12387_1096_contig_11	7909	a	T	T	T	T	T	T	T	T	T	a	346 7285 7286 7287 K2 KW41 PA459 PsaV PsaVI
scf_12387_1096_contig_11	7954	t	A	A	A	A	A	A	A	A	A	t	346 7285 7286 7287 K2 KW41 PA459 PsaV PsaVI
scf_12387_1096_contig_13	3581	c	T	T	T	T	T	T	T	T	T	c	346 7285 7286 7287 K2 KW41 PA459 PsaV PsaVI
scf_12387_1096_contig_13	3942	c	T	T	T	T	T	T	T	T	T	c	346 7285 7286 7287 K2 KW41 PA459 PsaV PsaVI
scf_12387_1096_contig_13	3975	a	G	G	G	G	G	G	G	G	G	a	346 7285 7286 7287 K2 KW41 PA459 PsaV PsaVI
scf_12387_1096_contig_13	3990	c	A	A	A	A	A	A	A	A	A	c	346 7285 7286 7287 K2 KW41 PA459 PsaV PsaVI
scf_12387_1096_contig_13	4412	a	G	G	G	G	G	G	G	G	G	a	346 7285 7286 7287 K2 KW41 PA459 PsaV PsaVI
scf_12387_1096_contig_13	4787	c	A	A	A	A	A	A	A	A	A	c	346 7285 7286 7287 K2 KW41 PA459 PsaV PsaVI
scf_12387_1096_contig_13	665	t	C	C	C	C	C	C	C	C	C	t	346 7285 7286 7287 K2 KW41 PA459 PsaV PsaVI
scf_12387_1096_contig_1	1240	c	T	T	T	T	T	T	T	T	T	c	346 7285 7286 7287 K2 KW41 PA459 PsaV PsaVI
scf_12387_1096_contig_1	1245	c	T	T	T	T	T	T	T	T	T	c	346 7285 7286 7287 K2 KW41 PA459 PsaV PsaVI
scf_12387_1096_contig_1	3234	a	C	C	C	C	C	C	C	C	C	a	346 7285 7286 7287 K2 KW41 PA459 PsaV PsaVI
scf_12387_1096_contig_1	540	a	G	G	G	G	G	G	G	G	G	a	346 7285 7286 7287 K2 KW41 PA459 PsaV PsaVI
scf_12387_1096_contig_1	580	t	C	C	C	C	C	C	C	C	C	t	346 7285 7286 7287 K2 KW41 PA459 PsaV PsaVI
scf_12387_1096_contig_1	625	a	G	G	G	G	G	G	G	G	G	a	346 7285 7286 7287 K2 KW41 PA459 PsaV PsaVI
scf_12387_1096_contig_3	1213	t	G	G	G	G	G	G	G	G	G	t	346 7285 7286 7287 K2 KW41 PA459 PsaV PsaVI
scf_12387_1096_contig_3	1622	c	T	T	T	T	T	T	T	T	T	c	346 7285 7286 7287 K2 KW41 PA459 PsaV PsaVI
scf_12387_1096_contig_3	3318	c	A	A	A	A	A	A	A	A	A	c	346 7285 7286 7287 K2 KW41 PA459 PsaV PsaVI
scf_12387_1096_contig_3	403	c	G	G	G	G	G	G	G	G	G	c	346 7285 7286 7287 K2 KW41 PA459 PsaV PsaVI
scf_12387_1096_contig_3	788	g	A	A	A	A	A	A	A	A	A	g	346 7285 7286 7287 K2 KW41 PA459 PsaV PsaVI
scf_12387_1096_contig_5	1810	a	G	G	G	G	G	G	G	G	G	a	346 7285 7286 7287 K2 KW41 PA459 PsaV PsaVI
scf_12387_1096_contig_5	1880	a	G	G	G	G	G	G	G	G	G	a	346 7285 7286 7287 K2 KW41 PA459 PsaV PsaVI
scf_12387_1096_contig_5	2001	g	A	A	A	A	A	A	A	A	A	g	346 7285 7286 7287 K2 KW41 PA459 PsaV PsaVI
scf_12387_1096_contig_5	2052	c	T	T	T	T	T	T	T	T	T	c	346 7285 7286 7287 K2 KW41 PA459 PsaV PsaVI
scf_12387_1096_contig_5	2076	c	T	T	T	T	T	T	T	T	T	c	346 7285 7286 7287 K2 KW41 PA459 PsaV PsaVI
scf_12387_1096_contig_7	4144	t	C	C	C	C	C	C	C	C	C	t	346 7285 7286 7287 K2 KW41 PA459 PsaV PsaVI
scf_12387_1096_contig_7	4634	c	T	T	T	T	T	T	T	T	T	c	346 7285 7286 7287 K2 KW41 PA459 PsaV PsaVI
scf_12387_1096_contig_7	4736	c	T	T	T	T	T	T	T	T	T	c	346 7285 7286 7287 K2 KW41 PA459 PsaV PsaVI
scf_12387_1096_contig_7	6149	g	A	A	A	A	A	A	A	A	A	g	346 7285 7286 7287 K2 KW41 PA459 PsaV PsaVI
scf_12387_1096_contig_7	6160	t	G	G	G	G	G	G	G	G	G	t	346 7285 7286 7287 K2 KW41 PA459 PsaV PsaVI
scf_12387_1096_contig_7	6536	c	T	T	T	T	T	T	T	T	T	c	346 7285 7286 7287 K2 KW41 PA459 PsaV PsaVI
scf_12387_1096_contig_7	7006	c	T	T	T	T	T	T	T	T	T	c	346 7285 7286 7287 K2 KW41 PA459 PsaV PsaVI
scf_12387_1102_contig_11	1027	a	T	T	T	T	T	T	T	T	T	a	346 7285 7286 7287 K2 KW41 PA459 PsaV PsaVI
scf_12387_1102_contig_11	1197	g	A	A	A	A	A	A	A	A	A	g	346 7285 7286 7287 K2 KW41 PA459 PsaV PsaVI
scf_12387_1102_contig_11	1208	g	A	A	A	A	A	A	A	A	A	g	346 7285 7286 7287 K2 KW41 PA459 PsaV PsaVI
scf_12387_1102_contig_11	1236	g	C	C	C	C	C	C	C	C	C	g	346 7285 7286 7287 K2 KW41 PA459 PsaV PsaVI
scf_12387_1102_contig_11	1434	t	C	C	C	C	C	C	C	C	C	t	346 7285 7286 7287 K2 KW41 PA459 PsaV PsaVI
scf_12387_1102_contig_11	1463	g	A	A	A	A	A	A	A	A	A	g	346 7285 7286 7287 K2 KW41 PA459 PsaV PsaVI
scf_12387_1102_contig_11	2079	c	G	G	G	G	G	G	G	G	G	c	346 7285 7286 7287 K2 KW41 PA459 PsaV PsaVI
scf_12387_1102_contig_11	2205	c	A	A	A	A	A	A	A	A	A	c	346 7285 7286 7287 K2 KW41 PA459 PsaV PsaVI
scf_12387_1102_contig_11	2364	c	T	T	T	T	T	T	T	T	T	c	346 7285 7286 7287 K2 KW41 PA459 PsaV PsaVI
scf_12387_1102_contig_11	239	a	C	C	C	C	C	C	C	C	C	a	346 7285 7286 7287 K2 KW41 PA459 PsaV PsaVI
scf_12387_1102_contig_11	2390	g	A	A	A	A	A	A	A	A	A	g	346 7285 7286 7287 K2 KW41 PA459 PsaV PsaVI
scf_12387_1102_contig_11	2415	t	G	G	G	G	G	G	G	G	G	t	346 7285 7286 7287 K2 KW41 PA459 PsaV PsaVI
scf_12387_1102_contig_11	2481	g	A	A	A	A	A	A	A	A	A	g	346 7285 7286 7287 K2 KW41 PA459 PsaV PsaVI
scf_12387_1102_contig_11	254	c	T	T	T	T	T	T	T	T	T	c	346 7285 7286 7287 K2 KW41 PA459 PsaV PsaVI
scf_12387_1102_contig_11	2569	a	G	G	G	G	G	G	G	G	G	a	346 7285 7286 7287 K2 KW41 PA459 PsaV PsaVI
scf_12387_1102_contig_11	2774	a	G	G	G	G	G	G	G	G	G	a	346 7285 7286 7287 K2 KW41 PA459 PsaV PsaVI
scf_12387_1102_contig_11	3362	g	A	A	A	A	A	A	A	A	A	g	346 7285 7286 7287 K2 KW41 PA459 PsaV PsaVI
scf_12387_1102_contig_11	3515	g	A	A	A	A	A	A	A	A	A	g	346 7285 7286 7287 K2 KW41 PA459 PsaV PsaVI
scf_12387_1102_contig_11	3580	t	C	C	C	C	C	C	C	C	C	t	346 7285 7286 7287 K2 KW41 PA459 PsaV PsaVI
scf_12387_1102_contig_11	3668	c	A	A	A	A	A	A	A	A	A	c	346 7285 7286 7287 K2 KW41 PA459 PsaV PsaVI
scf_12387_1102_contig_11	4015	a	G	G	G	G	G	G	G	G	G	a	346 7285 7286 7287 K2 KW41 PA459 PsaV PsaVI
scf_12387_1102_contig_11	4138	g	A	A	A	A	A	A	A	A	A	g	346 7285 7286 7287 K2 KW41 PA459 PsaV PsaVI
scf_12387_1102_contig_11	4369	a	C	C	C	C	C	C	C	C	C	a	346 7285 7286 7287 K2 KW41 PA459 PsaV PsaVI
scf_12387_1102_contig_11	4591	c	A	A	A	A	A	A	A	A	A	c	346 7285 7286 7287 K2 KW41 PA459 PsaV PsaVI
scf_12387_1102_contig_11	472	g	A	A	A	A	A	A	A	A	A	g	346 7285 7286 7287 K2 KW41 PA459 PsaV PsaVI
scf_12387_1102_contig_11	4819	c	G	G	G	G	G	G	G	G	G	c	346 7285 7286 7287 K2 KW41 PA459 PsaV PsaVI
scf_12387_1102_contig_11	979	a	G	G	G	G	G	G	G	G	G	a	346 7285 7286 7287 K2 KW41 PA459 PsaV PsaVI
scf_12387_1102_contig_13	1118	g	A	A	A	A	A	A	A	A	A	g	346 7285 7286 7287 K2 KW41 PA459 PsaV PsaVI
scf_12387_1102_contig_13	1661	c	G	G	G	G	G	G	G	G	G	c	346 7285 7286 7287 K2 KW41 PA459 PsaV PsaVI
scf_12387_1102_contig_13	1716	t	G	G	G	G	G	G	G	G	G	t	346 7285 7286 7287 K2 KW41 PA459 PsaV PsaVI
scf_12387_1102_contig_15	2183	g	C	C	C	C	C	C	C	C	C	g	346 7285 7286 7287 K2 KW41 PA459 PsaV PsaVI
scf_12387_1102_contig_15	2195	g	A	A	A	A	A	A	A	A	A	g	346 7285 7286 7287 K2 KW41 PA459 PsaV PsaVI
scf_12387_1102_contig_15	3165	c	T	T	T	T	T	T	T	T	T	c	346 7285 7286 7287 K2 KW41 PA459 PsaV PsaVI
scf_12387_1102_contig_15	3186	t	G	G	G	G	G	G	G	G	G	t	346 7285 7286 7287 K2 KW41 PA459 PsaV PsaVI
scf_12387_1102_contig_15	3897	c	A	A	A	A	A	A	A	A	A	c	346 7285 7286 7287 K2 KW41 PA459 PsaV PsaVI
scf_12387_1102_contig_15	452	a	G	G	G	G	G	G	G	G	G	a	346 7285 7286 7287 K2 KW41 PA459 PsaV PsaVI
scf_12387_1102_contig_15	668	a	G	G	G	G	G	G	G	G	G	a	346 7285 7286 7287 K2 KW41 PA459 PsaV PsaVI
scf_12387_1102_contig_15	704	a	G	G	G	G	G	G	G	G	G	a	346 7285 7286 7287 K2 KW41 PA459 PsaV PsaVI
scf_12387_1102_contig_17	1036	g	A	A	A	A	A	A	A	A	A	g	346 7285 7286 7287 K2 KW41 PA459 PsaV PsaVI
scf_12387_1102_contig_17	1417	t	C	C	C	C	C	C	C	C	C	t	346 7285 7286 7287 K2 KW41 PA459 PsaV PsaVI
scf_12387_1102_contig_17	147	a	G	G	G	G	G	G	G	G	G	a	346 7285 7286 7287 K2 KW41 PA459 PsaV PsaVI
scf_12387_1102_contig_17	1489	a	C	C	C	C	C	C	C	C	C	a	346 7285 7286 7287 K2 KW41 PA459 PsaV PsaVI
scf_12387_1102_contig_17	1552	g	C	C	C	C	C	C	C	C	C	g	346 7285 7286 7287 K2 KW41 PA459 PsaV PsaVI
scf_12387_1102_contig_17	1600	a	G	G	G	G	G	G	G	G	G	a	346 7285 7286 7287 K2 KW41 PA459 PsaV PsaVI
scf_12387_1102_contig_17	1693	c	A	A	A	A	A	A	A	A	A	c	346 7285 7286 7287 K2 KW41 PA459 PsaV PsaVI
scf_12387_1102_contig_17	1713	g	A	A	A	A	A	A	A	A	A	g	346 7285 7286 7287 K2 KW41 PA459 PsaV PsaVI
scf_12387_1102_contig_17	1828	a	G	G	G	G	G	G	G	G	G	a	346 7285 7286 7287 K2 KW41 PA459 PsaV PsaVI
scf_12387_1102_contig_17	1875	t	C	C	C	C	C	C	C	C	C	t	346 7285 7286 7287 K2 KW41 PA459 PsaV PsaVI
scf_12387_1102_contig_17	1924	c	T	T	T	T	T	T	T	T	T	c	346 7285 7286 7287 K2 KW41 PA459 PsaV PsaVI
scf_12387_1102_contig_17	1927	a	G	G	G	G	G	G	G	G	G	a	346 7285 7286 7287 K2 KW41 PA459 PsaV PsaVI
scf_12387_1102_contig_17	1969	g	A	A	A	A	A	A	A	A	A	g	346 7285 7286 7287 K2 KW41 PA459 PsaV PsaVI
scf_12387_1102_contig_17	1978	g	A	A	A	A	A	A	A	A	A	g	346 7285 7286 7287 K2 KW41 PA459 PsaV PsaVI
scf_12387_1102_contig_17	2673	a	T	T	T	T	T	T	T	T	T	a	346 7285 7286 7287 K2 KW41 PA459 PsaV PsaVI
scf_12387_1102_contig_17	271	g	A	A	A	A	A	A	A	A	A	g	346 7285 7286 7287 K2 KW41 PA459 PsaV PsaVI
scf_12387_1102_contig_17	2846	c	A	A	A	A	A	A	A	A	A	c	346 7285 7286 7287 K2 KW41 PA459 PsaV PsaVI
scf_12387_1102_contig_17	2972	a	G	G	G	G	G	G	G	G	G	a	346 7285 7286 7287 K2 KW41 PA459 PsaV PsaVI
scf_12387_1102_contig_17	3551	t	C	C	C	C	C	C	C	C	C	t	346 7285 7286 7287 K2 KW41 PA459 PsaV PsaVI
scf_12387_1102_contig_17	3668	a	G	G	G	G	G	G	G	G	G	a	346 7285 7286 7287 K2 KW41 PA459 PsaV PsaVI
scf_12387_1102_contig_17	3686	t	G	G	G	G	G	G	G	G	G	t	346 7285 7286 7287 K2 KW41 PA459 PsaV PsaVI
scf_12387_1102_contig_17	3926	g	A	A	A	A	A	A	A	A	A	g	346 7285 7286 7287 K2 KW41 PA459 PsaV PsaVI
scf_12387_1102_contig_17	3977	g	A	A	A	A	A	A	A	A	A	g	346 7285 7286 7287 K2 KW41 PA459 PsaV PsaVI
scf_12387_1102_contig_17	3990	c	G	G	G	G	G	G	G	G	G	c	346 7285 7286 7287 K2 KW41 PA459 PsaV PsaVI
scf_12387_1102_contig_17	4235	c	T	T	T	T	T	T	T	T	T	c	346 7285 7286 7287 K2 KW41 PA459 PsaV PsaVI
scf_12387_1102_contig_17	4436	a	G	G	G	G	G	G	G	G	G	a	346 7285 7286 7287 K2 KW41 PA459 PsaV PsaVI
scf_12387_1102_contig_17	59	c	T	T	T	T	T	T	T	T	T	c	346 7285 7286 7287 K2 KW41 PA459 PsaV PsaVI
scf_12387_1102_contig_17	642	c	T	T	T	T	T	T	T	T	T	c	346 7285 7286 7287 K2 KW41 PA459 PsaV PsaVI
scf_12387_1102_contig_17	682	t	C	C	C	C	C	C	C	C	C	t	346 7285 7286 7287 K2 KW41 PA459 PsaV PsaVI
scf_12387_1102_contig_17	705	t	C	C	C	C	C	C	C	C	C	t	346 7285 7286 7287 K2 KW41 PA459 PsaV PsaVI
scf_12387_1102_contig_17	731	t	C	C	C	C	C	C	C	C	C	t	346 7285 7286 7287 K2 KW41 PA459 PsaV PsaVI
scf_12387_1102_contig_19	367	g	A	A	A	A	A	A	A	A	A	g	346 7285 7286 7287 K2 KW41 PA459 PsaV PsaVI
scf_12387_1102_contig_1	317	a	G	G	G	G	G	G	G	G	G	a	346 7285 7286 7287 K2 KW41 PA459 PsaV PsaVI
scf_12387_1102_contig_1	602	g	A	A	A	A	A	A	A	A	A	g	346 7285 7286 7287 K2 KW41 PA459 PsaV PsaVI
scf_12387_1102_contig_1	640	g	A	A	A	A	A	A	A	A	A	g	346 7285 7286 7287 K2 KW41 PA459 PsaV PsaVI
scf_12387_1102_contig_1	680	a	G	G	G	G	G	G	G	G	G	a	346 7285 7286 7287 K2 KW41 PA459 PsaV PsaVI
scf_12387_1102_contig_1	836	g	A	A	A	A	A	A	A	A	A	g	346 7285 7286 7287 K2 KW41 PA459 PsaV PsaVI
scf_12387_1102_contig_21	192	c	A	A	A	A	A	A	A	A	A	c	346 7285 7286 7287 K2 KW41 PA459 PsaV PsaVI
scf_12387_1102_contig_21	23	c	T	T	T	T	T	T	T	T	T	c	346 7285 7286 7287 K2 KW41 PA459 PsaV PsaVI
scf_12387_1102_contig_21	434	a	G	G	G	G	G	G	G	G	G	a	346 7285 7286 7287 K2 KW41 PA459 PsaV PsaVI
scf_12387_1102_contig_21	564	c	A	A	A	A	A	A	A	A	A	c	346 7285 7286 7287 K2 KW41 PA459 PsaV PsaVI
scf_12387_1102_contig_21	654	t	C	C	C	C	C	C	C	C	C	t	346 7285 7286 7287 K2 KW41 PA459 PsaV PsaVI
scf_12387_1102_contig_23	310	t	C	C	C	C	C	C	C	C	C	t	346 7285 7286 7287 K2 KW41 PA459 PsaV PsaVI
scf_12387_1102_contig_23	436	g	A	A	A	A	A	A	A	A	A	g	346 7285 7286 7287 K2 KW41 PA459 PsaV PsaVI
scf_12387_1102_contig_25	1112	a	G	G	G	G	G	G	G	G	G	a	346 7285 7286 7287 K2 KW41 PA459 PsaV PsaVI
scf_12387_1102_contig_25	211	a	G	G	G	G	G	G	G	G	G	a	346 7285 7286 7287 K2 KW41 PA459 PsaV PsaVI
scf_12387_1102_contig_27	1089	c	T	T	T	T	T	T	T	T	T	c	346 7285 7286 7287 K2 KW41 PA459 PsaV PsaVI
scf_12387_1102_contig_27	1243	a	G	G	G	G	G	G	G	G	G	a	346 7285 7286 7287 K2 KW41 PA459 PsaV PsaVI
scf_12387_1102_contig_27	1501	g	A	A	A	A	A	A	A	A	A	g	346 7285 7286 7287 K2 KW41 PA459 PsaV PsaVI
scf_12387_1102_contig_27	1612	g	A	A	A	A	A	A	A	A	A	g	346 7285 7286 7287 K2 KW41 PA459 PsaV PsaVI
scf_12387_1102_contig_27	1618	g	A	A	A	A	A	A	A	A	A	g	346 7285 7286 7287 K2 KW41 PA459 PsaV PsaVI
scf_12387_1102_contig_27	1831	a	C	C	C	C	C	C	C	C	C	a	346 7285 7286 7287 K2 KW41 PA459 PsaV PsaVI
scf_12387_1102_contig_27	2065	g	T	T	T	T	T	T	T	T	T	g	346 7285 7286 7287 K2 KW41 PA459 PsaV PsaVI
scf_12387_1102_contig_27	2125	g	A	A	A	A	A	A	A	A	A	g	346 7285 7286 7287 K2 KW41 PA459 PsaV PsaVI
scf_12387_1102_contig_27	2172	g	A	A	A	A	A	A	A	A	A	g	346 7285 7286 7287 K2 KW41 PA459 PsaV PsaVI
scf_12387_1102_contig_27	231	a	G	G	G	G	G	G	G	G	G	a	346 7285 7286 7287 K2 KW41 PA459 PsaV PsaVI
scf_12387_1102_contig_27	2539	a	G	G	G	G	G	G	G	G	G	a	346 7285 7286 7287 K2 KW41 PA459 PsaV PsaVI
scf_12387_1102_contig_27	282	c	T	T	T	T	T	T	T	T	T	c	346 7285 7286 7287 K2 KW41 PA459 PsaV PsaVI
scf_12387_1102_contig_27	2961	t	C	C	C	C	C	C	C	C	C	t	346 7285 7286 7287 K2 KW41 PA459 PsaV PsaVI
scf_12387_1102_contig_27	3015	a	G	G	G	G	G	G	G	G	G	a	346 7285 7286 7287 K2 KW41 PA459 PsaV PsaVI
scf_12387_1102_contig_27	306	a	G	G	G	G	G	G	G	G	G	a	346 7285 7286 7287 K2 KW41 PA459 PsaV PsaVI
scf_12387_1102_contig_27	3147	a	G	G	G	G	G	G	G	G	G	a	346 7285 7286 7287 K2 KW41 PA459 PsaV PsaVI
scf_12387_1102_contig_27	390	c	A	A	A	A	A	A	A	A	A	c	346 7285 7286 7287 K2 KW41 PA459 PsaV PsaVI
scf_12387_1102_contig_27	402	g	A	A	A	A	A	A	A	A	A	g	346 7285 7286 7287 K2 KW41 PA459 PsaV PsaVI
scf_12387_1102_contig_27	459	a	G	G	G	G	G	G	G	G	G	a	346 7285 7286 7287 K2 KW41 PA459 PsaV PsaVI
scf_12387_1102_contig_27	5029	t	G	G	G	G	G	G	G	G	G	t	346 7285 7286 7287 K2 KW41 PA459 PsaV PsaVI
scf_12387_1102_contig_27	907	a	G	G	G	G	G	G	G	G	G	a	346 7285 7286 7287 K2 KW41 PA459 PsaV PsaVI
scf_12387_1102_contig_29	40	g	A	A	A	A	A	A	A	A	A	g	346 7285 7286 7287 K2 KW41 PA459 PsaV PsaVI
scf_12387_1102_contig_31	1046	c	T	T	T	T	T	T	T	T	T	c	346 7285 7286 7287 K2 KW41 PA459 PsaV PsaVI
scf_12387_1102_contig_31	1128	t	C	C	C	C	C	C	C	C	C	t	346 7285 7286 7287 K2 KW41 PA459 PsaV PsaVI
scf_12387_1102_contig_31	429	a	C	C	C	C	C	C	C	C	C	a	346 7285 7286 7287 K2 KW41 PA459 PsaV PsaVI
scf_12387_1102_contig_31	468	g	A	A	A	A	A	A	A	A	A	g	346 7285 7286 7287 K2 KW41 PA459 PsaV PsaVI
scf_12387_1102_contig_33	1253	a	T	T	T	T	T	T	T	T	T	a	346 7285 7286 7287 K2 KW41 PA459 PsaV PsaVI
scf_12387_1102_contig_33	1355	g	A	A	A	A	A	A	A	A	A	g	346 7285 7286 7287 K2 KW41 PA459 PsaV PsaVI
scf_12387_1102_contig_33	1562	g	T	T	T	T	T	T	T	T	T	g	346 7285 7286 7287 K2 KW41 PA459 PsaV PsaVI
scf_12387_1102_contig_33	1679	a	G	G	G	G	G	G	G	G	G	a	346 7285 7286 7287 K2 KW41 PA459 PsaV PsaVI
scf_12387_1102_contig_33	1736	c	T	T	T	T	T	T	T	T	T	c	346 7285 7286 7287 K2 KW41 PA459 PsaV PsaVI
scf_12387_1102_contig_33	1984	c	T	T	T	T	T	T	T	T	T	c	346 7285 7286 7287 K2 KW41 PA459 PsaV PsaVI
scf_12387_1102_contig_33	2174	a	G	G	G	G	G	G	G	G	G	a	346 7285 7286 7287 K2 KW41 PA459 PsaV PsaVI
scf_12387_1102_contig_33	2339	g	A	A	A	A	A	A	A	A	A	g	346 7285 7286 7287 K2 KW41 PA459 PsaV PsaVI
scf_12387_1102_contig_33	2570	a	G	G	G	G	G	G	G	G	G	a	346 7285 7286 7287 K2 KW41 PA459 PsaV PsaVI
scf_12387_1102_contig_33	2615	a	G	G	G	G	G	G	G	G	G	a	346 7285 7286 7287 K2 KW41 PA459 PsaV PsaVI
scf_12387_1102_contig_33	3678	a	C	C	C	C	C	C	C	C	C	a	346 7285 7286 7287 K2 KW41 PA459 PsaV PsaVI
scf_12387_1102_contig_33	3887	g	A	A	A	A	A	A	A	A	A	g	346 7285 7286 7287 K2 KW41 PA459 PsaV PsaVI
scf_12387_1102_contig_33	4344	c	T	T	T	T	T	T	T	T	T	c	346 7285 7286 7287 K2 KW41 PA459 PsaV PsaVI
scf_12387_1102_contig_33	4758	a	G	G	G	G	G	G	G	G	G	a	346 7285 7286 7287 K2 KW41 PA459 PsaV PsaVI
scf_12387_1102_contig_33	4913	g	A	A	A	A	A	A	A	A	A	g	346 7285 7286 7287 K2 KW41 PA459 PsaV PsaVI
scf_12387_1102_contig_33	4949	t	C	C	C	C	C	C	C	C	C	t	346 7285 7286 7287 K2 KW41 PA459 PsaV PsaVI
scf_12387_1102_contig_33	5093	t	C	C	C	C	C	C	C	C	C	t	346 7285 7286 7287 K2 KW41 PA459 PsaV PsaVI
scf_12387_1102_contig_33	5867	c	G	G	G	G	G	G	G	G	G	c	346 7285 7286 7287 K2 KW41 PA459 PsaV PsaVI
scf_12387_1102_contig_33	622	g	A	A	A	A	A	A	A	A	A	g	346 7285 7286 7287 K2 KW41 PA459 PsaV PsaVI
scf_12387_1102_contig_33	6425	c	A	A	A	A	A	A	A	A	A	c	346 7285 7286 7287 K2 KW41 PA459 PsaV PsaVI
scf_12387_1102_contig_33	6982	c	T	T	T	T	T	T	T	T	T	c	346 7285 7286 7287 K2 KW41 PA459 PsaV PsaVI
scf_12387_1102_contig_33	820	g	A	A	A	A	A	A	A	A	A	g	346 7285 7286 7287 K2 KW41 PA459 PsaV PsaVI
scf_12387_1102_contig_3	1065	a	C	C	C	C	C	C	C	C	C	a	346 7285 7286 7287 K2 KW41 PA459 PsaV PsaVI
scf_12387_1102_contig_3	1072	g	T	T	T	T	T	T	T	T	T	g	346 7285 7286 7287 K2 KW41 PA459 PsaV PsaVI
scf_12387_1102_contig_3	1074	t	C	C	C	C	C	C	C	C	C	t	346 7285 7286 7287 K2 KW41 PA459 PsaV PsaVI
scf_12387_1102_contig_3	1602	c	T	T	T	T	T	T	T	T	T	c	346 7285 7286 7287 K2 KW41 PA459 PsaV PsaVI
scf_12387_1102_contig_3	1677	a	G	G	G	G	G	G	G	G	G	a	346 7285 7286 7287 K2 KW41 PA459 PsaV PsaVI
scf_12387_1102_contig_3	1695	g	A	A	A	A	A	A	A	A	A	g	346 7285 7286 7287 K2 KW41 PA459 PsaV PsaVI
scf_12387_1102_contig_3	172	g	A	A	A	A	A	A	A	A	A	g	346 7285 7286 7287 K2 KW41 PA459 PsaV PsaVI
scf_12387_1102_contig_3	1896	t	C	C	C	C	C	C	C	C	C	t	346 7285 7286 7287 K2 KW41 PA459 PsaV PsaVI
scf_12387_1102_contig_3	1920	g	C	C	C	C	C	C	C	C	C	g	346 7285 7286 7287 K2 KW41 PA459 PsaV PsaVI
scf_12387_1102_contig_3	202	c	A	A	A	A	A	A	A	A	A	c	346 7285 7286 7287 K2 KW41 PA459 PsaV PsaVI
scf_12387_1102_contig_3	2247	g	C	C	C	C	C	C	C	C	C	g	346 7285 7286 7287 K2 KW41 PA459 PsaV PsaVI
scf_12387_1102_contig_3	2445	c	A	A	A	A	A	A	A	A	A	c	346 7285 7286 7287 K2 KW41 PA459 PsaV PsaVI
scf_12387_1102_contig_3	2532	g	A	A	A	A	A	A	A	A	A	g	346 7285 7286 7287 K2 KW41 PA459 PsaV PsaVI
scf_12387_1102_contig_3	2673	g	A	A	A	A	A	A	A	A	A	g	346 7285 7286 7287 K2 KW41 PA459 PsaV PsaVI
scf_12387_1102_contig_3	3021	c	A	A	A	A	A	A	A	A	A	c	346 7285 7286 7287 K2 KW41 PA459 PsaV PsaVI
scf_12387_1102_contig_3	3100	c	T	T	T	T	T	T	T	T	T	c	346 7285 7286 7287 K2 KW41 PA459 PsaV PsaVI
scf_12387_1102_contig_3	3165	a	G	G	G	G	G	G	G	G	G	a	346 7285 7286 7287 K2 KW41 PA459 PsaV PsaVI
scf_12387_1102_contig_3	3166	g	A	A	A	A	A	A	A	A	A	g	346 7285 7286 7287 K2 KW41 PA459 PsaV PsaVI
scf_12387_1102_contig_3	3394	g	A	A	A	A	A	A	A	A	A	g	346 7285 7286 7287 K2 KW41 PA459 PsaV PsaVI
scf_12387_1102_contig_3	3448	g	A	A	A	A	A	A	A	A	A	g	346 7285 7286 7287 K2 KW41 PA459 PsaV PsaVI
scf_12387_1102_contig_3	3554	c	A	A	A	A	A	A	A	A	A	c	346 7285 7286 7287 K2 KW41 PA459 PsaV PsaVI
scf_12387_1102_contig_3	3734	g	T	T	T	T	T	T	T	T	T	g	346 7285 7286 7287 K2 KW41 PA459 PsaV PsaVI
scf_12387_1102_contig_3	40	c	T	T	T	T	T	T	T	T	T	c	346 7285 7286 7287 K2 KW41 PA459 PsaV PsaVI
scf_12387_1102_contig_3	4190	c	T	T	T	T	T	T	T	T	T	c	346 7285 7286 7287 K2 KW41 PA459 PsaV PsaVI
scf_12387_1102_contig_3	76	c	T	T	T	T	T	T	T	T	T	c	346 7285 7286 7287 K2 KW41 PA459 PsaV PsaVI
scf_12387_1102_contig_43	594	t	C	C	C	C	C	C	C	C	C	t	346 7285 7286 7287 K2 KW41 PA459 PsaV PsaVI
scf_12387_1102_contig_43	605	c	T	T	T	T	T	T	T	T	T	c	346 7285 7286 7287 K2 KW41 PA459 PsaV PsaVI
scf_12387_1102_contig_7	200	g	A	A	A	A	A	A	A	A	A	g	346 7285 7286 7287 K2 KW41 PA459 PsaV PsaVI
scf_12387_1102_contig_7	23	c	A	A	A	A	A	A	A	A	A	c	346 7285 7286 7287 K2 KW41 PA459 PsaV PsaVI
scf_12387_1102_contig_7	26	a	G	G	G	G	G	G	G	G	G	a	346 7285 7286 7287 K2 KW41 PA459 PsaV PsaVI
scf_12387_1102_contig_7	482	g	C	C	C	C	C	C	C	C	C	g	346 7285 7286 7287 K2 KW41 PA459 PsaV PsaVI
scf_12387_1102_contig_9	1125	a	G	G	G	G	G	G	G	G	G	a	346 7285 7286 7287 K2 KW41 PA459 PsaV PsaVI
scf_12387_1102_contig_9	114	c	A	A	A	A	A	A	A	A	A	c	346 7285 7286 7287 K2 KW41 PA459 PsaV PsaVI
scf_12387_1102_contig_9	198	g	A	A	A	A	A	A	A	A	A	g	346 7285 7286 7287 K2 KW41 PA459 PsaV PsaVI
scf_12387_1102_contig_9	2266	a	G	G	G	G	G	G	G	G	G	a	346 7285 7286 7287 K2 KW41 PA459 PsaV PsaVI
scf_12387_1102_contig_9	2395	a	G	G	G	G	G	G	G	G	G	a	346 7285 7286 7287 K2 KW41 PA459 PsaV PsaVI
scf_12387_1102_contig_9	2398	g	T	T	T	T	T	T	T	T	T	g	346 7285 7286 7287 K2 KW41 PA459 PsaV PsaVI
scf_12387_1102_contig_9	243	c	T	T	T	T	T	T	T	T	T	c	346 7285 7286 7287 K2 KW41 PA459 PsaV PsaVI
scf_12387_1102_contig_9	351	g	T	T	T	T	T	T	T	T	T	g	346 7285 7286 7287 K2 KW41 PA459 PsaV PsaVI
scf_12387_1102_contig_9	399	t	C	C	C	C	C	C	C	C	C	t	346 7285 7286 7287 K2 KW41 PA459 PsaV PsaVI
scf_12387_1102_contig_9	404	c	T	T	T	T	T	T	T	T	T	c	346 7285 7286 7287 K2 KW41 PA459 PsaV PsaVI
scf_12387_1102_contig_9	516	c	T	T	T	T	T	T	T	T	T	c	346 7285 7286 7287 K2 KW41 PA459 PsaV PsaVI
scf_12387_1102_contig_9	579	t	C	C	C	C	C	C	C	C	C	t	346 7285 7286 7287 K2 KW41 PA459 PsaV PsaVI
scf_12387_1102_contig_9	663	g	A	A	A	A	A	A	A	A	A	g	346 7285 7286 7287 K2 KW41 PA459 PsaV PsaVI
scf_12387_1102_contig_9	71	g	C	C	C	C	C	C	C	C	C	g	346 7285 7286 7287 K2 KW41 PA459 PsaV PsaVI
scf_12387_112_contig_1	1313	c	A	A	A	A	A	A	A	A	A	c	346 7285 7286 7287 K2 KW41 PA459 PsaV PsaVI
scf_12387_112_contig_1	1507	c	T	T	T	T	T	T	T	T	T	c	346 7285 7286 7287 K2 KW41 PA459 PsaV PsaVI
scf_12387_112_contig_1	1551	c	G	G	G	G	G	G	G	G	G	c	346 7285 7286 7287 K2 KW41 PA459 PsaV PsaVI
scf_12387_112_contig_1	1557	c	G	G	G	G	G	G	G	G	G	c	346 7285 7286 7287 K2 KW41 PA459 PsaV PsaVI
scf_12387_112_contig_1	1621	g	T	T	T	T	T	T	T	T	T	g	346 7285 7286 7287 K2 KW41 PA459 PsaV PsaVI
scf_12387_112_contig_1	1688	g	T	T	T	T	T	T	T	T	T	g	346 7285 7286 7287 K2 KW41 PA459 PsaV PsaVI
scf_12387_112_contig_1	1725	t	A	A	A	A	A	A	A	A	A	t	346 7285 7286 7287 K2 KW41 PA459 PsaV PsaVI
scf_12387_112_contig_1	1990	g	A	A	A	A	A	A	A	A	A	g	346 7285 7286 7287 K2 KW41 PA459 PsaV PsaVI
scf_12387_112_contig_1	2083	g	A	A	A	A	A	A	A	A	A	g	346 7285 7286 7287 K2 KW41 PA459 PsaV PsaVI
scf_12387_112_contig_1	2155	g	A	A	A	A	A	A	A	A	A	g	346 7285 7286 7287 K2 KW41 PA459 PsaV PsaVI
scf_12387_112_contig_1	2269	g	A	A	A	A	A	A	A	A	A	g	346 7285 7286 7287 K2 KW41 PA459 PsaV PsaVI
scf_12387_112_contig_1	2371	a	G	G	G	G	G	G	G	G	G	a	346 7285 7286 7287 K2 KW41 PA459 PsaV PsaVI
scf_12387_112_contig_1	2443	t	C	C	C	C	C	C	C	C	C	t	346 7285 7286 7287 K2 KW41 PA459 PsaV PsaVI
scf_12387_112_contig_1	2518	t	C	C	C	C	C	C	C	C	C	t	346 7285 7286 7287 K2 KW41 PA459 PsaV PsaVI
scf_12387_112_contig_1	2581	g	A	A	A	A	A	A	A	A	A	g	346 7285 7286 7287 K2 KW41 PA459 PsaV PsaVI
scf_12387_112_contig_1	2605	a	G	G	G	G	G	G	G	G	G	a	346 7285 7286 7287 K2 KW41 PA459 PsaV PsaVI
scf_12387_112_contig_1	2805	c	T	T	T	T	T	T	T	T	T	c	346 7285 7286 7287 K2 KW41 PA459 PsaV PsaVI
scf_12387_112_contig_1	2872	t	C	C	C	C	C	C	C	C	C	t	346 7285 7286 7287 K2 KW41 PA459 PsaV PsaVI
scf_12387_112_contig_1	3039	g	A	A	A	A	A	A	A	A	A	g	346 7285 7286 7287 K2 KW41 PA459 PsaV PsaVI
scf_12387_112_contig_1	3135	g	A	A	A	A	A	A	A	A	A	g	346 7285 7286 7287 K2 KW41 PA459 PsaV PsaVI
scf_12387_112_contig_1	3217	a	G	G	G	G	G	G	G	G	G	a	346 7285 7286 7287 K2 KW41 PA459 PsaV PsaVI
scf_12387_112_contig_1	638	c	G	G	G	G	G	G	G	G	G	c	346 7285 7286 7287 K2 KW41 PA459 PsaV PsaVI
scf_12387_112_contig_3	1000	a	G	G	G	G	G	G	G	G	G	a	346 7285 7286 7287 K2 KW41 PA459 PsaV PsaVI
scf_12387_112_contig_3	1328	a	G	G	G	G	G	G	G	G	G	a	346 7285 7286 7287 K2 KW41 PA459 PsaV PsaVI
scf_12387_112_contig_3	153	t	A	A	A	A	A	A	A	A	A	t	346 7285 7286 7287 K2 KW41 PA459 PsaV PsaVI
scf_12387_112_contig_3	229	c	A	A	A	A	A	A	A	A	A	c	346 7285 7286 7287 K2 KW41 PA459 PsaV PsaVI
scf_12387_112_contig_3	2461	g	A	A	A	A	A	A	A	A	A	g	346 7285 7286 7287 K2 KW41 PA459 PsaV PsaVI
scf_12387_112_contig_3	412	c	A	A	A	A	A	A	A	A	A	c	346 7285 7286 7287 K2 KW41 PA459 PsaV PsaVI
scf_12387_112_contig_3	502	c	T	T	T	T	T	T	T	T	T	c	346 7285 7286 7287 K2 KW41 PA459 PsaV PsaVI
scf_12387_112_contig_3	520	a	G	G	G	G	G	G	G	G	G	a	346 7285 7286 7287 K2 KW41 PA459 PsaV PsaVI
scf_12387_112_contig_3	544	a	G	G	G	G	G	G	G	G	G	a	346 7285 7286 7287 K2 KW41 PA459 PsaV PsaVI
scf_12387_112_contig_3	752	a	G	G	G	G	G	G	G	G	G	a	346 7285 7286 7287 K2 KW41 PA459 PsaV PsaVI
scf_12387_112_contig_3	840	c	T	T	T	T	T	T	T	T	T	c	346 7285 7286 7287 K2 KW41 PA459 PsaV PsaVI
scf_12387_112_contig_3	985	g	T	T	T	T	T	T	T	T	T	g	346 7285 7286 7287 K2 KW41 PA459 PsaV PsaVI
scf_12387_113_contig_3	265	g	T	T	T	T	T	T	T	T	T	g	346 7285 7286 7287 K2 KW41 PA459 PsaV PsaVI
scf_12387_114_contig_1	166	a	G	G	G	G	G	G	G	G	G	a	346 7285 7286 7287 K2 KW41 PA459 PsaV PsaVI
scf_12387_114_contig_1	1801	a	G	G	G	G	G	G	G	G	G	a	346 7285 7286 7287 K2 KW41 PA459 PsaV PsaVI
scf_12387_114_contig_1	2297	t	G	G	G	G	G	G	G	G	G	t	346 7285 7286 7287 K2 KW41 PA459 PsaV PsaVI
scf_12387_114_contig_1	2345	t	C	C	C	C	C	C	C	C	C	t	346 7285 7286 7287 K2 KW41 PA459 PsaV PsaVI
scf_12387_114_contig_1	2563	g	T	T	T	T	T	T	T	T	T	g	346 7285 7286 7287 K2 KW41 PA459 PsaV PsaVI
scf_12387_114_contig_1	2596	c	T	T	T	T	T	T	T	T	T	c	346 7285 7286 7287 K2 KW41 PA459 PsaV PsaVI
scf_12387_114_contig_1	2634	g	A	A	A	A	A	A	A	A	A	g	346 7285 7286 7287 K2 KW41 PA459 PsaV PsaVI
scf_12387_114_contig_1	2770	a	G	G	G	G	G	G	G	G	G	a	346 7285 7286 7287 K2 KW41 PA459 PsaV PsaVI
scf_12387_114_contig_1	291	a	G	G	G	G	G	G	G	G	G	a	346 7285 7286 7287 K2 KW41 PA459 PsaV PsaVI
scf_12387_114_contig_1	3568	a	G	G	G	G	G	G	G	G	G	a	346 7285 7286 7287 K2 KW41 PA459 PsaV PsaVI
scf_12387_114_contig_1	3991	c	T	T	T	T	T	T	T	T	T	c	346 7285 7286 7287 K2 KW41 PA459 PsaV PsaVI
scf_12387_114_contig_1	4003	g	A	A	A	A	A	A	A	A	A	g	346 7285 7286 7287 K2 KW41 PA459 PsaV PsaVI
scf_12387_114_contig_1	4165	c	G	G	G	G	G	G	G	G	G	c	346 7285 7286 7287 K2 KW41 PA459 PsaV PsaVI
scf_12387_114_contig_1	689	t	C	C	C	C	C	C	C	C	C	t	346 7285 7286 7287 K2 KW41 PA459 PsaV PsaVI
scf_12387_114_contig_1	761	t	C	C	C	C	C	C	C	C	C	t	346 7285 7286 7287 K2 KW41 PA459 PsaV PsaVI
scf_12387_114_contig_1	881	c	T	T	T	T	T	T	T	T	T	c	346 7285 7286 7287 K2 KW41 PA459 PsaV PsaVI
scf_12387_114_contig_3	1448	c	A	A	A	A	A	A	A	A	A	c	346 7285 7286 7287 K2 KW41 PA459 PsaV PsaVI
scf_12387_114_contig_3	172	c	T	T	T	T	T	T	T	T	T	c	346 7285 7286 7287 K2 KW41 PA459 PsaV PsaVI
scf_12387_114_contig_3	2290	g	A	A	A	A	A	A	A	A	A	g	346 7285 7286 7287 K2 KW41 PA459 PsaV PsaVI
scf_12387_114_contig_3	235	g	A	A	A	A	A	A	A	A	A	g	346 7285 7286 7287 K2 KW41 PA459 PsaV PsaVI
scf_12387_114_contig_3	250	g	A	A	A	A	A	A	A	A	A	g	346 7285 7286 7287 K2 KW41 PA459 PsaV PsaVI
scf_12387_114_contig_3	298	a	G	G	G	G	G	G	G	G	G	a	346 7285 7286 7287 K2 KW41 PA459 PsaV PsaVI
scf_12387_114_contig_3	3627	g	A	A	A	A	A	A	A	A	A	g	346 7285 7286 7287 K2 KW41 PA459 PsaV PsaVI
scf_12387_114_contig_3	367	t	C	C	C	C	C	C	C	C	C	t	346 7285 7286 7287 K2 KW41 PA459 PsaV PsaVI
scf_12387_114_contig_3	4228	g	T	T	T	T	T	T	T	T	T	g	346 7285 7286 7287 K2 KW41 PA459 PsaV PsaVI
scf_12387_114_contig_3	5616	g	T	T	T	T	T	T	T	T	T	g	346 7285 7286 7287 K2 KW41 PA459 PsaV PsaVI
scf_12387_114_contig_3	5688	t	C	C	C	C	C	C	C	C	C	t	346 7285 7286 7287 K2 KW41 PA459 PsaV PsaVI
scf_12387_114_contig_3	5835	a	G	G	G	G	G	G	G	G	G	a	346 7285 7286 7287 K2 KW41 PA459 PsaV PsaVI
scf_12387_114_contig_3	5853	c	T	T	T	T	T	T	T	T	T	c	346 7285 7286 7287 K2 KW41 PA459 PsaV PsaVI
scf_12387_114_contig_3	5946	c	T	T	T	T	T	T	T	T	T	c	346 7285 7286 7287 K2 KW41 PA459 PsaV PsaVI
scf_12387_114_contig_3	6114	g	A	A	A	A	A	A	A	A	A	g	346 7285 7286 7287 K2 KW41 PA459 PsaV PsaVI
scf_12387_114_contig_3	6378	g	C	C	C	C	C	C	C	C	C	g	346 7285 7286 7287 K2 KW41 PA459 PsaV PsaVI
scf_12387_114_contig_3	7824	c	T	T	T	T	T	T	T	T	T	c	346 7285 7286 7287 K2 KW41 PA459 PsaV PsaVI
scf_12387_114_contig_3	8021	g	A	A	A	A	A	A	A	A	A	g	346 7285 7286 7287 K2 KW41 PA459 PsaV PsaVI
scf_12387_114_contig_3	8276	g	A	A	A	A	A	A	A	A	A	g	346 7285 7286 7287 K2 KW41 PA459 PsaV PsaVI
scf_12387_114_contig_3	8285	c	T	T	T	T	T	T	T	T	T	c	346 7285 7286 7287 K2 KW41 PA459 PsaV PsaVI
scf_12387_114_contig_3	8411	a	G	G	G	G	G	G	G	G	G	a	346 7285 7286 7287 K2 KW41 PA459 PsaV PsaVI
scf_12387_114_contig_3	8429	c	T	T	T	T	T	T	T	T	T	c	346 7285 7286 7287 K2 KW41 PA459 PsaV PsaVI
scf_12387_114_contig_3	8435	g	C	C	C	C	C	C	C	C	C	g	346 7285 7286 7287 K2 KW41 PA459 PsaV PsaVI
scf_12387_114_contig_3	8480	c	T	T	T	T	T	T	T	T	T	c	346 7285 7286 7287 K2 KW41 PA459 PsaV PsaVI
scf_12387_114_contig_3	8800	a	G	G	G	G	G	G	G	G	G	a	346 7285 7286 7287 K2 KW41 PA459 PsaV PsaVI
scf_12387_114_contig_3	8819	a	G	G	G	G	G	G	G	G	G	a	346 7285 7286 7287 K2 KW41 PA459 PsaV PsaVI
scf_12387_114_contig_3	882	c	T	T	T	T	T	T	T	T	T	c	346 7285 7286 7287 K2 KW41 PA459 PsaV PsaVI
scf_12387_114_contig_3	8828	g	A	A	A	A	A	A	A	A	A	g	346 7285 7286 7287 K2 KW41 PA459 PsaV PsaVI
scf_12387_114_contig_3	8924	c	A	A	A	A	A	A	A	A	A	c	346 7285 7286 7287 K2 KW41 PA459 PsaV PsaVI
scf_12387_11_contig_1	1010	g	A	A	A	A	A	A	A	A	A	g	346 7285 7286 7287 K2 KW41 PA459 PsaV PsaVI
scf_12387_11_contig_1	1025	c	T	T	T	T	T	T	T	T	T	c	346 7285 7286 7287 K2 KW41 PA459 PsaV PsaVI
scf_12387_11_contig_1	1028	c	G	G	G	G	G	G	G	G	G	c	346 7285 7286 7287 K2 KW41 PA459 PsaV PsaVI
scf_12387_11_contig_1	1049	g	A	A	A	A	A	A	A	A	A	g	346 7285 7286 7287 K2 KW41 PA459 PsaV PsaVI
scf_12387_11_contig_1	1112	t	C	C	C	C	C	C	C	C	C	t	346 7285 7286 7287 K2 KW41 PA459 PsaV PsaVI
scf_12387_11_contig_1	1131	g	T	T	T	T	T	T	T	T	T	g	346 7285 7286 7287 K2 KW41 PA459 PsaV PsaVI
scf_12387_11_contig_1	1217	g	C	C	C	C	C	C	C	C	C	g	346 7285 7286 7287 K2 KW41 PA459 PsaV PsaVI
scf_12387_11_contig_1	1235	c	T	T	T	T	T	T	T	T	T	c	346 7285 7286 7287 K2 KW41 PA459 PsaV PsaVI
scf_12387_11_contig_1	1632	g	A	A	A	A	A	A	A	A	A	g	346 7285 7286 7287 K2 KW41 PA459 PsaV PsaVI
scf_12387_11_contig_1	1728	g	A	A	A	A	A	A	A	A	A	g	346 7285 7286 7287 K2 KW41 PA459 PsaV PsaVI
scf_12387_11_contig_1	1760	a	T	T	T	T	T	T	T	T	T	a	346 7285 7286 7287 K2 KW41 PA459 PsaV PsaVI
scf_12387_11_contig_1	1824	g	A	A	A	A	A	A	A	A	A	g	346 7285 7286 7287 K2 KW41 PA459 PsaV PsaVI
scf_12387_11_contig_1	1857	c	T	T	T	T	T	T	T	T	T	c	346 7285 7286 7287 K2 KW41 PA459 PsaV PsaVI
scf_12387_11_contig_1	1902	g	A	A	A	A	A	A	A	A	A	g	346 7285 7286 7287 K2 KW41 PA459 PsaV PsaVI
scf_12387_11_contig_1	2033	a	G	G	G	G	G	G	G	G	G	a	346 7285 7286 7287 K2 KW41 PA459 PsaV PsaVI
scf_12387_11_contig_1	2609	g	A	A	A	A	A	A	A	A	A	g	346 7285 7286 7287 K2 KW41 PA459 PsaV PsaVI
scf_12387_11_contig_1	2610	g	A	A	A	A	A	A	A	A	A	g	346 7285 7286 7287 K2 KW41 PA459 PsaV PsaVI
scf_12387_11_contig_1	282	g	A	A	A	A	A	A	A	A	A	g	346 7285 7286 7287 K2 KW41 PA459 PsaV PsaVI
scf_12387_11_contig_1	3053	t	C	C	C	C	C	C	C	C	C	t	346 7285 7286 7287 K2 KW41 PA459 PsaV PsaVI
scf_12387_11_contig_1	3464	c	G	G	G	G	G	G	G	G	G	c	346 7285 7286 7287 K2 KW41 PA459 PsaV PsaVI
scf_12387_11_contig_1	3575	g	A	A	A	A	A	A	A	A	A	g	346 7285 7286 7287 K2 KW41 PA459 PsaV PsaVI
scf_12387_11_contig_1	3576	t	C	C	C	C	C	C	C	C	C	t	346 7285 7286 7287 K2 KW41 PA459 PsaV PsaVI
scf_12387_11_contig_1	3597	g	C	C	C	C	C	C	C	C	C	g	346 7285 7286 7287 K2 KW41 PA459 PsaV PsaVI
scf_12387_11_contig_1	3690	g	A	A	A	A	A	A	A	A	A	g	346 7285 7286 7287 K2 KW41 PA459 PsaV PsaVI
scf_12387_11_contig_1	3860	g	A	A	A	A	A	A	A	A	A	g	346 7285 7286 7287 K2 KW41 PA459 PsaV PsaVI
scf_12387_11_contig_1	3979	t	C	C	C	C	C	C	C	C	C	t	346 7285 7286 7287 K2 KW41 PA459 PsaV PsaVI
scf_12387_11_contig_1	4791	t	G	G	G	G	G	G	G	G	G	t	346 7285 7286 7287 K2 KW41 PA459 PsaV PsaVI
scf_12387_11_contig_1	4839	a	G	G	G	G	G	G	G	G	G	a	346 7285 7286 7287 K2 KW41 PA459 PsaV PsaVI
scf_12387_11_contig_1	7156	c	T	T	T	T	T	T	T	T	T	c	346 7285 7286 7287 K2 KW41 PA459 PsaV PsaVI
scf_12387_11_contig_1	7423	c	A	A	A	A	A	A	A	A	A	c	346 7285 7286 7287 K2 KW41 PA459 PsaV PsaVI
scf_12387_11_contig_1	761	a	G	G	G	G	G	G	G	G	G	a	346 7285 7286 7287 K2 KW41 PA459 PsaV PsaVI
scf_12387_11_contig_1	7612	g	A	A	A	A	A	A	A	A	A	g	346 7285 7286 7287 K2 KW41 PA459 PsaV PsaVI
scf_12387_11_contig_1	7639	g	A	A	A	A	A	A	A	A	A	g	346 7285 7286 7287 K2 KW41 PA459 PsaV PsaVI
scf_12387_11_contig_1	7684	c	T	T	T	T	T	T	T	T	T	c	346 7285 7286 7287 K2 KW41 PA459 PsaV PsaVI
scf_12387_11_contig_1	7720	c	T	T	T	T	T	T	T	T	T	c	346 7285 7286 7287 K2 KW41 PA459 PsaV PsaVI
scf_12387_11_contig_1	7828	t	G	G	G	G	G	G	G	G	G	t	346 7285 7286 7287 K2 KW41 PA459 PsaV PsaVI
scf_12387_11_contig_1	7898	c	T	T	T	T	T	T	T	T	T	c	346 7285 7286 7287 K2 KW41 PA459 PsaV PsaVI
scf_12387_11_contig_1	7939	c	A	A	A	A	A	A	A	A	A	c	346 7285 7286 7287 K2 KW41 PA459 PsaV PsaVI
scf_12387_11_contig_1	800	g	T	T	T	T	T	T	T	T	T	g	346 7285 7286 7287 K2 KW41 PA459 PsaV PsaVI
scf_12387_11_contig_1	8302	c	T	T	T	T	T	T	T	T	T	c	346 7285 7286 7287 K2 KW41 PA459 PsaV PsaVI
scf_12387_11_contig_1	8407	t	C	C	C	C	C	C	C	C	C	t	346 7285 7286 7287 K2 KW41 PA459 PsaV PsaVI
scf_12387_11_contig_1	8425	c	T	T	T	T	T	T	T	T	T	c	346 7285 7286 7287 K2 KW41 PA459 PsaV PsaVI
scf_12387_11_contig_1	920	c	T	T	T	T	T	T	T	T	T	c	346 7285 7286 7287 K2 KW41 PA459 PsaV PsaVI
scf_12387_124_contig_1	1050	g	A	A	A	A	A	A	A	A	A	g	346 7285 7286 7287 K2 KW41 PA459 PsaV PsaVI
scf_12387_124_contig_1	1058	c	T	T	T	T	T	T	T	T	T	c	346 7285 7286 7287 K2 KW41 PA459 PsaV PsaVI
scf_12387_124_contig_1	1528	c	T	T	T	T	T	T	T	T	T	c	346 7285 7286 7287 K2 KW41 PA459 PsaV PsaVI
scf_12387_124_contig_1	1592	g	A	A	A	A	A	A	A	A	A	g	346 7285 7286 7287 K2 KW41 PA459 PsaV PsaVI
scf_12387_124_contig_1	1616	a	G	G	G	G	G	G	G	G	G	a	346 7285 7286 7287 K2 KW41 PA459 PsaV PsaVI
scf_12387_124_contig_1	1868	g	A	A	A	A	A	A	A	A	A	g	346 7285 7286 7287 K2 KW41 PA459 PsaV PsaVI
scf_12387_124_contig_1	411	g	A	A	A	A	A	A	A	A	A	g	346 7285 7286 7287 K2 KW41 PA459 PsaV PsaVI
scf_12387_124_contig_3	1778	a	G	G	G	G	G	G	G	G	G	a	346 7285 7286 7287 K2 KW41 PA459 PsaV PsaVI
scf_12387_124_contig_3	1998	a	G	G	G	G	G	G	G	G	G	a	346 7285 7286 7287 K2 KW41 PA459 PsaV PsaVI
scf_12387_124_contig_3	2026	t	A	A	A	A	A	A	A	A	A	t	346 7285 7286 7287 K2 KW41 PA459 PsaV PsaVI
scf_12387_124_contig_3	212	a	C	C	C	C	C	C	C	C	C	a	346 7285 7286 7287 K2 KW41 PA459 PsaV PsaVI
scf_12387_124_contig_3	2680	a	G	G	G	G	G	G	G	G	G	a	346 7285 7286 7287 K2 KW41 PA459 PsaV PsaVI
scf_12387_124_contig_3	2709	a	G	G	G	G	G	G	G	G	G	a	346 7285 7286 7287 K2 KW41 PA459 PsaV PsaVI
scf_12387_124_contig_3	2920	c	A	A	A	A	A	A	A	A	A	c	346 7285 7286 7287 K2 KW41 PA459 PsaV PsaVI
scf_12387_124_contig_3	3019	g	A	A	A	A	A	A	A	A	A	g	346 7285 7286 7287 K2 KW41 PA459 PsaV PsaVI
scf_12387_124_contig_3	3142	g	A	A	A	A	A	A	A	A	A	g	346 7285 7286 7287 K2 KW41 PA459 PsaV PsaVI
scf_12387_124_contig_3	3901	c	T	T	T	T	T	T	T	T	T	c	346 7285 7286 7287 K2 KW41 PA459 PsaV PsaVI
scf_12387_124_contig_3	4113	g	A	A	A	A	A	A	A	A	A	g	346 7285 7286 7287 K2 KW41 PA459 PsaV PsaVI
scf_12387_124_contig_3	4351	g	A	A	A	A	A	A	A	A	A	g	346 7285 7286 7287 K2 KW41 PA459 PsaV PsaVI
scf_12387_124_contig_3	4585	a	G	G	G	G	G	G	G	G	G	a	346 7285 7286 7287 K2 KW41 PA459 PsaV PsaVI
scf_12387_124_contig_3	514	c	T	T	T	T	T	T	T	T	T	c	346 7285 7286 7287 K2 KW41 PA459 PsaV PsaVI
scf_12387_124_contig_3	545	a	C	C	C	C	C	C	C	C	C	a	346 7285 7286 7287 K2 KW41 PA459 PsaV PsaVI
scf_12387_124_contig_3	5992	c	T	T	T	T	T	T	T	T	T	c	346 7285 7286 7287 K2 KW41 PA459 PsaV PsaVI
scf_12387_124_contig_3	607	g	C	C	C	C	C	C	C	C	C	g	346 7285 7286 7287 K2 KW41 PA459 PsaV PsaVI
scf_12387_124_contig_3	6761	a	G	G	G	G	G	G	G	G	G	a	346 7285 7286 7287 K2 KW41 PA459 PsaV PsaVI
scf_12387_124_contig_3	6833	a	G	G	G	G	G	G	G	G	G	a	346 7285 7286 7287 K2 KW41 PA459 PsaV PsaVI
scf_12387_124_contig_3	690	a	G	G	G	G	G	G	G	G	G	a	346 7285 7286 7287 K2 KW41 PA459 PsaV PsaVI
scf_12387_124_contig_3	6926	t	C	C	C	C	C	C	C	C	C	t	346 7285 7286 7287 K2 KW41 PA459 PsaV PsaVI
scf_12387_124_contig_3	6929	a	C	C	C	C	C	C	C	C	C	a	346 7285 7286 7287 K2 KW41 PA459 PsaV PsaVI
scf_12387_124_contig_3	706	t	A	A	A	A	A	A	A	A	A	t	346 7285 7286 7287 K2 KW41 PA459 PsaV PsaVI
scf_12387_124_contig_3	717	a	T	T	T	T	T	T	T	T	T	a	346 7285 7286 7287 K2 KW41 PA459 PsaV PsaVI
scf_12387_124_contig_3	926	a	G	G	G	G	G	G	G	G	G	a	346 7285 7286 7287 K2 KW41 PA459 PsaV PsaVI
scf_12387_128_contig_1	1014	a	G	G	G	G	G	G	G	G	G	a	346 7285 7286 7287 K2 KW41 PA459 PsaV PsaVI
scf_12387_128_contig_1	1176	t	C	C	C	C	C	C	C	C	C	t	346 7285 7286 7287 K2 KW41 PA459 PsaV PsaVI
scf_12387_128_contig_1	1471	t	C	C	C	C	C	C	C	C	C	t	346 7285 7286 7287 K2 KW41 PA459 PsaV PsaVI
scf_12387_128_contig_1	2378	a	G	G	G	G	G	G	G	G	G	a	346 7285 7286 7287 K2 KW41 PA459 PsaV PsaVI
scf_12387_128_contig_1	2423	a	T	T	T	T	T	T	T	T	T	a	346 7285 7286 7287 K2 KW41 PA459 PsaV PsaVI
scf_12387_128_contig_1	2489	c	A	A	A	A	A	A	A	A	A	c	346 7285 7286 7287 K2 KW41 PA459 PsaV PsaVI
scf_12387_128_contig_1	2597	g	A	A	A	A	A	A	A	A	A	g	346 7285 7286 7287 K2 KW41 PA459 PsaV PsaVI
scf_12387_128_contig_1	2804	t	C	C	C	C	C	C	C	C	C	t	346 7285 7286 7287 K2 KW41 PA459 PsaV PsaVI
scf_12387_128_contig_1	2834	t	C	C	C	C	C	C	C	C	C	t	346 7285 7286 7287 K2 KW41 PA459 PsaV PsaVI
scf_12387_128_contig_1	3000	t	C	C	C	C	C	C	C	C	C	t	346 7285 7286 7287 K2 KW41 PA459 PsaV PsaVI
scf_12387_128_contig_1	3017	c	T	T	T	T	T	T	T	T	T	c	346 7285 7286 7287 K2 KW41 PA459 PsaV PsaVI
scf_12387_128_contig_1	3326	c	G	G	G	G	G	G	G	G	G	c	346 7285 7286 7287 K2 KW41 PA459 PsaV PsaVI
scf_12387_128_contig_1	3358	g	T	T	T	T	T	T	T	T	T	g	346 7285 7286 7287 K2 KW41 PA459 PsaV PsaVI
scf_12387_128_contig_1	3671	c	A	A	A	A	A	A	A	A	A	c	346 7285 7286 7287 K2 KW41 PA459 PsaV PsaVI
scf_12387_128_contig_1	3680	g	A	A	A	A	A	A	A	A	A	g	346 7285 7286 7287 K2 KW41 PA459 PsaV PsaVI
scf_12387_128_contig_1	3707	c	T	T	T	T	T	T	T	T	T	c	346 7285 7286 7287 K2 KW41 PA459 PsaV PsaVI
scf_12387_128_contig_1	3838	a	C	C	C	C	C	C	C	C	C	a	346 7285 7286 7287 K2 KW41 PA459 PsaV PsaVI
scf_12387_128_contig_1	3890	t	G	G	G	G	G	G	G	G	G	t	346 7285 7286 7287 K2 KW41 PA459 PsaV PsaVI
scf_12387_128_contig_1	3911	g	A	A	A	A	A	A	A	A	A	g	346 7285 7286 7287 K2 KW41 PA459 PsaV PsaVI
scf_12387_128_contig_1	3952	g	A	A	A	A	A	A	A	A	A	g	346 7285 7286 7287 K2 KW41 PA459 PsaV PsaVI
scf_12387_128_contig_1	4075	t	C	C	C	C	C	C	C	C	C	t	346 7285 7286 7287 K2 KW41 PA459 PsaV PsaVI
scf_12387_128_contig_1	4111	g	T	T	T	T	T	T	T	T	T	g	346 7285 7286 7287 K2 KW41 PA459 PsaV PsaVI
scf_12387_128_contig_1	4129	a	T	T	T	T	T	T	T	T	T	a	346 7285 7286 7287 K2 KW41 PA459 PsaV PsaVI
scf_12387_128_contig_1	4243	g	A	A	A	A	A	A	A	A	A	g	346 7285 7286 7287 K2 KW41 PA459 PsaV PsaVI
scf_12387_128_contig_1	4345	t	C	C	C	C	C	C	C	C	C	t	346 7285 7286 7287 K2 KW41 PA459 PsaV PsaVI
scf_12387_128_contig_1	4417	g	A	A	A	A	A	A	A	A	A	g	346 7285 7286 7287 K2 KW41 PA459 PsaV PsaVI
scf_12387_128_contig_1	4479	c	G	G	G	G	G	G	G	G	G	c	346 7285 7286 7287 K2 KW41 PA459 PsaV PsaVI
scf_12387_128_contig_1	4735	c	A	A	A	A	A	A	A	A	A	c	346 7285 7286 7287 K2 KW41 PA459 PsaV PsaVI
scf_12387_128_contig_1	4954	a	C	C	C	C	C	C	C	C	C	a	346 7285 7286 7287 K2 KW41 PA459 PsaV PsaVI
scf_12387_128_contig_1	586	c	A	A	A	A	A	A	A	A	A	c	346 7285 7286 7287 K2 KW41 PA459 PsaV PsaVI
scf_12387_128_contig_1	6501	a	G	G	G	G	G	G	G	G	G	a	346 7285 7286 7287 K2 KW41 PA459 PsaV PsaVI
scf_12387_128_contig_1	6521	a	G	G	G	G	G	G	G	G	G	a	346 7285 7286 7287 K2 KW41 PA459 PsaV PsaVI
scf_12387_128_contig_1	7251	g	A	A	A	A	A	A	A	A	A	g	346 7285 7286 7287 K2 KW41 PA459 PsaV PsaVI
scf_12387_128_contig_1	7742	c	A	A	A	A	A	A	A	A	A	c	346 7285 7286 7287 K2 KW41 PA459 PsaV PsaVI
scf_12387_128_contig_1	7752	c	A	A	A	A	A	A	A	A	A	c	346 7285 7286 7287 K2 KW41 PA459 PsaV PsaVI
scf_12387_128_contig_1	7932	g	A	A	A	A	A	A	A	A	A	g	346 7285 7286 7287 K2 KW41 PA459 PsaV PsaVI
scf_12387_128_contig_3	2031	c	G	G	G	G	G	G	G	G	G	c	346 7285 7286 7287 K2 KW41 PA459 PsaV PsaVI
scf_12387_128_contig_3	2241	g	C	C	C	C	C	C	C	C	C	g	346 7285 7286 7287 K2 KW41 PA459 PsaV PsaVI
scf_12387_128_contig_3	2609	t	C	C	C	C	C	C	C	C	C	t	346 7285 7286 7287 K2 KW41 PA459 PsaV PsaVI
scf_12387_128_contig_3	2708	g	A	A	A	A	A	A	A	A	A	g	346 7285 7286 7287 K2 KW41 PA459 PsaV PsaVI
scf_12387_128_contig_3	2867	g	A	A	A	A	A	A	A	A	A	g	346 7285 7286 7287 K2 KW41 PA459 PsaV PsaVI
scf_12387_128_contig_3	2996	c	A	A	A	A	A	A	A	A	A	c	346 7285 7286 7287 K2 KW41 PA459 PsaV PsaVI
scf_12387_128_contig_3	3077	t	C	C	C	C	C	C	C	C	C	t	346 7285 7286 7287 K2 KW41 PA459 PsaV PsaVI
scf_12387_128_contig_3	3418	g	A	A	A	A	A	A	A	A	A	g	346 7285 7286 7287 K2 KW41 PA459 PsaV PsaVI
scf_12387_128_contig_3	427	g	C	C	C	C	C	C	C	C	C	g	346 7285 7286 7287 K2 KW41 PA459 PsaV PsaVI
scf_12387_128_contig_3	4596	g	A	A	A	A	A	A	A	A	A	g	346 7285 7286 7287 K2 KW41 PA459 PsaV PsaVI
scf_12387_128_contig_3	4713	c	T	T	T	T	T	T	T	T	T	c	346 7285 7286 7287 K2 KW41 PA459 PsaV PsaVI
scf_12387_128_contig_3	5463	c	T	T	T	T	T	T	T	T	T	c	346 7285 7286 7287 K2 KW41 PA459 PsaV PsaVI
scf_12387_128_contig_3	655	t	C	C	C	C	C	C	C	C	C	t	346 7285 7286 7287 K2 KW41 PA459 PsaV PsaVI
scf_12387_128_contig_5	10325	g	A	A	A	A	A	A	A	A	A	g	346 7285 7286 7287 K2 KW41 PA459 PsaV PsaVI
scf_12387_128_contig_5	10328	t	C	C	C	C	C	C	C	C	C	t	346 7285 7286 7287 K2 KW41 PA459 PsaV PsaVI
scf_12387_128_contig_5	1596	t	C	C	C	C	C	C	C	C	C	t	346 7285 7286 7287 K2 KW41 PA459 PsaV PsaVI
scf_12387_128_contig_5	1620	c	T	T	T	T	T	T	T	T	T	c	346 7285 7286 7287 K2 KW41 PA459 PsaV PsaVI
scf_12387_128_contig_5	1659	c	A	A	A	A	A	A	A	A	A	c	346 7285 7286 7287 K2 KW41 PA459 PsaV PsaVI
scf_12387_128_contig_5	1722	c	T	T	T	T	T	T	T	T	T	c	346 7285 7286 7287 K2 KW41 PA459 PsaV PsaVI
scf_12387_128_contig_5	2295	c	T	T	T	T	T	T	T	T	T	c	346 7285 7286 7287 K2 KW41 PA459 PsaV PsaVI
scf_12387_128_contig_5	2655	t	C	C	C	C	C	C	C	C	C	t	346 7285 7286 7287 K2 KW41 PA459 PsaV PsaVI
scf_12387_128_contig_5	2667	g	A	A	A	A	A	A	A	A	A	g	346 7285 7286 7287 K2 KW41 PA459 PsaV PsaVI
scf_12387_128_contig_5	3018	t	C	C	C	C	C	C	C	C	C	t	346 7285 7286 7287 K2 KW41 PA459 PsaV PsaVI
scf_12387_128_contig_5	3267	a	C	C	C	C	C	C	C	C	C	a	346 7285 7286 7287 K2 KW41 PA459 PsaV PsaVI
scf_12387_128_contig_5	355	t	C	C	C	C	C	C	C	C	C	t	346 7285 7286 7287 K2 KW41 PA459 PsaV PsaVI
scf_12387_128_contig_5	365	c	A	A	A	A	A	A	A	A	A	c	346 7285 7286 7287 K2 KW41 PA459 PsaV PsaVI
scf_12387_128_contig_5	4545	t	C	C	C	C	C	C	C	C	C	t	346 7285 7286 7287 K2 KW41 PA459 PsaV PsaVI
scf_12387_128_contig_5	4626	a	G	G	G	G	G	G	G	G	G	a	346 7285 7286 7287 K2 KW41 PA459 PsaV PsaVI
scf_12387_128_contig_5	4791	g	A	A	A	A	A	A	A	A	A	g	346 7285 7286 7287 K2 KW41 PA459 PsaV PsaVI
scf_12387_128_contig_5	4839	g	A	A	A	A	A	A	A	A	A	g	346 7285 7286 7287 K2 KW41 PA459 PsaV PsaVI
scf_12387_128_contig_5	499	g	C	C	C	C	C	C	C	C	C	g	346 7285 7286 7287 K2 KW41 PA459 PsaV PsaVI
scf_12387_128_contig_5	5029	c	G	G	G	G	G	G	G	G	G	c	346 7285 7286 7287 K2 KW41 PA459 PsaV PsaVI
scf_12387_128_contig_5	51	c	G	G	G	G	G	G	G	G	G	c	346 7285 7286 7287 K2 KW41 PA459 PsaV PsaVI
scf_12387_128_contig_5	5307	t	G	G	G	G	G	G	G	G	G	t	346 7285 7286 7287 K2 KW41 PA459 PsaV PsaVI
scf_12387_128_contig_5	577	c	T	T	T	T	T	T	T	T	T	c	346 7285 7286 7287 K2 KW41 PA459 PsaV PsaVI
scf_12387_128_contig_5	6063	g	A	A	A	A	A	A	A	A	A	g	346 7285 7286 7287 K2 KW41 PA459 PsaV PsaVI
scf_12387_128_contig_5	6129	c	T	T	T	T	T	T	T	T	T	c	346 7285 7286 7287 K2 KW41 PA459 PsaV PsaVI
scf_12387_128_contig_5	6406	c	T	T	T	T	T	T	T	T	T	c	346 7285 7286 7287 K2 KW41 PA459 PsaV PsaVI
scf_12387_128_contig_5	6783	c	T	T	T	T	T	T	T	T	T	c	346 7285 7286 7287 K2 KW41 PA459 PsaV PsaVI
scf_12387_128_contig_5	7139	a	G	G	G	G	G	G	G	G	G	a	346 7285 7286 7287 K2 KW41 PA459 PsaV PsaVI
scf_12387_128_contig_5	7212	c	G	G	G	G	G	G	G	G	G	c	346 7285 7286 7287 K2 KW41 PA459 PsaV PsaVI
scf_12387_128_contig_5	7515	g	A	A	A	A	A	A	A	A	A	g	346 7285 7286 7287 K2 KW41 PA459 PsaV PsaVI
scf_12387_128_contig_5	7782	a	G	G	G	G	G	G	G	G	G	a	346 7285 7286 7287 K2 KW41 PA459 PsaV PsaVI
scf_12387_128_contig_5	7898	a	G	G	G	G	G	G	G	G	G	a	346 7285 7286 7287 K2 KW41 PA459 PsaV PsaVI
scf_12387_128_contig_5	8424	t	G	G	G	G	G	G	G	G	G	t	346 7285 7286 7287 K2 KW41 PA459 PsaV PsaVI
scf_12387_128_contig_5	9560	g	A	A	A	A	A	A	A	A	A	g	346 7285 7286 7287 K2 KW41 PA459 PsaV PsaVI
scf_12387_128_contig_5	9619	a	G	G	G	G	G	G	G	G	G	a	346 7285 7286 7287 K2 KW41 PA459 PsaV PsaVI
scf_12387_128_contig_5	9697	a	G	G	G	G	G	G	G	G	G	a	346 7285 7286 7287 K2 KW41 PA459 PsaV PsaVI
scf_12387_128_contig_5	9760	c	A	A	A	A	A	A	A	A	A	c	346 7285 7286 7287 K2 KW41 PA459 PsaV PsaVI
scf_12387_128_contig_7	4336	t	C	C	C	C	C	C	C	C	C	t	346 7285 7286 7287 K2 KW41 PA459 PsaV PsaVI
scf_12387_128_contig_7	4882	a	G	G	G	G	G	G	G	G	G	a	346 7285 7286 7287 K2 KW41 PA459 PsaV PsaVI
scf_12387_128_contig_9	10048	t	C	C	C	C	C	C	C	C	C	t	346 7285 7286 7287 K2 KW41 PA459 PsaV PsaVI
scf_12387_128_contig_9	10285	c	T	T	T	T	T	T	T	T	T	c	346 7285 7286 7287 K2 KW41 PA459 PsaV PsaVI
scf_12387_128_contig_9	10429	c	T	T	T	T	T	T	T	T	T	c	346 7285 7286 7287 K2 KW41 PA459 PsaV PsaVI
scf_12387_128_contig_9	10444	t	A	A	A	A	A	A	A	A	A	t	346 7285 7286 7287 K2 KW41 PA459 PsaV PsaVI
scf_12387_128_contig_9	10741	a	G	G	G	G	G	G	G	G	G	a	346 7285 7286 7287 K2 KW41 PA459 PsaV PsaVI
scf_12387_128_contig_9	11036	t	G	G	G	G	G	G	G	G	G	t	346 7285 7286 7287 K2 KW41 PA459 PsaV PsaVI
scf_12387_128_contig_9	11102	t	A	A	A	A	A	A	A	A	A	t	346 7285 7286 7287 K2 KW41 PA459 PsaV PsaVI
scf_12387_128_contig_9	11111	g	C	C	C	C	C	C	C	C	C	g	346 7285 7286 7287 K2 KW41 PA459 PsaV PsaVI
scf_12387_128_contig_9	11171	g	A	A	A	A	A	A	A	A	A	g	346 7285 7286 7287 K2 KW41 PA459 PsaV PsaVI
scf_12387_128_contig_9	11510	a	G	G	G	G	G	G	G	G	G	a	346 7285 7286 7287 K2 KW41 PA459 PsaV PsaVI
scf_12387_128_contig_9	11932	g	A	A	A	A	A	A	A	A	A	g	346 7285 7286 7287 K2 KW41 PA459 PsaV PsaVI
scf_12387_128_contig_9	12341	g	A	A	A	A	A	A	A	A	A	g	346 7285 7286 7287 K2 KW41 PA459 PsaV PsaVI
scf_12387_128_contig_9	12528	g	A	A	A	A	A	A	A	A	A	g	346 7285 7286 7287 K2 KW41 PA459 PsaV PsaVI
scf_12387_128_contig_9	12673	t	G	G	G	G	G	G	G	G	G	t	346 7285 7286 7287 K2 KW41 PA459 PsaV PsaVI
scf_12387_128_contig_9	12679	c	T	T	T	T	T	T	T	T	T	c	346 7285 7286 7287 K2 KW41 PA459 PsaV PsaVI
scf_12387_128_contig_9	12739	g	A	A	A	A	A	A	A	A	A	g	346 7285 7286 7287 K2 KW41 PA459 PsaV PsaVI
scf_12387_128_contig_9	12751	g	T	T	T	T	T	T	T	T	T	g	346 7285 7286 7287 K2 KW41 PA459 PsaV PsaVI
scf_12387_128_contig_9	12769	c	T	T	T	T	T	T	T	T	T	c	346 7285 7286 7287 K2 KW41 PA459 PsaV PsaVI
scf_12387_128_contig_9	13285	c	T	T	T	T	T	T	T	T	T	c	346 7285 7286 7287 K2 KW41 PA459 PsaV PsaVI
scf_12387_128_contig_9	13294	c	T	T	T	T	T	T	T	T	T	c	346 7285 7286 7287 K2 KW41 PA459 PsaV PsaVI
scf_12387_128_contig_9	13420	t	G	G	G	G	G	G	G	G	G	t	346 7285 7286 7287 K2 KW41 PA459 PsaV PsaVI
scf_12387_128_contig_9	13918	g	A	A	A	A	A	A	A	A	A	g	346 7285 7286 7287 K2 KW41 PA459 PsaV PsaVI
scf_12387_128_contig_9	13936	g	T	T	T	T	T	T	T	T	T	g	346 7285 7286 7287 K2 KW41 PA459 PsaV PsaVI
scf_12387_128_contig_9	13963	t	C	C	C	C	C	C	C	C	C	t	346 7285 7286 7287 K2 KW41 PA459 PsaV PsaVI
scf_12387_128_contig_9	14479	c	G	G	G	G	G	G	G	G	G	c	346 7285 7286 7287 K2 KW41 PA459 PsaV PsaVI
scf_12387_128_contig_9	15249	t	C	C	C	C	C	C	C	C	C	t	346 7285 7286 7287 K2 KW41 PA459 PsaV PsaVI
scf_12387_128_contig_9	1925	a	G	G	G	G	G	G	G	G	G	a	346 7285 7286 7287 K2 KW41 PA459 PsaV PsaVI
scf_12387_128_contig_9	2673	g	A	A	A	A	A	A	A	A	A	g	346 7285 7286 7287 K2 KW41 PA459 PsaV PsaVI
scf_12387_128_contig_9	3025	t	C	C	C	C	C	C	C	C	C	t	346 7285 7286 7287 K2 KW41 PA459 PsaV PsaVI
scf_12387_128_contig_9	3076	c	T	T	T	T	T	T	T	T	T	c	346 7285 7286 7287 K2 KW41 PA459 PsaV PsaVI
scf_12387_128_contig_9	4989	t	G	G	G	G	G	G	G	G	G	t	346 7285 7286 7287 K2 KW41 PA459 PsaV PsaVI
scf_12387_128_contig_9	5032	t	G	G	G	G	G	G	G	G	G	t	346 7285 7286 7287 K2 KW41 PA459 PsaV PsaVI
scf_12387_128_contig_9	5158	c	G	G	G	G	G	G	G	G	G	c	346 7285 7286 7287 K2 KW41 PA459 PsaV PsaVI
scf_12387_128_contig_9	5428	c	A	A	A	A	A	A	A	A	A	c	346 7285 7286 7287 K2 KW41 PA459 PsaV PsaVI
scf_12387_128_contig_9	5630	a	G	G	G	G	G	G	G	G	G	a	346 7285 7286 7287 K2 KW41 PA459 PsaV PsaVI
scf_12387_128_contig_9	5999	a	G	G	G	G	G	G	G	G	G	a	346 7285 7286 7287 K2 KW41 PA459 PsaV PsaVI
scf_12387_128_contig_9	7096	g	A	A	A	A	A	A	A	A	A	g	346 7285 7286 7287 K2 KW41 PA459 PsaV PsaVI
scf_12387_128_contig_9	7105	a	G	G	G	G	G	G	G	G	G	a	346 7285 7286 7287 K2 KW41 PA459 PsaV PsaVI
scf_12387_128_contig_9	7135	c	T	T	T	T	T	T	T	T	T	c	346 7285 7286 7287 K2 KW41 PA459 PsaV PsaVI
scf_12387_128_contig_9	8031	c	T	T	T	T	T	T	T	T	T	c	346 7285 7286 7287 K2 KW41 PA459 PsaV PsaVI
scf_12387_128_contig_9	8142	a	G	G	G	G	G	G	G	G	G	a	346 7285 7286 7287 K2 KW41 PA459 PsaV PsaVI
scf_12387_128_contig_9	8294	g	A	A	A	A	A	A	A	A	A	g	346 7285 7286 7287 K2 KW41 PA459 PsaV PsaVI
scf_12387_128_contig_9	8349	g	T	T	T	T	T	T	T	T	T	g	346 7285 7286 7287 K2 KW41 PA459 PsaV PsaVI
scf_12387_128_contig_9	8430	a	C	C	C	C	C	C	C	C	C	a	346 7285 7286 7287 K2 KW41 PA459 PsaV PsaVI
scf_12387_128_contig_9	8496	a	G	G	G	G	G	G	G	G	G	a	346 7285 7286 7287 K2 KW41 PA459 PsaV PsaVI
scf_12387_128_contig_9	8535	g	A	A	A	A	A	A	A	A	A	g	346 7285 7286 7287 K2 KW41 PA459 PsaV PsaVI
scf_12387_128_contig_9	8672	g	A	A	A	A	A	A	A	A	A	g	346 7285 7286 7287 K2 KW41 PA459 PsaV PsaVI
scf_12387_128_contig_9	8731	a	G	G	G	G	G	G	G	G	G	a	346 7285 7286 7287 K2 KW41 PA459 PsaV PsaVI
scf_12387_128_contig_9	8735	g	A	A	A	A	A	A	A	A	A	g	346 7285 7286 7287 K2 KW41 PA459 PsaV PsaVI
scf_12387_128_contig_9	8741	c	T	T	T	T	T	T	T	T	T	c	346 7285 7286 7287 K2 KW41 PA459 PsaV PsaVI
scf_12387_128_contig_9	8882	g	A	A	A	A	A	A	A	A	A	g	346 7285 7286 7287 K2 KW41 PA459 PsaV PsaVI
scf_12387_128_contig_9	9386	c	T	T	T	T	T	T	T	T	T	c	346 7285 7286 7287 K2 KW41 PA459 PsaV PsaVI
scf_12387_128_contig_9	9413	c	T	T	T	T	T	T	T	T	T	c	346 7285 7286 7287 K2 KW41 PA459 PsaV PsaVI
scf_12387_128_contig_9	9575	c	T	T	T	T	T	T	T	T	T	c	346 7285 7286 7287 K2 KW41 PA459 PsaV PsaVI
scf_12387_128_contig_9	9625	c	T	T	T	T	T	T	T	T	T	c	346 7285 7286 7287 K2 KW41 PA459 PsaV PsaVI
scf_12387_128_contig_9	9677	g	A	A	A	A	A	A	A	A	A	g	346 7285 7286 7287 K2 KW41 PA459 PsaV PsaVI
scf_12387_135_contig_11	10458	g	A	A	A	A	A	A	A	A	A	g	346 7285 7286 7287 K2 KW41 PA459 PsaV PsaVI
scf_12387_135_contig_11	10471	g	T	T	T	T	T	T	T	T	T	g	346 7285 7286 7287 K2 KW41 PA459 PsaV PsaVI
scf_12387_135_contig_11	10715	a	G	G	G	G	G	G	G	G	G	a	346 7285 7286 7287 K2 KW41 PA459 PsaV PsaVI
scf_12387_135_contig_11	10736	g	A	A	A	A	A	A	A	A	A	g	346 7285 7286 7287 K2 KW41 PA459 PsaV PsaVI
scf_12387_135_contig_11	10758	c	T	T	T	T	T	T	T	T	T	c	346 7285 7286 7287 K2 KW41 PA459 PsaV PsaVI
scf_12387_135_contig_11	10848	c	T	T	T	T	T	T	T	T	T	c	346 7285 7286 7287 K2 KW41 PA459 PsaV PsaVI
scf_12387_135_contig_11	11831	c	G	G	G	G	G	G	G	G	G	c	346 7285 7286 7287 K2 KW41 PA459 PsaV PsaVI
scf_12387_135_contig_11	12310	t	C	C	C	C	C	C	C	C	C	t	346 7285 7286 7287 K2 KW41 PA459 PsaV PsaVI
scf_12387_135_contig_11	12364	c	T	T	T	T	T	T	T	T	T	c	346 7285 7286 7287 K2 KW41 PA459 PsaV PsaVI
scf_12387_135_contig_11	12748	t	C	C	C	C	C	C	C	C	C	t	346 7285 7286 7287 K2 KW41 PA459 PsaV PsaVI
scf_12387_135_contig_11	12784	t	C	C	C	C	C	C	C	C	C	t	346 7285 7286 7287 K2 KW41 PA459 PsaV PsaVI
scf_12387_135_contig_11	12823	g	A	A	A	A	A	A	A	A	A	g	346 7285 7286 7287 K2 KW41 PA459 PsaV PsaVI
scf_12387_135_contig_11	12835	c	A	A	A	A	A	A	A	A	A	c	346 7285 7286 7287 K2 KW41 PA459 PsaV PsaVI
scf_12387_135_contig_11	12856	g	A	A	A	A	A	A	A	A	A	g	346 7285 7286 7287 K2 KW41 PA459 PsaV PsaVI
scf_12387_135_contig_11	12868	a	G	G	G	G	G	G	G	G	G	a	346 7285 7286 7287 K2 KW41 PA459 PsaV PsaVI
scf_12387_135_contig_11	12877	g	A	A	A	A	A	A	A	A	A	g	346 7285 7286 7287 K2 KW41 PA459 PsaV PsaVI
scf_12387_135_contig_11	13392	g	A	A	A	A	A	A	A	A	A	g	346 7285 7286 7287 K2 KW41 PA459 PsaV PsaVI
scf_12387_135_contig_11	13422	c	A	A	A	A	A	A	A	A	A	c	346 7285 7286 7287 K2 KW41 PA459 PsaV PsaVI
scf_12387_135_contig_11	13470	g	A	A	A	A	A	A	A	A	A	g	346 7285 7286 7287 K2 KW41 PA459 PsaV PsaVI
scf_12387_135_contig_11	13488	c	G	G	G	G	G	G	G	G	G	c	346 7285 7286 7287 K2 KW41 PA459 PsaV PsaVI
scf_12387_135_contig_11	13527	c	A	A	A	A	A	A	A	A	A	c	346 7285 7286 7287 K2 KW41 PA459 PsaV PsaVI
scf_12387_135_contig_11	13580	g	A	A	A	A	A	A	A	A	A	g	346 7285 7286 7287 K2 KW41 PA459 PsaV PsaVI
scf_12387_135_contig_11	136	a	G	G	G	G	G	G	G	G	G	a	346 7285 7286 7287 K2 KW41 PA459 PsaV PsaVI
scf_12387_135_contig_11	13781	g	A	A	A	A	A	A	A	A	A	g	346 7285 7286 7287 K2 KW41 PA459 PsaV PsaVI
scf_12387_135_contig_11	1380	t	C	C	C	C	C	C	C	C	C	t	346 7285 7286 7287 K2 KW41 PA459 PsaV PsaVI
scf_12387_135_contig_11	13830	t	G	G	G	G	G	G	G	G	G	t	346 7285 7286 7287 K2 KW41 PA459 PsaV PsaVI
scf_12387_135_contig_11	13962	g	T	T	T	T	T	T	T	T	T	g	346 7285 7286 7287 K2 KW41 PA459 PsaV PsaVI
scf_12387_135_contig_11	13995	g	A	A	A	A	A	A	A	A	A	g	346 7285 7286 7287 K2 KW41 PA459 PsaV PsaVI
scf_12387_135_contig_11	1543	g	A	A	A	A	A	A	A	A	A	g	346 7285 7286 7287 K2 KW41 PA459 PsaV PsaVI
scf_12387_135_contig_11	1575	g	A	A	A	A	A	A	A	A	A	g	346 7285 7286 7287 K2 KW41 PA459 PsaV PsaVI
scf_12387_135_contig_11	1708	a	G	G	G	G	G	G	G	G	G	a	346 7285 7286 7287 K2 KW41 PA459 PsaV PsaVI
scf_12387_135_contig_11	1771	g	A	A	A	A	A	A	A	A	A	g	346 7285 7286 7287 K2 KW41 PA459 PsaV PsaVI
scf_12387_135_contig_11	1894	t	C	C	C	C	C	C	C	C	C	t	346 7285 7286 7287 K2 KW41 PA459 PsaV PsaVI
scf_12387_135_contig_11	1999	t	C	C	C	C	C	C	C	C	C	t	346 7285 7286 7287 K2 KW41 PA459 PsaV PsaVI
scf_12387_135_contig_11	5113	g	A	A	A	A	A	A	A	A	A	g	346 7285 7286 7287 K2 KW41 PA459 PsaV PsaVI
scf_12387_135_contig_11	5853	c	A	A	A	A	A	A	A	A	A	c	346 7285 7286 7287 K2 KW41 PA459 PsaV PsaVI
scf_12387_135_contig_11	627	t	A	A	A	A	A	A	A	A	A	t	346 7285 7286 7287 K2 KW41 PA459 PsaV PsaVI
scf_12387_135_contig_11	6326	t	C	C	C	C	C	C	C	C	C	t	346 7285 7286 7287 K2 KW41 PA459 PsaV PsaVI
scf_12387_135_contig_11	64	a	G	G	G	G	G	G	G	G	G	a	346 7285 7286 7287 K2 KW41 PA459 PsaV PsaVI
scf_12387_135_contig_11	6713	a	G	G	G	G	G	G	G	G	G	a	346 7285 7286 7287 K2 KW41 PA459 PsaV PsaVI
scf_12387_135_contig_11	6784	g	A	A	A	A	A	A	A	A	A	g	346 7285 7286 7287 K2 KW41 PA459 PsaV PsaVI
scf_12387_135_contig_11	6872	c	T	T	T	T	T	T	T	T	T	c	346 7285 7286 7287 K2 KW41 PA459 PsaV PsaVI
scf_12387_135_contig_11	6890	c	T	T	T	T	T	T	T	T	T	c	346 7285 7286 7287 K2 KW41 PA459 PsaV PsaVI
scf_12387_135_contig_11	7133	g	A	A	A	A	A	A	A	A	A	g	346 7285 7286 7287 K2 KW41 PA459 PsaV PsaVI
scf_12387_135_contig_11	7265	c	T	T	T	T	T	T	T	T	T	c	346 7285 7286 7287 K2 KW41 PA459 PsaV PsaVI
scf_12387_135_contig_11	7298	g	A	A	A	A	A	A	A	A	A	g	346 7285 7286 7287 K2 KW41 PA459 PsaV PsaVI
scf_12387_135_contig_11	7742	a	G	G	G	G	G	G	G	G	G	a	346 7285 7286 7287 K2 KW41 PA459 PsaV PsaVI
scf_12387_135_contig_11	7769	g	A	A	A	A	A	A	A	A	A	g	346 7285 7286 7287 K2 KW41 PA459 PsaV PsaVI
scf_12387_135_contig_11	8225	a	T	T	T	T	T	T	T	T	T	a	346 7285 7286 7287 K2 KW41 PA459 PsaV PsaVI
scf_12387_135_contig_11	839	g	A	A	A	A	A	A	A	A	A	g	346 7285 7286 7287 K2 KW41 PA459 PsaV PsaVI
scf_12387_135_contig_11	843	g	A	A	A	A	A	A	A	A	A	g	346 7285 7286 7287 K2 KW41 PA459 PsaV PsaVI
scf_12387_135_contig_11	8683	a	G	G	G	G	G	G	G	G	G	a	346 7285 7286 7287 K2 KW41 PA459 PsaV PsaVI
scf_12387_135_contig_11	8725	a	G	G	G	G	G	G	G	G	G	a	346 7285 7286 7287 K2 KW41 PA459 PsaV PsaVI
scf_12387_135_contig_11	879	g	A	A	A	A	A	A	A	A	A	g	346 7285 7286 7287 K2 KW41 PA459 PsaV PsaVI
scf_12387_135_contig_11	8917	g	C	C	C	C	C	C	C	C	C	g	346 7285 7286 7287 K2 KW41 PA459 PsaV PsaVI
scf_12387_135_contig_11	9124	g	A	A	A	A	A	A	A	A	A	g	346 7285 7286 7287 K2 KW41 PA459 PsaV PsaVI
scf_12387_135_contig_11	9361	a	C	C	C	C	C	C	C	C	C	a	346 7285 7286 7287 K2 KW41 PA459 PsaV PsaVI
scf_12387_135_contig_11	9475	c	T	T	T	T	T	T	T	T	T	c	346 7285 7286 7287 K2 KW41 PA459 PsaV PsaVI
scf_12387_135_contig_11	9564	c	A	A	A	A	A	A	A	A	A	c	346 7285 7286 7287 K2 KW41 PA459 PsaV PsaVI
scf_12387_135_contig_11	9886	g	A	A	A	A	A	A	A	A	A	g	346 7285 7286 7287 K2 KW41 PA459 PsaV PsaVI
scf_12387_135_contig_11	9939	g	A	A	A	A	A	A	A	A	A	g	346 7285 7286 7287 K2 KW41 PA459 PsaV PsaVI
scf_12387_135_contig_1	129	t	C	C	C	C	C	C	C	C	C	t	346 7285 7286 7287 K2 KW41 PA459 PsaV PsaVI
scf_12387_135_contig_1	304	g	A	A	A	A	A	A	A	A	A	g	346 7285 7286 7287 K2 KW41 PA459 PsaV PsaVI
scf_12387_135_contig_1	334	c	T	T	T	T	T	T	T	T	T	c	346 7285 7286 7287 K2 KW41 PA459 PsaV PsaVI
scf_12387_135_contig_1	3349	a	G	G	G	G	G	G	G	G	G	a	346 7285 7286 7287 K2 KW41 PA459 PsaV PsaVI
scf_12387_135_contig_1	3350	a	G	G	G	G	G	G	G	G	G	a	346 7285 7286 7287 K2 KW41 PA459 PsaV PsaVI
scf_12387_135_contig_1	3614	c	T	T	T	T	T	T	T	T	T	c	346 7285 7286 7287 K2 KW41 PA459 PsaV PsaVI
scf_12387_135_contig_1	4009	a	G	G	G	G	G	G	G	G	G	a	346 7285 7286 7287 K2 KW41 PA459 PsaV PsaVI
scf_12387_135_contig_1	422	c	T	T	T	T	T	T	T	T	T	c	346 7285 7286 7287 K2 KW41 PA459 PsaV PsaVI
scf_12387_135_contig_1	4388	t	C	C	C	C	C	C	C	C	C	t	346 7285 7286 7287 K2 KW41 PA459 PsaV PsaVI
scf_12387_135_contig_1	4568	g	A	A	A	A	A	A	A	A	A	g	346 7285 7286 7287 K2 KW41 PA459 PsaV PsaVI
scf_12387_135_contig_1	5110	g	A	A	A	A	A	A	A	A	A	g	346 7285 7286 7287 K2 KW41 PA459 PsaV PsaVI
scf_12387_135_contig_1	5308	c	T	T	T	T	T	T	T	T	T	c	346 7285 7286 7287 K2 KW41 PA459 PsaV PsaVI
scf_12387_135_contig_1	5360	g	A	A	A	A	A	A	A	A	A	g	346 7285 7286 7287 K2 KW41 PA459 PsaV PsaVI
scf_12387_135_contig_1	5609	a	T	T	T	T	T	T	T	T	T	a	346 7285 7286 7287 K2 KW41 PA459 PsaV PsaVI
scf_12387_135_contig_1	5797	a	G	G	G	G	G	G	G	G	G	a	346 7285 7286 7287 K2 KW41 PA459 PsaV PsaVI
scf_12387_135_contig_1	5798	a	G	G	G	G	G	G	G	G	G	a	346 7285 7286 7287 K2 KW41 PA459 PsaV PsaVI
scf_12387_135_contig_1	580	t	C	C	C	C	C	C	C	C	C	t	346 7285 7286 7287 K2 KW41 PA459 PsaV PsaVI
scf_12387_135_contig_1	5915	c	T	T	T	T	T	T	T	T	T	c	346 7285 7286 7287 K2 KW41 PA459 PsaV PsaVI
scf_12387_135_contig_1	5939	c	T	T	T	T	T	T	T	T	T	c	346 7285 7286 7287 K2 KW41 PA459 PsaV PsaVI
scf_12387_135_contig_1	6029	t	C	C	C	C	C	C	C	C	C	t	346 7285 7286 7287 K2 KW41 PA459 PsaV PsaVI
scf_12387_135_contig_1	6071	g	T	T	T	T	T	T	T	T	T	g	346 7285 7286 7287 K2 KW41 PA459 PsaV PsaVI
scf_12387_135_contig_1	6293	a	G	G	G	G	G	G	G	G	G	a	346 7285 7286 7287 K2 KW41 PA459 PsaV PsaVI
scf_12387_135_contig_1	6344	c	T	T	T	T	T	T	T	T	T	c	346 7285 7286 7287 K2 KW41 PA459 PsaV PsaVI
scf_12387_135_contig_1	6356	g	A	A	A	A	A	A	A	A	A	g	346 7285 7286 7287 K2 KW41 PA459 PsaV PsaVI
scf_12387_135_contig_1	6722	g	A	A	A	A	A	A	A	A	A	g	346 7285 7286 7287 K2 KW41 PA459 PsaV PsaVI
scf_12387_135_contig_1	6950	c	T	T	T	T	T	T	T	T	T	c	346 7285 7286 7287 K2 KW41 PA459 PsaV PsaVI
scf_12387_135_contig_1	7049	g	A	A	A	A	A	A	A	A	A	g	346 7285 7286 7287 K2 KW41 PA459 PsaV PsaVI
scf_12387_135_contig_1	7208	c	T	T	T	T	T	T	T	T	T	c	346 7285 7286 7287 K2 KW41 PA459 PsaV PsaVI
scf_12387_135_contig_1	749	c	G	G	G	G	G	G	G	G	G	c	346 7285 7286 7287 K2 KW41 PA459 PsaV PsaVI
scf_12387_135_contig_1	7682	c	A	A	A	A	A	A	A	A	A	c	346 7285 7286 7287 K2 KW41 PA459 PsaV PsaVI
scf_12387_135_contig_3	119	c	T	T	T	T	T	T	T	T	T	c	346 7285 7286 7287 K2 KW41 PA459 PsaV PsaVI
scf_12387_135_contig_3	963	g	A	A	A	A	A	A	A	A	A	g	346 7285 7286 7287 K2 KW41 PA459 PsaV PsaVI
scf_12387_135_contig_5	418	c	T	T	T	T	T	T	T	T	T	c	346 7285 7286 7287 K2 KW41 PA459 PsaV PsaVI
scf_12387_135_contig_7	1304	c	A	A	A	A	A	A	A	A	A	c	346 7285 7286 7287 K2 KW41 PA459 PsaV PsaVI
scf_12387_135_contig_7	1591	g	A	A	A	A	A	A	A	A	A	g	346 7285 7286 7287 K2 KW41 PA459 PsaV PsaVI
scf_12387_135_contig_7	1593	c	T	T	T	T	T	T	T	T	T	c	346 7285 7286 7287 K2 KW41 PA459 PsaV PsaVI
scf_12387_135_contig_7	1699	t	C	C	C	C	C	C	C	C	C	t	346 7285 7286 7287 K2 KW41 PA459 PsaV PsaVI
scf_12387_135_contig_7	1800	c	T	T	T	T	T	T	T	T	T	c	346 7285 7286 7287 K2 KW41 PA459 PsaV PsaVI
scf_12387_135_contig_7	1899	c	T	T	T	T	T	T	T	T	T	c	346 7285 7286 7287 K2 KW41 PA459 PsaV PsaVI
scf_12387_135_contig_7	1923	g	C	C	C	C	C	C	C	C	C	g	346 7285 7286 7287 K2 KW41 PA459 PsaV PsaVI
scf_12387_135_contig_7	232	a	C	C	C	C	C	C	C	C	C	a	346 7285 7286 7287 K2 KW41 PA459 PsaV PsaVI
scf_12387_135_contig_7	2457	g	A	A	A	A	A	A	A	A	A	g	346 7285 7286 7287 K2 KW41 PA459 PsaV PsaVI
scf_12387_135_contig_7	2548	c	T	T	T	T	T	T	T	T	T	c	346 7285 7286 7287 K2 KW41 PA459 PsaV PsaVI
scf_12387_135_contig_7	2896	c	T	T	T	T	T	T	T	T	T	c	346 7285 7286 7287 K2 KW41 PA459 PsaV PsaVI
scf_12387_135_contig_7	3043	g	A	A	A	A	A	A	A	A	A	g	346 7285 7286 7287 K2 KW41 PA459 PsaV PsaVI
scf_12387_135_contig_7	3052	c	T	T	T	T	T	T	T	T	T	c	346 7285 7286 7287 K2 KW41 PA459 PsaV PsaVI
scf_12387_135_contig_7	3316	g	A	A	A	A	A	A	A	A	A	g	346 7285 7286 7287 K2 KW41 PA459 PsaV PsaVI
scf_12387_135_contig_7	3412	g	A	A	A	A	A	A	A	A	A	g	346 7285 7286 7287 K2 KW41 PA459 PsaV PsaVI
scf_12387_135_contig_7	3424	c	T	T	T	T	T	T	T	T	T	c	346 7285 7286 7287 K2 KW41 PA459 PsaV PsaVI
scf_12387_135_contig_7	3427	g	T	T	T	T	T	T	T	T	T	g	346 7285 7286 7287 K2 KW41 PA459 PsaV PsaVI
scf_12387_135_contig_7	3619	t	C	C	C	C	C	C	C	C	C	t	346 7285 7286 7287 K2 KW41 PA459 PsaV PsaVI
scf_12387_135_contig_7	3746	t	C	C	C	C	C	C	C	C	C	t	346 7285 7286 7287 K2 KW41 PA459 PsaV PsaVI
scf_12387_135_contig_7	3874	t	C	C	C	C	C	C	C	C	C	t	346 7285 7286 7287 K2 KW41 PA459 PsaV PsaVI
scf_12387_135_contig_7	4441	c	T	T	T	T	T	T	T	T	T	c	346 7285 7286 7287 K2 KW41 PA459 PsaV PsaVI
scf_12387_135_contig_7	4553	g	A	A	A	A	A	A	A	A	A	g	346 7285 7286 7287 K2 KW41 PA459 PsaV PsaVI
scf_12387_135_contig_7	4762	a	G	G	G	G	G	G	G	G	G	a	346 7285 7286 7287 K2 KW41 PA459 PsaV PsaVI
scf_12387_135_contig_7	5089	a	C	C	C	C	C	C	C	C	C	a	346 7285 7286 7287 K2 KW41 PA459 PsaV PsaVI
scf_12387_135_contig_7	5508	g	A	A	A	A	A	A	A	A	A	g	346 7285 7286 7287 K2 KW41 PA459 PsaV PsaVI
scf_12387_135_contig_7	5562	t	C	C	C	C	C	C	C	C	C	t	346 7285 7286 7287 K2 KW41 PA459 PsaV PsaVI
scf_12387_135_contig_7	5622	c	T	T	T	T	T	T	T	T	T	c	346 7285 7286 7287 K2 KW41 PA459 PsaV PsaVI
scf_12387_135_contig_7	7772	a	C	C	C	C	C	C	C	C	C	a	346 7285 7286 7287 K2 KW41 PA459 PsaV PsaVI
scf_12387_135_contig_7	7852	g	A	A	A	A	A	A	A	A	A	g	346 7285 7286 7287 K2 KW41 PA459 PsaV PsaVI
scf_12387_135_contig_7	7870	c	A	A	A	A	A	A	A	A	A	c	346 7285 7286 7287 K2 KW41 PA459 PsaV PsaVI
scf_12387_135_contig_7	8014	a	G	G	G	G	G	G	G	G	G	a	346 7285 7286 7287 K2 KW41 PA459 PsaV PsaVI
scf_12387_135_contig_7	8118	c	T	T	T	T	T	T	T	T	T	c	346 7285 7286 7287 K2 KW41 PA459 PsaV PsaVI
scf_12387_135_contig_9	1163	c	T	T	T	T	T	T	T	T	T	c	346 7285 7286 7287 K2 KW41 PA459 PsaV PsaVI
scf_12387_135_contig_9	1256	t	C	C	C	C	C	C	C	C	C	t	346 7285 7286 7287 K2 KW41 PA459 PsaV PsaVI
scf_12387_135_contig_9	323	g	A	A	A	A	A	A	A	A	A	g	346 7285 7286 7287 K2 KW41 PA459 PsaV PsaVI
scf_12387_135_contig_9	389	g	A	A	A	A	A	A	A	A	A	g	346 7285 7286 7287 K2 KW41 PA459 PsaV PsaVI
scf_12387_135_contig_9	413	t	C	C	C	C	C	C	C	C	C	t	346 7285 7286 7287 K2 KW41 PA459 PsaV PsaVI
scf_12387_135_contig_9	52	a	G	G	G	G	G	G	G	G	G	a	346 7285 7286 7287 K2 KW41 PA459 PsaV PsaVI
scf_12387_136_contig_11	1012	a	G	G	G	G	G	G	G	G	G	a	346 7285 7286 7287 K2 KW41 PA459 PsaV PsaVI
scf_12387_136_contig_11	1133	g	C	C	C	C	C	C	C	C	C	g	346 7285 7286 7287 K2 KW41 PA459 PsaV PsaVI
scf_12387_136_contig_11	299	c	T	T	T	T	T	T	T	T	T	c	346 7285 7286 7287 K2 KW41 PA459 PsaV PsaVI
scf_12387_136_contig_11	341	c	T	T	T	T	T	T	T	T	T	c	346 7285 7286 7287 K2 KW41 PA459 PsaV PsaVI
scf_12387_136_contig_11	560	t	G	G	G	G	G	G	G	G	G	t	346 7285 7286 7287 K2 KW41 PA459 PsaV PsaVI
scf_12387_136_contig_13	10321	t	C	C	C	C	C	C	C	C	C	t	346 7285 7286 7287 K2 KW41 PA459 PsaV PsaVI
scf_12387_136_contig_13	10402	t	A	A	A	A	A	A	A	A	A	t	346 7285 7286 7287 K2 KW41 PA459 PsaV PsaVI
scf_12387_136_contig_13	10486	t	C	C	C	C	C	C	C	C	C	t	346 7285 7286 7287 K2 KW41 PA459 PsaV PsaVI
scf_12387_136_contig_13	10524	c	T	T	T	T	T	T	T	T	T	c	346 7285 7286 7287 K2 KW41 PA459 PsaV PsaVI
scf_12387_136_contig_13	10726	t	C	C	C	C	C	C	C	C	C	t	346 7285 7286 7287 K2 KW41 PA459 PsaV PsaVI
scf_12387_136_contig_13	10809	c	T	T	T	T	T	T	T	T	T	c	346 7285 7286 7287 K2 KW41 PA459 PsaV PsaVI
scf_12387_136_contig_13	11069	g	A	A	A	A	A	A	A	A	A	g	346 7285 7286 7287 K2 KW41 PA459 PsaV PsaVI
scf_12387_136_contig_13	14065	c	T	T	T	T	T	T	T	T	T	c	346 7285 7286 7287 K2 KW41 PA459 PsaV PsaVI
scf_12387_136_contig_13	15136	g	A	A	A	A	A	A	A	A	A	g	346 7285 7286 7287 K2 KW41 PA459 PsaV PsaVI
scf_12387_136_contig_13	15758	a	G	G	G	G	G	G	G	G	G	a	346 7285 7286 7287 K2 KW41 PA459 PsaV PsaVI
scf_12387_136_contig_13	19689	a	C	C	C	C	C	C	C	C	C	a	346 7285 7286 7287 K2 KW41 PA459 PsaV PsaVI
scf_12387_136_contig_13	19727	g	A	A	A	A	A	A	A	A	A	g	346 7285 7286 7287 K2 KW41 PA459 PsaV PsaVI
scf_12387_136_contig_13	19844	t	G	G	G	G	G	G	G	G	G	t	346 7285 7286 7287 K2 KW41 PA459 PsaV PsaVI
scf_12387_136_contig_13	20039	a	G	G	G	G	G	G	G	G	G	a	346 7285 7286 7287 K2 KW41 PA459 PsaV PsaVI
scf_12387_136_contig_13	20138	c	A	A	A	A	A	A	A	A	A	c	346 7285 7286 7287 K2 KW41 PA459 PsaV PsaVI
scf_12387_136_contig_13	20168	t	C	C	C	C	C	C	C	C	C	t	346 7285 7286 7287 K2 KW41 PA459 PsaV PsaVI
scf_12387_136_contig_13	20252	t	C	C	C	C	C	C	C	C	C	t	346 7285 7286 7287 K2 KW41 PA459 PsaV PsaVI
scf_12387_136_contig_13	20318	t	C	C	C	C	C	C	C	C	C	t	346 7285 7286 7287 K2 KW41 PA459 PsaV PsaVI
scf_12387_136_contig_13	20345	g	A	A	A	A	A	A	A	A	A	g	346 7285 7286 7287 K2 KW41 PA459 PsaV PsaVI
scf_12387_136_contig_13	20430	c	T	T	T	T	T	T	T	T	T	c	346 7285 7286 7287 K2 KW41 PA459 PsaV PsaVI
scf_12387_136_contig_13	20674	a	G	G	G	G	G	G	G	G	G	a	346 7285 7286 7287 K2 KW41 PA459 PsaV PsaVI
scf_12387_136_contig_13	21776	g	A	A	A	A	A	A	A	A	A	g	346 7285 7286 7287 K2 KW41 PA459 PsaV PsaVI
scf_12387_136_contig_13	3231	c	T	T	T	T	T	T	T	T	T	c	346 7285 7286 7287 K2 KW41 PA459 PsaV PsaVI
scf_12387_136_contig_13	3838	t	C	C	C	C	C	C	C	C	C	t	346 7285 7286 7287 K2 KW41 PA459 PsaV PsaVI
scf_12387_136_contig_13	4501	g	A	A	A	A	A	A	A	A	A	g	346 7285 7286 7287 K2 KW41 PA459 PsaV PsaVI
scf_12387_136_contig_13	6497	c	T	T	T	T	T	T	T	T	T	c	346 7285 7286 7287 K2 KW41 PA459 PsaV PsaVI
scf_12387_136_contig_13	7484	c	T	T	T	T	T	T	T	T	T	c	346 7285 7286 7287 K2 KW41 PA459 PsaV PsaVI
scf_12387_136_contig_13	8540	a	G	G	G	G	G	G	G	G	G	a	346 7285 7286 7287 K2 KW41 PA459 PsaV PsaVI
scf_12387_136_contig_13	8815	a	G	G	G	G	G	G	G	G	G	a	346 7285 7286 7287 K2 KW41 PA459 PsaV PsaVI
scf_12387_136_contig_13	8863	c	T	T	T	T	T	T	T	T	T	c	346 7285 7286 7287 K2 KW41 PA459 PsaV PsaVI
scf_12387_136_contig_13	9158	c	T	T	T	T	T	T	T	T	T	c	346 7285 7286 7287 K2 KW41 PA459 PsaV PsaVI
scf_12387_136_contig_13	9281	g	A	A	A	A	A	A	A	A	A	g	346 7285 7286 7287 K2 KW41 PA459 PsaV PsaVI
scf_12387_136_contig_13	9332	g	A	A	A	A	A	A	A	A	A	g	346 7285 7286 7287 K2 KW41 PA459 PsaV PsaVI
scf_12387_136_contig_13	9377	t	C	C	C	C	C	C	C	C	C	t	346 7285 7286 7287 K2 KW41 PA459 PsaV PsaVI
scf_12387_136_contig_1	1832	c	T	T	T	T	T	T	T	T	T	c	346 7285 7286 7287 K2 KW41 PA459 PsaV PsaVI
scf_12387_136_contig_1	2049	c	T	T	T	T	T	T	T	T	T	c	346 7285 7286 7287 K2 KW41 PA459 PsaV PsaVI
scf_12387_136_contig_1	2376	t	C	C	C	C	C	C	C	C	C	t	346 7285 7286 7287 K2 KW41 PA459 PsaV PsaVI
scf_12387_136_contig_1	3229	t	C	C	C	C	C	C	C	C	C	t	346 7285 7286 7287 K2 KW41 PA459 PsaV PsaVI
scf_12387_136_contig_1	3438	c	A	A	A	A	A	A	A	A	A	c	346 7285 7286 7287 K2 KW41 PA459 PsaV PsaVI
scf_12387_136_contig_1	4094	g	A	A	A	A	A	A	A	A	A	g	346 7285 7286 7287 K2 KW41 PA459 PsaV PsaVI
scf_12387_136_contig_1	4097	g	C	C	C	C	C	C	C	C	C	g	346 7285 7286 7287 K2 KW41 PA459 PsaV PsaVI
scf_12387_136_contig_1	4265	c	A	A	A	A	A	A	A	A	A	c	346 7285 7286 7287 K2 KW41 PA459 PsaV PsaVI
scf_12387_136_contig_1	5174	t	C	C	C	C	C	C	C	C	C	t	346 7285 7286 7287 K2 KW41 PA459 PsaV PsaVI
scf_12387_136_contig_1	5230	c	A	A	A	A	A	A	A	A	A	c	346 7285 7286 7287 K2 KW41 PA459 PsaV PsaVI
scf_12387_136_contig_1	5291	c	G	G	G	G	G	G	G	G	G	c	346 7285 7286 7287 K2 KW41 PA459 PsaV PsaVI
scf_12387_136_contig_1	5342	a	G	G	G	G	G	G	G	G	G	a	346 7285 7286 7287 K2 KW41 PA459 PsaV PsaVI
scf_12387_136_contig_1	943	g	A	A	A	A	A	A	A	A	A	g	346 7285 7286 7287 K2 KW41 PA459 PsaV PsaVI
scf_12387_136_contig_3	1158	c	G	G	G	G	G	G	G	G	G	c	346 7285 7286 7287 K2 KW41 PA459 PsaV PsaVI
scf_12387_136_contig_3	1190	g	A	A	A	A	A	A	A	A	A	g	346 7285 7286 7287 K2 KW41 PA459 PsaV PsaVI
scf_12387_136_contig_3	1284	g	A	A	A	A	A	A	A	A	A	g	346 7285 7286 7287 K2 KW41 PA459 PsaV PsaVI
scf_12387_136_contig_3	1296	a	G	G	G	G	G	G	G	G	G	a	346 7285 7286 7287 K2 KW41 PA459 PsaV PsaVI
scf_12387_136_contig_3	1464	c	A	A	A	A	A	A	A	A	A	c	346 7285 7286 7287 K2 KW41 PA459 PsaV PsaVI
scf_12387_136_contig_3	1552	g	T	T	T	T	T	T	T	T	T	g	346 7285 7286 7287 K2 KW41 PA459 PsaV PsaVI
scf_12387_136_contig_3	1641	g	A	A	A	A	A	A	A	A	A	g	346 7285 7286 7287 K2 KW41 PA459 PsaV PsaVI
scf_12387_136_contig_3	1692	g	A	A	A	A	A	A	A	A	A	g	346 7285 7286 7287 K2 KW41 PA459 PsaV PsaVI
scf_12387_136_contig_3	1718	g	T	T	T	T	T	T	T	T	T	g	346 7285 7286 7287 K2 KW41 PA459 PsaV PsaVI
scf_12387_136_contig_3	209	a	C	C	C	C	C	C	C	C	C	a	346 7285 7286 7287 K2 KW41 PA459 PsaV PsaVI
scf_12387_136_contig_3	258	c	T	T	T	T	T	T	T	T	T	c	346 7285 7286 7287 K2 KW41 PA459 PsaV PsaVI
scf_12387_136_contig_3	282	c	T	T	T	T	T	T	T	T	T	c	346 7285 7286 7287 K2 KW41 PA459 PsaV PsaVI
scf_12387_136_contig_3	345	c	T	T	T	T	T	T	T	T	T	c	346 7285 7286 7287 K2 KW41 PA459 PsaV PsaVI
scf_12387_136_contig_3	513	c	G	G	G	G	G	G	G	G	G	c	346 7285 7286 7287 K2 KW41 PA459 PsaV PsaVI
scf_12387_136_contig_3	522	t	G	G	G	G	G	G	G	G	G	t	346 7285 7286 7287 K2 KW41 PA459 PsaV PsaVI
scf_12387_136_contig_3	866	c	A	A	A	A	A	A	A	A	A	c	346 7285 7286 7287 K2 KW41 PA459 PsaV PsaVI
scf_12387_136_contig_5	1220	a	C	C	C	C	C	C	C	C	C	a	346 7285 7286 7287 K2 KW41 PA459 PsaV PsaVI
scf_12387_136_contig_5	131	t	C	C	C	C	C	C	C	C	C	t	346 7285 7286 7287 K2 KW41 PA459 PsaV PsaVI
scf_12387_136_contig_5	1596	g	A	A	A	A	A	A	A	A	A	g	346 7285 7286 7287 K2 KW41 PA459 PsaV PsaVI
scf_12387_136_contig_5	1788	t	C	C	C	C	C	C	C	C	C	t	346 7285 7286 7287 K2 KW41 PA459 PsaV PsaVI
scf_12387_136_contig_5	1887	g	A	A	A	A	A	A	A	A	A	g	346 7285 7286 7287 K2 KW41 PA459 PsaV PsaVI
scf_12387_136_contig_5	2479	c	T	T	T	T	T	T	T	T	T	c	346 7285 7286 7287 K2 KW41 PA459 PsaV PsaVI
scf_12387_136_contig_5	2548	t	C	C	C	C	C	C	C	C	C	t	346 7285 7286 7287 K2 KW41 PA459 PsaV PsaVI
scf_12387_136_contig_5	2666	g	T	T	T	T	T	T	T	T	T	g	346 7285 7286 7287 K2 KW41 PA459 PsaV PsaVI
scf_12387_136_contig_5	2717	a	G	G	G	G	G	G	G	G	G	a	346 7285 7286 7287 K2 KW41 PA459 PsaV PsaVI
scf_12387_136_contig_5	2720	a	G	G	G	G	G	G	G	G	G	a	346 7285 7286 7287 K2 KW41 PA459 PsaV PsaVI
scf_12387_136_contig_5	281	c	G	G	G	G	G	G	G	G	G	c	346 7285 7286 7287 K2 KW41 PA459 PsaV PsaVI
scf_12387_136_contig_5	2816	t	G	G	G	G	G	G	G	G	G	t	346 7285 7286 7287 K2 KW41 PA459 PsaV PsaVI
scf_12387_136_contig_5	2844	t	G	G	G	G	G	G	G	G	G	t	346 7285 7286 7287 K2 KW41 PA459 PsaV PsaVI
scf_12387_136_contig_5	3384	t	G	G	G	G	G	G	G	G	G	t	346 7285 7286 7287 K2 KW41 PA459 PsaV PsaVI
scf_12387_136_contig_5	3570	t	G	G	G	G	G	G	G	G	G	t	346 7285 7286 7287 K2 KW41 PA459 PsaV PsaVI
scf_12387_136_contig_5	3904	c	G	G	G	G	G	G	G	G	G	c	346 7285 7286 7287 K2 KW41 PA459 PsaV PsaVI
scf_12387_136_contig_5	4045	g	A	A	A	A	A	A	A	A	A	g	346 7285 7286 7287 K2 KW41 PA459 PsaV PsaVI
scf_12387_136_contig_5	4046	c	A	A	A	A	A	A	A	A	A	c	346 7285 7286 7287 K2 KW41 PA459 PsaV PsaVI
scf_12387_136_contig_5	4111	g	A	A	A	A	A	A	A	A	A	g	346 7285 7286 7287 K2 KW41 PA459 PsaV PsaVI
scf_12387_136_contig_5	4159	c	T	T	T	T	T	T	T	T	T	c	346 7285 7286 7287 K2 KW41 PA459 PsaV PsaVI
scf_12387_136_contig_5	4249	g	T	T	T	T	T	T	T	T	T	g	346 7285 7286 7287 K2 KW41 PA459 PsaV PsaVI
scf_12387_136_contig_5	4264	c	T	T	T	T	T	T	T	T	T	c	346 7285 7286 7287 K2 KW41 PA459 PsaV PsaVI
scf_12387_136_contig_5	4341	g	A	A	A	A	A	A	A	A	A	g	346 7285 7286 7287 K2 KW41 PA459 PsaV PsaVI
scf_12387_136_contig_5	4702	t	C	C	C	C	C	C	C	C	C	t	346 7285 7286 7287 K2 KW41 PA459 PsaV PsaVI
scf_12387_136_contig_5	506	c	T	T	T	T	T	T	T	T	T	c	346 7285 7286 7287 K2 KW41 PA459 PsaV PsaVI
scf_12387_136_contig_5	5307	c	G	G	G	G	G	G	G	G	G	c	346 7285 7286 7287 K2 KW41 PA459 PsaV PsaVI
scf_12387_136_contig_5	542	a	G	G	G	G	G	G	G	G	G	a	346 7285 7286 7287 K2 KW41 PA459 PsaV PsaVI
scf_12387_136_contig_5	5991	g	A	A	A	A	A	A	A	A	A	g	346 7285 7286 7287 K2 KW41 PA459 PsaV PsaVI
scf_12387_136_contig_5	6154	t	C	C	C	C	C	C	C	C	C	t	346 7285 7286 7287 K2 KW41 PA459 PsaV PsaVI
scf_12387_136_contig_5	628	g	A	A	A	A	A	A	A	A	A	g	346 7285 7286 7287 K2 KW41 PA459 PsaV PsaVI
scf_12387_136_contig_5	7068	c	T	T	T	T	T	T	T	T	T	c	346 7285 7286 7287 K2 KW41 PA459 PsaV PsaVI
scf_12387_136_contig_5	7113	g	A	A	A	A	A	A	A	A	A	g	346 7285 7286 7287 K2 KW41 PA459 PsaV PsaVI
scf_12387_136_contig_5	7119	g	A	A	A	A	A	A	A	A	A	g	346 7285 7286 7287 K2 KW41 PA459 PsaV PsaVI
scf_12387_136_contig_5	7161	a	G	G	G	G	G	G	G	G	G	a	346 7285 7286 7287 K2 KW41 PA459 PsaV PsaVI
scf_12387_136_contig_5	927	c	T	T	T	T	T	T	T	T	T	c	346 7285 7286 7287 K2 KW41 PA459 PsaV PsaVI
scf_12387_136_contig_9	10938	t	C	C	C	C	C	C	C	C	C	t	346 7285 7286 7287 K2 KW41 PA459 PsaV PsaVI
scf_12387_136_contig_9	4153	c	T	T	T	T	T	T	T	T	T	c	346 7285 7286 7287 K2 KW41 PA459 PsaV PsaVI
scf_12387_136_contig_9	4195	c	A	A	A	A	A	A	A	A	A	c	346 7285 7286 7287 K2 KW41 PA459 PsaV PsaVI
scf_12387_136_contig_9	4232	c	T	T	T	T	T	T	T	T	T	c	346 7285 7286 7287 K2 KW41 PA459 PsaV PsaVI
scf_12387_136_contig_9	4490	c	T	T	T	T	T	T	T	T	T	c	346 7285 7286 7287 K2 KW41 PA459 PsaV PsaVI
scf_12387_136_contig_9	4585	g	A	A	A	A	A	A	A	A	A	g	346 7285 7286 7287 K2 KW41 PA459 PsaV PsaVI
scf_12387_136_contig_9	4646	t	C	C	C	C	C	C	C	C	C	t	346 7285 7286 7287 K2 KW41 PA459 PsaV PsaVI
scf_12387_136_contig_9	9076	a	G	G	G	G	G	G	G	G	G	a	346 7285 7286 7287 K2 KW41 PA459 PsaV PsaVI
scf_12387_136_contig_9	9086	g	A	A	A	A	A	A	A	A	A	g	346 7285 7286 7287 K2 KW41 PA459 PsaV PsaVI
scf_12387_136_contig_9	9087	c	T	T	T	T	T	T	T	T	T	c	346 7285 7286 7287 K2 KW41 PA459 PsaV PsaVI
scf_12387_136_contig_9	9142	t	G	G	G	G	G	G	G	G	G	t	346 7285 7286 7287 K2 KW41 PA459 PsaV PsaVI
scf_12387_136_contig_9	9199	t	C	C	C	C	C	C	C	C	C	t	346 7285 7286 7287 K2 KW41 PA459 PsaV PsaVI
scf_12387_136_contig_9	9582	c	G	G	G	G	G	G	G	G	G	c	346 7285 7286 7287 K2 KW41 PA459 PsaV PsaVI
scf_12387_136_contig_9	9759	g	A	A	A	A	A	A	A	A	A	g	346 7285 7286 7287 K2 KW41 PA459 PsaV PsaVI
scf_12387_147_contig_1	11249	t	C	C	C	C	C	C	C	C	C	t	346 7285 7286 7287 K2 KW41 PA459 PsaV PsaVI
scf_12387_147_contig_1	11334	t	C	C	C	C	C	C	C	C	C	t	346 7285 7286 7287 K2 KW41 PA459 PsaV PsaVI
scf_12387_147_contig_1	12131	t	C	C	C	C	C	C	C	C	C	t	346 7285 7286 7287 K2 KW41 PA459 PsaV PsaVI
scf_12387_147_contig_1	12395	a	G	G	G	G	G	G	G	G	G	a	346 7285 7286 7287 K2 KW41 PA459 PsaV PsaVI
scf_12387_147_contig_1	12473	g	C	C	C	C	C	C	C	C	C	g	346 7285 7286 7287 K2 KW41 PA459 PsaV PsaVI
scf_12387_147_contig_1	12488	g	A	A	A	A	A	A	A	A	A	g	346 7285 7286 7287 K2 KW41 PA459 PsaV PsaVI
scf_12387_147_contig_1	12722	t	C	C	C	C	C	C	C	C	C	t	346 7285 7286 7287 K2 KW41 PA459 PsaV PsaVI
scf_12387_147_contig_1	13322	g	T	T	T	T	T	T	T	T	T	g	346 7285 7286 7287 K2 KW41 PA459 PsaV PsaVI
scf_12387_147_contig_1	236	t	C	C	C	C	C	C	C	C	C	t	346 7285 7286 7287 K2 KW41 PA459 PsaV PsaVI
scf_12387_147_contig_1	357	t	C	C	C	C	C	C	C	C	C	t	346 7285 7286 7287 K2 KW41 PA459 PsaV PsaVI
scf_12387_147_contig_1	360	c	A	A	A	A	A	A	A	A	A	c	346 7285 7286 7287 K2 KW41 PA459 PsaV PsaVI
scf_12387_147_contig_1	5047	a	G	G	G	G	G	G	G	G	G	a	346 7285 7286 7287 K2 KW41 PA459 PsaV PsaVI
scf_12387_147_contig_1	5062	g	T	T	T	T	T	T	T	T	T	g	346 7285 7286 7287 K2 KW41 PA459 PsaV PsaVI
scf_12387_147_contig_1	5566	c	T	T	T	T	T	T	T	T	T	c	346 7285 7286 7287 K2 KW41 PA459 PsaV PsaVI
scf_12387_147_contig_1	6007	a	G	G	G	G	G	G	G	G	G	a	346 7285 7286 7287 K2 KW41 PA459 PsaV PsaVI
scf_12387_147_contig_1	6147	c	T	T	T	T	T	T	T	T	T	c	346 7285 7286 7287 K2 KW41 PA459 PsaV PsaVI
scf_12387_147_contig_1	6195	t	G	G	G	G	G	G	G	G	G	t	346 7285 7286 7287 K2 KW41 PA459 PsaV PsaVI
scf_12387_147_contig_1	6516	c	T	T	T	T	T	T	T	T	T	c	346 7285 7286 7287 K2 KW41 PA459 PsaV PsaVI
scf_12387_147_contig_1	6573	a	G	G	G	G	G	G	G	G	G	a	346 7285 7286 7287 K2 KW41 PA459 PsaV PsaVI
scf_12387_147_contig_1	6800	t	C	C	C	C	C	C	C	C	C	t	346 7285 7286 7287 K2 KW41 PA459 PsaV PsaVI
scf_12387_147_contig_1	690	g	A	A	A	A	A	A	A	A	A	g	346 7285 7286 7287 K2 KW41 PA459 PsaV PsaVI
scf_12387_147_contig_1	7569	c	T	T	T	T	T	T	T	T	T	c	346 7285 7286 7287 K2 KW41 PA459 PsaV PsaVI
scf_12387_147_contig_1	8529	g	A	A	A	A	A	A	A	A	A	g	346 7285 7286 7287 K2 KW41 PA459 PsaV PsaVI
scf_12387_147_contig_1	8782	c	T	T	T	T	T	T	T	T	T	c	346 7285 7286 7287 K2 KW41 PA459 PsaV PsaVI
scf_12387_147_contig_1	9448	t	C	C	C	C	C	C	C	C	C	t	346 7285 7286 7287 K2 KW41 PA459 PsaV PsaVI
scf_12387_147_contig_1	9727	a	C	C	C	C	C	C	C	C	C	a	346 7285 7286 7287 K2 KW41 PA459 PsaV PsaVI
scf_12387_147_contig_3	117	g	T	T	T	T	T	T	T	T	T	g	346 7285 7286 7287 K2 KW41 PA459 PsaV PsaVI
scf_12387_147_contig_3	3627	g	A	A	A	A	A	A	A	A	A	g	346 7285 7286 7287 K2 KW41 PA459 PsaV PsaVI
scf_12387_147_contig_3	3769	c	T	T	T	T	T	T	T	T	T	c	346 7285 7286 7287 K2 KW41 PA459 PsaV PsaVI
scf_12387_147_contig_3	4113	a	G	G	G	G	G	G	G	G	G	a	346 7285 7286 7287 K2 KW41 PA459 PsaV PsaVI
scf_12387_147_contig_3	4395	t	C	C	C	C	C	C	C	C	C	t	346 7285 7286 7287 K2 KW41 PA459 PsaV PsaVI
scf_12387_147_contig_3	5747	t	G	G	G	G	G	G	G	G	G	t	346 7285 7286 7287 K2 KW41 PA459 PsaV PsaVI
scf_12387_147_contig_3	5869	g	A	A	A	A	A	A	A	A	A	g	346 7285 7286 7287 K2 KW41 PA459 PsaV PsaVI
scf_12387_147_contig_3	6038	t	C	C	C	C	C	C	C	C	C	t	346 7285 7286 7287 K2 KW41 PA459 PsaV PsaVI
scf_12387_147_contig_3	6237	g	A	A	A	A	A	A	A	A	A	g	346 7285 7286 7287 K2 KW41 PA459 PsaV PsaVI
scf_12387_147_contig_5	223	c	A	A	A	A	A	A	A	A	A	c	346 7285 7286 7287 K2 KW41 PA459 PsaV PsaVI
scf_12387_153_contig_1	1090	c	T	T	T	T	T	T	T	T	T	c	346 7285 7286 7287 K2 KW41 PA459 PsaV PsaVI
scf_12387_153_contig_1	1108	g	A	A	A	A	A	A	A	A	A	g	346 7285 7286 7287 K2 KW41 PA459 PsaV PsaVI
scf_12387_153_contig_1	1215	g	A	A	A	A	A	A	A	A	A	g	346 7285 7286 7287 K2 KW41 PA459 PsaV PsaVI
scf_12387_153_contig_1	1242	c	T	T	T	T	T	T	T	T	T	c	346 7285 7286 7287 K2 KW41 PA459 PsaV PsaVI
scf_12387_153_contig_1	1452	c	T	T	T	T	T	T	T	T	T	c	346 7285 7286 7287 K2 KW41 PA459 PsaV PsaVI
scf_12387_153_contig_1	1485	c	T	T	T	T	T	T	T	T	T	c	346 7285 7286 7287 K2 KW41 PA459 PsaV PsaVI
scf_12387_153_contig_1	1515	c	T	T	T	T	T	T	T	T	T	c	346 7285 7286 7287 K2 KW41 PA459 PsaV PsaVI
scf_12387_153_contig_1	1631	c	A	A	A	A	A	A	A	A	A	c	346 7285 7286 7287 K2 KW41 PA459 PsaV PsaVI
scf_12387_153_contig_1	462	c	A	A	A	A	A	A	A	A	A	c	346 7285 7286 7287 K2 KW41 PA459 PsaV PsaVI
scf_12387_153_contig_1	512	g	A	A	A	A	A	A	A	A	A	g	346 7285 7286 7287 K2 KW41 PA459 PsaV PsaVI
scf_12387_153_contig_1	528	g	A	A	A	A	A	A	A	A	A	g	346 7285 7286 7287 K2 KW41 PA459 PsaV PsaVI
scf_12387_153_contig_1	699	c	T	T	T	T	T	T	T	T	T	c	346 7285 7286 7287 K2 KW41 PA459 PsaV PsaVI
scf_12387_153_contig_1	784	a	C	C	C	C	C	C	C	C	C	a	346 7285 7286 7287 K2 KW41 PA459 PsaV PsaVI
scf_12387_153_contig_1	969	g	A	A	A	A	A	A	A	A	A	g	346 7285 7286 7287 K2 KW41 PA459 PsaV PsaVI
scf_12387_153_contig_3	1001	c	T	T	T	T	T	T	T	T	T	c	346 7285 7286 7287 K2 KW41 PA459 PsaV PsaVI
scf_12387_153_contig_3	10166	g	A	A	A	A	A	A	A	A	A	g	346 7285 7286 7287 K2 KW41 PA459 PsaV PsaVI
scf_12387_153_contig_3	1154	g	A	A	A	A	A	A	A	A	A	g	346 7285 7286 7287 K2 KW41 PA459 PsaV PsaVI
scf_12387_153_contig_3	11586	g	C	C	C	C	C	C	C	C	C	g	346 7285 7286 7287 K2 KW41 PA459 PsaV PsaVI
scf_12387_153_contig_3	1189	c	A	A	A	A	A	A	A	A	A	c	346 7285 7286 7287 K2 KW41 PA459 PsaV PsaVI
scf_12387_153_contig_3	1286	g	C	C	C	C	C	C	C	C	C	g	346 7285 7286 7287 K2 KW41 PA459 PsaV PsaVI
scf_12387_153_contig_3	14146	a	G	G	G	G	G	G	G	G	G	a	346 7285 7286 7287 K2 KW41 PA459 PsaV PsaVI
scf_12387_153_contig_3	1428	c	T	T	T	T	T	T	T	T	T	c	346 7285 7286 7287 K2 KW41 PA459 PsaV PsaVI
scf_12387_153_contig_3	14486	g	A	A	A	A	A	A	A	A	A	g	346 7285 7286 7287 K2 KW41 PA459 PsaV PsaVI
scf_12387_153_contig_3	14598	g	A	A	A	A	A	A	A	A	A	g	346 7285 7286 7287 K2 KW41 PA459 PsaV PsaVI
scf_12387_153_contig_3	1466	g	A	A	A	A	A	A	A	A	A	g	346 7285 7286 7287 K2 KW41 PA459 PsaV PsaVI
scf_12387_153_contig_3	14685	g	A	A	A	A	A	A	A	A	A	g	346 7285 7286 7287 K2 KW41 PA459 PsaV PsaVI
scf_12387_153_contig_3	2145	g	A	A	A	A	A	A	A	A	A	g	346 7285 7286 7287 K2 KW41 PA459 PsaV PsaVI
scf_12387_153_contig_3	2808	g	T	T	T	T	T	T	T	T	T	g	346 7285 7286 7287 K2 KW41 PA459 PsaV PsaVI
scf_12387_153_contig_3	2909	a	G	G	G	G	G	G	G	G	G	a	346 7285 7286 7287 K2 KW41 PA459 PsaV PsaVI
scf_12387_153_contig_3	5331	t	C	C	C	C	C	C	C	C	C	t	346 7285 7286 7287 K2 KW41 PA459 PsaV PsaVI
scf_12387_153_contig_3	5484	g	T	T	T	T	T	T	T	T	T	g	346 7285 7286 7287 K2 KW41 PA459 PsaV PsaVI
scf_12387_153_contig_3	5506	g	A	A	A	A	A	A	A	A	A	g	346 7285 7286 7287 K2 KW41 PA459 PsaV PsaVI
scf_12387_153_contig_3	5511	t	C	C	C	C	C	C	C	C	C	t	346 7285 7286 7287 K2 KW41 PA459 PsaV PsaVI
scf_12387_153_contig_3	5910	g	C	C	C	C	C	C	C	C	C	g	346 7285 7286 7287 K2 KW41 PA459 PsaV PsaVI
scf_12387_153_contig_3	5970	c	T	T	T	T	T	T	T	T	T	c	346 7285 7286 7287 K2 KW41 PA459 PsaV PsaVI
scf_12387_153_contig_3	6138	g	A	A	A	A	A	A	A	A	A	g	346 7285 7286 7287 K2 KW41 PA459 PsaV PsaVI
scf_12387_153_contig_3	6159	c	A	A	A	A	A	A	A	A	A	c	346 7285 7286 7287 K2 KW41 PA459 PsaV PsaVI
scf_12387_153_contig_3	6235	c	T	T	T	T	T	T	T	T	T	c	346 7285 7286 7287 K2 KW41 PA459 PsaV PsaVI
scf_12387_153_contig_3	6300	g	A	A	A	A	A	A	A	A	A	g	346 7285 7286 7287 K2 KW41 PA459 PsaV PsaVI
scf_12387_153_contig_3	6524	c	T	T	T	T	T	T	T	T	T	c	346 7285 7286 7287 K2 KW41 PA459 PsaV PsaVI
scf_12387_153_contig_3	6558	t	C	C	C	C	C	C	C	C	C	t	346 7285 7286 7287 K2 KW41 PA459 PsaV PsaVI
scf_12387_153_contig_3	6594	a	G	G	G	G	G	G	G	G	G	a	346 7285 7286 7287 K2 KW41 PA459 PsaV PsaVI
scf_12387_153_contig_3	6600	g	T	T	T	T	T	T	T	T	T	g	346 7285 7286 7287 K2 KW41 PA459 PsaV PsaVI
scf_12387_153_contig_3	6732	t	C	C	C	C	C	C	C	C	C	t	346 7285 7286 7287 K2 KW41 PA459 PsaV PsaVI
scf_12387_153_contig_3	6735	g	A	A	A	A	A	A	A	A	A	g	346 7285 7286 7287 K2 KW41 PA459 PsaV PsaVI
scf_12387_153_contig_3	6798	c	T	T	T	T	T	T	T	T	T	c	346 7285 7286 7287 K2 KW41 PA459 PsaV PsaVI
scf_12387_153_contig_3	6846	a	G	G	G	G	G	G	G	G	G	a	346 7285 7286 7287 K2 KW41 PA459 PsaV PsaVI
scf_12387_153_contig_3	6960	a	G	G	G	G	G	G	G	G	G	a	346 7285 7286 7287 K2 KW41 PA459 PsaV PsaVI
scf_12387_153_contig_3	7059	c	T	T	T	T	T	T	T	T	T	c	346 7285 7286 7287 K2 KW41 PA459 PsaV PsaVI
scf_12387_153_contig_3	7374	a	G	G	G	G	G	G	G	G	G	a	346 7285 7286 7287 K2 KW41 PA459 PsaV PsaVI
scf_12387_153_contig_3	7416	c	A	A	A	A	A	A	A	A	A	c	346 7285 7286 7287 K2 KW41 PA459 PsaV PsaVI
scf_12387_153_contig_3	7437	t	G	G	G	G	G	G	G	G	G	t	346 7285 7286 7287 K2 KW41 PA459 PsaV PsaVI
scf_12387_153_contig_3	8630	g	A	A	A	A	A	A	A	A	A	g	346 7285 7286 7287 K2 KW41 PA459 PsaV PsaVI
scf_12387_153_contig_3	9125	a	G	G	G	G	G	G	G	G	G	a	346 7285 7286 7287 K2 KW41 PA459 PsaV PsaVI
scf_12387_153_contig_3	9308	a	G	G	G	G	G	G	G	G	G	a	346 7285 7286 7287 K2 KW41 PA459 PsaV PsaVI
scf_12387_153_contig_3	9359	g	C	C	C	C	C	C	C	C	C	g	346 7285 7286 7287 K2 KW41 PA459 PsaV PsaVI
scf_12387_153_contig_3	9647	g	A	A	A	A	A	A	A	A	A	g	346 7285 7286 7287 K2 KW41 PA459 PsaV PsaVI
scf_12387_153_contig_3	9668	t	C	C	C	C	C	C	C	C	C	t	346 7285 7286 7287 K2 KW41 PA459 PsaV PsaVI
scf_12387_153_contig_3	9725	t	C	C	C	C	C	C	C	C	C	t	346 7285 7286 7287 K2 KW41 PA459 PsaV PsaVI
scf_12387_153_contig_3	9782	a	G	G	G	G	G	G	G	G	G	a	346 7285 7286 7287 K2 KW41 PA459 PsaV PsaVI
scf_12387_153_contig_3	9854	g	A	A	A	A	A	A	A	A	A	g	346 7285 7286 7287 K2 KW41 PA459 PsaV PsaVI
scf_12387_154_contig_1	10197	a	C	C	C	C	C	C	C	C	C	a	346 7285 7286 7287 K2 KW41 PA459 PsaV PsaVI
scf_12387_154_contig_1	10269	c	T	T	T	T	T	T	T	T	T	c	346 7285 7286 7287 K2 KW41 PA459 PsaV PsaVI
scf_12387_154_contig_1	10500	c	T	T	T	T	T	T	T	T	T	c	346 7285 7286 7287 K2 KW41 PA459 PsaV PsaVI
scf_12387_154_contig_1	10642	g	T	T	T	T	T	T	T	T	T	g	346 7285 7286 7287 K2 KW41 PA459 PsaV PsaVI
scf_12387_154_contig_1	10689	a	G	G	G	G	G	G	G	G	G	a	346 7285 7286 7287 K2 KW41 PA459 PsaV PsaVI
scf_12387_154_contig_1	10918	c	G	G	G	G	G	G	G	G	G	c	346 7285 7286 7287 K2 KW41 PA459 PsaV PsaVI
scf_12387_154_contig_1	11830	t	C	C	C	C	C	C	C	C	C	t	346 7285 7286 7287 K2 KW41 PA459 PsaV PsaVI
scf_12387_154_contig_1	12166	g	C	C	C	C	C	C	C	C	C	g	346 7285 7286 7287 K2 KW41 PA459 PsaV PsaVI
scf_12387_154_contig_1	12405	c	T	T	T	T	T	T	T	T	T	c	346 7285 7286 7287 K2 KW41 PA459 PsaV PsaVI
scf_12387_154_contig_1	12584	g	A	A	A	A	A	A	A	A	A	g	346 7285 7286 7287 K2 KW41 PA459 PsaV PsaVI
scf_12387_154_contig_1	12612	c	T	T	T	T	T	T	T	T	T	c	346 7285 7286 7287 K2 KW41 PA459 PsaV PsaVI
scf_12387_154_contig_1	12628	c	T	T	T	T	T	T	T	T	T	c	346 7285 7286 7287 K2 KW41 PA459 PsaV PsaVI
scf_12387_154_contig_1	13641	c	T	T	T	T	T	T	T	T	T	c	346 7285 7286 7287 K2 KW41 PA459 PsaV PsaVI
scf_12387_154_contig_1	13771	g	A	A	A	A	A	A	A	A	A	g	346 7285 7286 7287 K2 KW41 PA459 PsaV PsaVI
scf_12387_154_contig_1	13861	a	G	G	G	G	G	G	G	G	G	a	346 7285 7286 7287 K2 KW41 PA459 PsaV PsaVI
scf_12387_154_contig_1	13878	t	C	C	C	C	C	C	C	C	C	t	346 7285 7286 7287 K2 KW41 PA459 PsaV PsaVI
scf_12387_154_contig_1	14029	g	A	A	A	A	A	A	A	A	A	g	346 7285 7286 7287 K2 KW41 PA459 PsaV PsaVI
scf_12387_154_contig_1	14197	t	G	G	G	G	G	G	G	G	G	t	346 7285 7286 7287 K2 KW41 PA459 PsaV PsaVI
scf_12387_154_contig_1	14320	c	G	G	G	G	G	G	G	G	G	c	346 7285 7286 7287 K2 KW41 PA459 PsaV PsaVI
scf_12387_154_contig_1	16391	c	T	T	T	T	T	T	T	T	T	c	346 7285 7286 7287 K2 KW41 PA459 PsaV PsaVI
scf_12387_154_contig_1	17171	t	C	C	C	C	C	C	C	C	C	t	346 7285 7286 7287 K2 KW41 PA459 PsaV PsaVI
scf_12387_154_contig_1	17735	g	A	A	A	A	A	A	A	A	A	g	346 7285 7286 7287 K2 KW41 PA459 PsaV PsaVI
scf_12387_154_contig_1	18050	c	T	T	T	T	T	T	T	T	T	c	346 7285 7286 7287 K2 KW41 PA459 PsaV PsaVI
scf_12387_154_contig_1	18617	t	C	C	C	C	C	C	C	C	C	t	346 7285 7286 7287 K2 KW41 PA459 PsaV PsaVI
scf_12387_154_contig_1	18758	g	A	A	A	A	A	A	A	A	A	g	346 7285 7286 7287 K2 KW41 PA459 PsaV PsaVI
scf_12387_154_contig_1	18994	g	A	A	A	A	A	A	A	A	A	g	346 7285 7286 7287 K2 KW41 PA459 PsaV PsaVI
scf_12387_154_contig_1	1935	a	G	G	G	G	G	G	G	G	G	a	346 7285 7286 7287 K2 KW41 PA459 PsaV PsaVI
scf_12387_154_contig_1	2013	g	A	A	A	A	A	A	A	A	A	g	346 7285 7286 7287 K2 KW41 PA459 PsaV PsaVI
scf_12387_154_contig_1	20397	t	C	C	C	C	C	C	C	C	C	t	346 7285 7286 7287 K2 KW41 PA459 PsaV PsaVI
scf_12387_154_contig_1	20463	c	T	T	T	T	T	T	T	T	T	c	346 7285 7286 7287 K2 KW41 PA459 PsaV PsaVI
scf_12387_154_contig_1	20628	t	C	C	C	C	C	C	C	C	C	t	346 7285 7286 7287 K2 KW41 PA459 PsaV PsaVI
scf_12387_154_contig_1	20685	t	C	C	C	C	C	C	C	C	C	t	346 7285 7286 7287 K2 KW41 PA459 PsaV PsaVI
scf_12387_154_contig_1	20733	c	T	T	T	T	T	T	T	T	T	c	346 7285 7286 7287 K2 KW41 PA459 PsaV PsaVI
scf_12387_154_contig_1	21498	c	G	G	G	G	G	G	G	G	G	c	346 7285 7286 7287 K2 KW41 PA459 PsaV PsaVI
scf_12387_154_contig_1	21579	a	G	G	G	G	G	G	G	G	G	a	346 7285 7286 7287 K2 KW41 PA459 PsaV PsaVI
scf_12387_154_contig_1	21717	t	C	C	C	C	C	C	C	C	C	t	346 7285 7286 7287 K2 KW41 PA459 PsaV PsaVI
scf_12387_154_contig_1	2402	g	A	A	A	A	A	A	A	A	A	g	346 7285 7286 7287 K2 KW41 PA459 PsaV PsaVI
scf_12387_154_contig_1	2766	g	T	T	T	T	T	T	T	T	T	g	346 7285 7286 7287 K2 KW41 PA459 PsaV PsaVI
scf_12387_154_contig_1	2781	g	A	A	A	A	A	A	A	A	A	g	346 7285 7286 7287 K2 KW41 PA459 PsaV PsaVI
scf_12387_154_contig_1	3391	g	A	A	A	A	A	A	A	A	A	g	346 7285 7286 7287 K2 KW41 PA459 PsaV PsaVI
scf_12387_154_contig_1	3690	g	T	T	T	T	T	T	T	T	T	g	346 7285 7286 7287 K2 KW41 PA459 PsaV PsaVI
scf_12387_154_contig_1	3819	c	G	G	G	G	G	G	G	G	G	c	346 7285 7286 7287 K2 KW41 PA459 PsaV PsaVI
scf_12387_154_contig_1	4357	c	T	T	T	T	T	T	T	T	T	c	346 7285 7286 7287 K2 KW41 PA459 PsaV PsaVI
scf_12387_154_contig_1	4359	g	A	A	A	A	A	A	A	A	A	g	346 7285 7286 7287 K2 KW41 PA459 PsaV PsaVI
scf_12387_154_contig_1	5181	t	C	C	C	C	C	C	C	C	C	t	346 7285 7286 7287 K2 KW41 PA459 PsaV PsaVI
scf_12387_154_contig_1	6663	c	T	T	T	T	T	T	T	T	T	c	346 7285 7286 7287 K2 KW41 PA459 PsaV PsaVI
scf_12387_154_contig_1	6665	c	T	T	T	T	T	T	T	T	T	c	346 7285 7286 7287 K2 KW41 PA459 PsaV PsaVI
scf_12387_154_contig_1	6903	a	G	G	G	G	G	G	G	G	G	a	346 7285 7286 7287 K2 KW41 PA459 PsaV PsaVI
scf_12387_154_contig_1	7059	g	A	A	A	A	A	A	A	A	A	g	346 7285 7286 7287 K2 KW41 PA459 PsaV PsaVI
scf_12387_154_contig_1	7092	g	A	A	A	A	A	A	A	A	A	g	346 7285 7286 7287 K2 KW41 PA459 PsaV PsaVI
scf_12387_154_contig_1	7119	g	C	C	C	C	C	C	C	C	C	g	346 7285 7286 7287 K2 KW41 PA459 PsaV PsaVI
scf_12387_154_contig_1	7233	t	C	C	C	C	C	C	C	C	C	t	346 7285 7286 7287 K2 KW41 PA459 PsaV PsaVI
scf_12387_154_contig_1	7300	c	T	T	T	T	T	T	T	T	T	c	346 7285 7286 7287 K2 KW41 PA459 PsaV PsaVI
scf_12387_154_contig_1	7324	t	C	C	C	C	C	C	C	C	C	t	346 7285 7286 7287 K2 KW41 PA459 PsaV PsaVI
scf_12387_154_contig_1	7386	c	T	T	T	T	T	T	T	T	T	c	346 7285 7286 7287 K2 KW41 PA459 PsaV PsaVI
scf_12387_154_contig_1	7551	c	T	T	T	T	T	T	T	T	T	c	346 7285 7286 7287 K2 KW41 PA459 PsaV PsaVI
scf_12387_154_contig_1	7640	c	T	T	T	T	T	T	T	T	T	c	346 7285 7286 7287 K2 KW41 PA459 PsaV PsaVI
scf_12387_154_contig_1	9045	a	T	T	T	T	T	T	T	T	T	a	346 7285 7286 7287 K2 KW41 PA459 PsaV PsaVI
scf_12387_154_contig_1	9061	g	A	A	A	A	A	A	A	A	A	g	346 7285 7286 7287 K2 KW41 PA459 PsaV PsaVI
scf_12387_154_contig_1	9161	g	A	A	A	A	A	A	A	A	A	g	346 7285 7286 7287 K2 KW41 PA459 PsaV PsaVI
scf_12387_154_contig_1	9326	a	G	G	G	G	G	G	G	G	G	a	346 7285 7286 7287 K2 KW41 PA459 PsaV PsaVI
scf_12387_154_contig_1	9491	a	T	T	T	T	T	T	T	T	T	a	346 7285 7286 7287 K2 KW41 PA459 PsaV PsaVI
scf_12387_154_contig_1	9676	c	T	T	T	T	T	T	T	T	T	c	346 7285 7286 7287 K2 KW41 PA459 PsaV PsaVI
scf_12387_154_contig_1	9725	c	T	T	T	T	T	T	T	T	T	c	346 7285 7286 7287 K2 KW41 PA459 PsaV PsaVI
scf_12387_154_contig_3	1116	g	A	A	A	A	A	A	A	A	A	g	346 7285 7286 7287 K2 KW41 PA459 PsaV PsaVI
scf_12387_154_contig_3	1209	t	C	C	C	C	C	C	C	C	C	t	346 7285 7286 7287 K2 KW41 PA459 PsaV PsaVI
scf_12387_154_contig_3	1401	t	C	C	C	C	C	C	C	C	C	t	346 7285 7286 7287 K2 KW41 PA459 PsaV PsaVI
scf_12387_154_contig_3	1410	c	T	T	T	T	T	T	T	T	T	c	346 7285 7286 7287 K2 KW41 PA459 PsaV PsaVI
scf_12387_154_contig_3	1584	c	T	T	T	T	T	T	T	T	T	c	346 7285 7286 7287 K2 KW41 PA459 PsaV PsaVI
scf_12387_154_contig_3	1656	g	T	T	T	T	T	T	T	T	T	g	346 7285 7286 7287 K2 KW41 PA459 PsaV PsaVI
scf_12387_154_contig_3	1809	c	T	T	T	T	T	T	T	T	T	c	346 7285 7286 7287 K2 KW41 PA459 PsaV PsaVI
scf_12387_154_contig_3	1872	a	G	G	G	G	G	G	G	G	G	a	346 7285 7286 7287 K2 KW41 PA459 PsaV PsaVI
scf_12387_154_contig_3	1902	c	T	T	T	T	T	T	T	T	T	c	346 7285 7286 7287 K2 KW41 PA459 PsaV PsaVI
scf_12387_154_contig_3	2037	c	T	T	T	T	T	T	T	T	T	c	346 7285 7286 7287 K2 KW41 PA459 PsaV PsaVI
scf_12387_154_contig_3	2383	t	C	C	C	C	C	C	C	C	C	t	346 7285 7286 7287 K2 KW41 PA459 PsaV PsaVI
scf_12387_154_contig_3	467	g	A	A	A	A	A	A	A	A	A	g	346 7285 7286 7287 K2 KW41 PA459 PsaV PsaVI
scf_12387_154_contig_3	488	c	T	T	T	T	T	T	T	T	T	c	346 7285 7286 7287 K2 KW41 PA459 PsaV PsaVI
scf_12387_154_contig_3	5255	c	T	T	T	T	T	T	T	T	T	c	346 7285 7286 7287 K2 KW41 PA459 PsaV PsaVI
scf_12387_154_contig_3	5636	a	C	C	C	C	C	C	C	C	C	a	346 7285 7286 7287 K2 KW41 PA459 PsaV PsaVI
scf_12387_154_contig_3	5702	c	T	T	T	T	T	T	T	T	T	c	346 7285 7286 7287 K2 KW41 PA459 PsaV PsaVI
scf_12387_154_contig_3	573	g	A	A	A	A	A	A	A	A	A	g	346 7285 7286 7287 K2 KW41 PA459 PsaV PsaVI
scf_12387_154_contig_3	5759	c	T	T	T	T	T	T	T	T	T	c	346 7285 7286 7287 K2 KW41 PA459 PsaV PsaVI
scf_12387_154_contig_3	590	g	A	A	A	A	A	A	A	A	A	g	346 7285 7286 7287 K2 KW41 PA459 PsaV PsaVI
scf_12387_154_contig_3	614	g	A	A	A	A	A	A	A	A	A	g	346 7285 7286 7287 K2 KW41 PA459 PsaV PsaVI
scf_12387_154_contig_3	626	t	C	C	C	C	C	C	C	C	C	t	346 7285 7286 7287 K2 KW41 PA459 PsaV PsaVI
scf_12387_154_contig_3	746	g	A	A	A	A	A	A	A	A	A	g	346 7285 7286 7287 K2 KW41 PA459 PsaV PsaVI
scf_12387_154_contig_3	789	g	A	A	A	A	A	A	A	A	A	g	346 7285 7286 7287 K2 KW41 PA459 PsaV PsaVI
scf_12387_154_contig_5	503	g	A	A	A	A	A	A	A	A	A	g	346 7285 7286 7287 K2 KW41 PA459 PsaV PsaVI
scf_12387_154_contig_5	528	c	T	T	T	T	T	T	T	T	T	c	346 7285 7286 7287 K2 KW41 PA459 PsaV PsaVI
scf_12387_154_contig_5	587	c	T	T	T	T	T	T	T	T	T	c	346 7285 7286 7287 K2 KW41 PA459 PsaV PsaVI
scf_12387_15_contig_1	10017	g	A	A	A	A	A	A	A	A	A	g	346 7285 7286 7287 K2 KW41 PA459 PsaV PsaVI
scf_12387_15_contig_1	10084	a	G	G	G	G	G	G	G	G	G	a	346 7285 7286 7287 K2 KW41 PA459 PsaV PsaVI
scf_12387_15_contig_1	10275	c	T	T	T	T	T	T	T	T	T	c	346 7285 7286 7287 K2 KW41 PA459 PsaV PsaVI
scf_12387_15_contig_1	10334	g	A	A	A	A	A	A	A	A	A	g	346 7285 7286 7287 K2 KW41 PA459 PsaV PsaVI
scf_12387_15_contig_1	10419	g	A	A	A	A	A	A	A	A	A	g	346 7285 7286 7287 K2 KW41 PA459 PsaV PsaVI
scf_12387_15_contig_1	10448	t	C	C	C	C	C	C	C	C	C	t	346 7285 7286 7287 K2 KW41 PA459 PsaV PsaVI
scf_12387_15_contig_1	10515	c	G	G	G	G	G	G	G	G	G	c	346 7285 7286 7287 K2 KW41 PA459 PsaV PsaVI
scf_12387_15_contig_1	10761	c	T	T	T	T	T	T	T	T	T	c	346 7285 7286 7287 K2 KW41 PA459 PsaV PsaVI
scf_12387_15_contig_1	10785	c	T	T	T	T	T	T	T	T	T	c	346 7285 7286 7287 K2 KW41 PA459 PsaV PsaVI
scf_12387_15_contig_1	10788	c	G	G	G	G	G	G	G	G	G	c	346 7285 7286 7287 K2 KW41 PA459 PsaV PsaVI
scf_12387_15_contig_1	10854	c	G	G	G	G	G	G	G	G	G	c	346 7285 7286 7287 K2 KW41 PA459 PsaV PsaVI
scf_12387_15_contig_1	10962	a	G	G	G	G	G	G	G	G	G	a	346 7285 7286 7287 K2 KW41 PA459 PsaV PsaVI
scf_12387_15_contig_1	11058	t	C	C	C	C	C	C	C	C	C	t	346 7285 7286 7287 K2 KW41 PA459 PsaV PsaVI
scf_12387_15_contig_1	11465	g	A	A	A	A	A	A	A	A	A	g	346 7285 7286 7287 K2 KW41 PA459 PsaV PsaVI
scf_12387_15_contig_1	11472	a	G	G	G	G	G	G	G	G	G	a	346 7285 7286 7287 K2 KW41 PA459 PsaV PsaVI
scf_12387_15_contig_1	5220	t	G	G	G	G	G	G	G	G	G	t	346 7285 7286 7287 K2 KW41 PA459 PsaV PsaVI
scf_12387_15_contig_1	6027	c	T	T	T	T	T	T	T	T	T	c	346 7285 7286 7287 K2 KW41 PA459 PsaV PsaVI
scf_12387_15_contig_1	6055	a	C	C	C	C	C	C	C	C	C	a	346 7285 7286 7287 K2 KW41 PA459 PsaV PsaVI
scf_12387_15_contig_1	6827	c	T	T	T	T	T	T	T	T	T	c	346 7285 7286 7287 K2 KW41 PA459 PsaV PsaVI
scf_12387_15_contig_1	7309	g	T	T	T	T	T	T	T	T	T	g	346 7285 7286 7287 K2 KW41 PA459 PsaV PsaVI
scf_12387_15_contig_1	7331	t	C	C	C	C	C	C	C	C	C	t	346 7285 7286 7287 K2 KW41 PA459 PsaV PsaVI
scf_12387_15_contig_1	7374	g	A	A	A	A	A	A	A	A	A	g	346 7285 7286 7287 K2 KW41 PA459 PsaV PsaVI
scf_12387_15_contig_1	7404	g	T	T	T	T	T	T	T	T	T	g	346 7285 7286 7287 K2 KW41 PA459 PsaV PsaVI
scf_12387_15_contig_1	7412	t	A	A	A	A	A	A	A	A	A	t	346 7285 7286 7287 K2 KW41 PA459 PsaV PsaVI
scf_12387_15_contig_1	7431	g	T	T	T	T	T	T	T	T	T	g	346 7285 7286 7287 K2 KW41 PA459 PsaV PsaVI
scf_12387_15_contig_1	7613	t	A	A	A	A	A	A	A	A	A	t	346 7285 7286 7287 K2 KW41 PA459 PsaV PsaVI
scf_12387_15_contig_1	7784	t	C	C	C	C	C	C	C	C	C	t	346 7285 7286 7287 K2 KW41 PA459 PsaV PsaVI
scf_12387_15_contig_1	8328	a	G	G	G	G	G	G	G	G	G	a	346 7285 7286 7287 K2 KW41 PA459 PsaV PsaVI
scf_12387_15_contig_1	8375	a	C	C	C	C	C	C	C	C	C	a	346 7285 7286 7287 K2 KW41 PA459 PsaV PsaVI
scf_12387_15_contig_1	8527	t	C	C	C	C	C	C	C	C	C	t	346 7285 7286 7287 K2 KW41 PA459 PsaV PsaVI
scf_12387_15_contig_1	8770	g	C	C	C	C	C	C	C	C	C	g	346 7285 7286 7287 K2 KW41 PA459 PsaV PsaVI
scf_12387_15_contig_1	9072	t	G	G	G	G	G	G	G	G	G	t	346 7285 7286 7287 K2 KW41 PA459 PsaV PsaVI
scf_12387_15_contig_1	9189	g	T	T	T	T	T	T	T	T	T	g	346 7285 7286 7287 K2 KW41 PA459 PsaV PsaVI
scf_12387_15_contig_1	9229	c	T	T	T	T	T	T	T	T	T	c	346 7285 7286 7287 K2 KW41 PA459 PsaV PsaVI
scf_12387_15_contig_1	9528	c	T	T	T	T	T	T	T	T	T	c	346 7285 7286 7287 K2 KW41 PA459 PsaV PsaVI
scf_12387_15_contig_1	9873	t	C	C	C	C	C	C	C	C	C	t	346 7285 7286 7287 K2 KW41 PA459 PsaV PsaVI
scf_12387_162_contig_1	1071	c	T	T	T	T	T	T	T	T	T	c	346 7285 7286 7287 K2 KW41 PA459 PsaV PsaVI
scf_12387_162_contig_1	1764	g	A	A	A	A	A	A	A	A	A	g	346 7285 7286 7287 K2 KW41 PA459 PsaV PsaVI
scf_12387_162_contig_1	1765	t	C	C	C	C	C	C	C	C	C	t	346 7285 7286 7287 K2 KW41 PA459 PsaV PsaVI
scf_12387_162_contig_1	408	c	G	G	G	G	G	G	G	G	G	c	346 7285 7286 7287 K2 KW41 PA459 PsaV PsaVI
scf_12387_162_contig_1	474	a	G	G	G	G	G	G	G	G	G	a	346 7285 7286 7287 K2 KW41 PA459 PsaV PsaVI
scf_12387_162_contig_1	493	c	T	T	T	T	T	T	T	T	T	c	346 7285 7286 7287 K2 KW41 PA459 PsaV PsaVI
scf_12387_162_contig_1	537	c	T	T	T	T	T	T	T	T	T	c	346 7285 7286 7287 K2 KW41 PA459 PsaV PsaVI
scf_12387_162_contig_1	946	c	T	T	T	T	T	T	T	T	T	c	346 7285 7286 7287 K2 KW41 PA459 PsaV PsaVI
scf_12387_162_contig_3	116	t	C	C	C	C	C	C	C	C	C	t	346 7285 7286 7287 K2 KW41 PA459 PsaV PsaVI
scf_12387_162_contig_3	152	t	C	C	C	C	C	C	C	C	C	t	346 7285 7286 7287 K2 KW41 PA459 PsaV PsaVI
scf_12387_162_contig_3	271	t	C	C	C	C	C	C	C	C	C	t	346 7285 7286 7287 K2 KW41 PA459 PsaV PsaVI
scf_12387_162_contig_3	301	t	C	C	C	C	C	C	C	C	C	t	346 7285 7286 7287 K2 KW41 PA459 PsaV PsaVI
scf_12387_162_contig_3	427	g	T	T	T	T	T	T	T	T	T	g	346 7285 7286 7287 K2 KW41 PA459 PsaV PsaVI
scf_12387_162_contig_3	445	c	T	T	T	T	T	T	T	T	T	c	346 7285 7286 7287 K2 KW41 PA459 PsaV PsaVI
scf_12387_163_contig_1	1012	g	A	A	A	A	A	A	A	A	A	g	346 7285 7286 7287 K2 KW41 PA459 PsaV PsaVI
scf_12387_163_contig_1	1171	c	T	T	T	T	T	T	T	T	T	c	346 7285 7286 7287 K2 KW41 PA459 PsaV PsaVI
scf_12387_163_contig_1	1645	a	G	G	G	G	G	G	G	G	G	a	346 7285 7286 7287 K2 KW41 PA459 PsaV PsaVI
scf_12387_163_contig_1	1873	t	A	A	A	A	A	A	A	A	A	t	346 7285 7286 7287 K2 KW41 PA459 PsaV PsaVI
scf_12387_163_contig_1	1904	a	G	G	G	G	G	G	G	G	G	a	346 7285 7286 7287 K2 KW41 PA459 PsaV PsaVI
scf_12387_163_contig_1	1931	c	A	A	A	A	A	A	A	A	A	c	346 7285 7286 7287 K2 KW41 PA459 PsaV PsaVI
scf_12387_163_contig_1	2516	t	C	C	C	C	C	C	C	C	C	t	346 7285 7286 7287 K2 KW41 PA459 PsaV PsaVI
scf_12387_163_contig_1	2813	a	G	G	G	G	G	G	G	G	G	a	346 7285 7286 7287 K2 KW41 PA459 PsaV PsaVI
scf_12387_163_contig_1	2945	g	T	T	T	T	T	T	T	T	T	g	346 7285 7286 7287 K2 KW41 PA459 PsaV PsaVI
scf_12387_163_contig_3	11272	c	G	G	G	G	G	G	G	G	G	c	346 7285 7286 7287 K2 KW41 PA459 PsaV PsaVI
scf_12387_163_contig_3	1149	g	T	T	T	T	T	T	T	T	T	g	346 7285 7286 7287 K2 KW41 PA459 PsaV PsaVI
scf_12387_163_contig_3	11507	t	C	C	C	C	C	C	C	C	C	t	346 7285 7286 7287 K2 KW41 PA459 PsaV PsaVI
scf_12387_163_contig_3	11614	g	T	T	T	T	T	T	T	T	T	g	346 7285 7286 7287 K2 KW41 PA459 PsaV PsaVI
scf_12387_163_contig_3	12434	g	T	T	T	T	T	T	T	T	T	g	346 7285 7286 7287 K2 KW41 PA459 PsaV PsaVI
scf_12387_163_contig_3	12604	a	C	C	C	C	C	C	C	C	C	a	346 7285 7286 7287 K2 KW41 PA459 PsaV PsaVI
scf_12387_163_contig_3	12613	g	A	A	A	A	A	A	A	A	A	g	346 7285 7286 7287 K2 KW41 PA459 PsaV PsaVI
scf_12387_163_contig_3	12667	c	T	T	T	T	T	T	T	T	T	c	346 7285 7286 7287 K2 KW41 PA459 PsaV PsaVI
scf_12387_163_contig_3	13207	t	C	C	C	C	C	C	C	C	C	t	346 7285 7286 7287 K2 KW41 PA459 PsaV PsaVI
scf_12387_163_contig_3	13231	a	G	G	G	G	G	G	G	G	G	a	346 7285 7286 7287 K2 KW41 PA459 PsaV PsaVI
scf_12387_163_contig_3	13471	c	A	A	A	A	A	A	A	A	A	c	346 7285 7286 7287 K2 KW41 PA459 PsaV PsaVI
scf_12387_163_contig_3	14118	a	C	C	C	C	C	C	C	C	C	a	346 7285 7286 7287 K2 KW41 PA459 PsaV PsaVI
scf_12387_163_contig_3	14313	c	T	T	T	T	T	T	T	T	T	c	346 7285 7286 7287 K2 KW41 PA459 PsaV PsaVI
scf_12387_163_contig_3	14439	c	T	T	T	T	T	T	T	T	T	c	346 7285 7286 7287 K2 KW41 PA459 PsaV PsaVI
scf_12387_163_contig_3	14514	c	T	T	T	T	T	T	T	T	T	c	346 7285 7286 7287 K2 KW41 PA459 PsaV PsaVI
scf_12387_163_contig_3	14646	c	G	G	G	G	G	G	G	G	G	c	346 7285 7286 7287 K2 KW41 PA459 PsaV PsaVI
scf_12387_163_contig_3	14760	c	T	T	T	T	T	T	T	T	T	c	346 7285 7286 7287 K2 KW41 PA459 PsaV PsaVI
scf_12387_163_contig_3	14859	g	A	A	A	A	A	A	A	A	A	g	346 7285 7286 7287 K2 KW41 PA459 PsaV PsaVI
scf_12387_163_contig_3	14988	c	T	T	T	T	T	T	T	T	T	c	346 7285 7286 7287 K2 KW41 PA459 PsaV PsaVI
scf_12387_163_contig_3	15051	t	C	C	C	C	C	C	C	C	C	t	346 7285 7286 7287 K2 KW41 PA459 PsaV PsaVI
scf_12387_163_contig_3	15144	g	A	A	A	A	A	A	A	A	A	g	346 7285 7286 7287 K2 KW41 PA459 PsaV PsaVI
scf_12387_163_contig_3	15273	c	T	T	T	T	T	T	T	T	T	c	346 7285 7286 7287 K2 KW41 PA459 PsaV PsaVI
scf_12387_163_contig_3	15285	c	T	T	T	T	T	T	T	T	T	c	346 7285 7286 7287 K2 KW41 PA459 PsaV PsaVI
scf_12387_163_contig_3	15382	g	A	A	A	A	A	A	A	A	A	g	346 7285 7286 7287 K2 KW41 PA459 PsaV PsaVI
scf_12387_163_contig_3	15441	g	A	A	A	A	A	A	A	A	A	g	346 7285 7286 7287 K2 KW41 PA459 PsaV PsaVI
scf_12387_163_contig_3	15477	g	A	A	A	A	A	A	A	A	A	g	346 7285 7286 7287 K2 KW41 PA459 PsaV PsaVI
scf_12387_163_contig_3	15510	t	C	C	C	C	C	C	C	C	C	t	346 7285 7286 7287 K2 KW41 PA459 PsaV PsaVI
scf_12387_163_contig_3	15645	g	A	A	A	A	A	A	A	A	A	g	346 7285 7286 7287 K2 KW41 PA459 PsaV PsaVI
scf_12387_163_contig_3	15646	c	T	T	T	T	T	T	T	T	T	c	346 7285 7286 7287 K2 KW41 PA459 PsaV PsaVI
scf_12387_163_contig_3	15834	g	A	A	A	A	A	A	A	A	A	g	346 7285 7286 7287 K2 KW41 PA459 PsaV PsaVI
scf_12387_163_contig_3	15998	t	C	C	C	C	C	C	C	C	C	t	346 7285 7286 7287 K2 KW41 PA459 PsaV PsaVI
scf_12387_163_contig_3	16612	c	T	T	T	T	T	T	T	T	T	c	346 7285 7286 7287 K2 KW41 PA459 PsaV PsaVI
scf_12387_163_contig_3	1687	t	G	G	G	G	G	G	G	G	G	t	346 7285 7286 7287 K2 KW41 PA459 PsaV PsaVI
scf_12387_163_contig_3	1855	t	C	C	C	C	C	C	C	C	C	t	346 7285 7286 7287 K2 KW41 PA459 PsaV PsaVI
scf_12387_163_contig_3	1858	t	C	C	C	C	C	C	C	C	C	t	346 7285 7286 7287 K2 KW41 PA459 PsaV PsaVI
scf_12387_163_contig_3	18895	g	A	A	A	A	A	A	A	A	A	g	346 7285 7286 7287 K2 KW41 PA459 PsaV PsaVI
scf_12387_163_contig_3	1963	t	C	C	C	C	C	C	C	C	C	t	346 7285 7286 7287 K2 KW41 PA459 PsaV PsaVI
scf_12387_163_contig_3	2020	a	C	C	C	C	C	C	C	C	C	a	346 7285 7286 7287 K2 KW41 PA459 PsaV PsaVI
scf_12387_163_contig_3	2032	c	T	T	T	T	T	T	T	T	T	c	346 7285 7286 7287 K2 KW41 PA459 PsaV PsaVI
scf_12387_163_contig_3	2074	c	A	A	A	A	A	A	A	A	A	c	346 7285 7286 7287 K2 KW41 PA459 PsaV PsaVI
scf_12387_163_contig_3	2089	c	T	T	T	T	T	T	T	T	T	c	346 7285 7286 7287 K2 KW41 PA459 PsaV PsaVI
scf_12387_163_contig_3	2212	g	A	A	A	A	A	A	A	A	A	g	346 7285 7286 7287 K2 KW41 PA459 PsaV PsaVI
scf_12387_163_contig_3	2227	t	C	C	C	C	C	C	C	C	C	t	346 7285 7286 7287 K2 KW41 PA459 PsaV PsaVI
scf_12387_163_contig_3	22687	g	A	A	A	A	A	A	A	A	A	g	346 7285 7286 7287 K2 KW41 PA459 PsaV PsaVI
scf_12387_163_contig_3	22984	t	G	G	G	G	G	G	G	G	G	t	346 7285 7286 7287 K2 KW41 PA459 PsaV PsaVI
scf_12387_163_contig_3	23635	g	A	A	A	A	A	A	A	A	A	g	346 7285 7286 7287 K2 KW41 PA459 PsaV PsaVI
scf_12387_163_contig_3	23833	a	G	G	G	G	G	G	G	G	G	a	346 7285 7286 7287 K2 KW41 PA459 PsaV PsaVI
scf_12387_163_contig_3	23924	c	G	G	G	G	G	G	G	G	G	c	346 7285 7286 7287 K2 KW41 PA459 PsaV PsaVI
scf_12387_163_contig_3	23989	c	T	T	T	T	T	T	T	T	T	c	346 7285 7286 7287 K2 KW41 PA459 PsaV PsaVI
scf_12387_163_contig_3	23998	g	A	A	A	A	A	A	A	A	A	g	346 7285 7286 7287 K2 KW41 PA459 PsaV PsaVI
scf_12387_163_contig_3	24048	g	A	A	A	A	A	A	A	A	A	g	346 7285 7286 7287 K2 KW41 PA459 PsaV PsaVI
scf_12387_163_contig_3	24202	g	A	A	A	A	A	A	A	A	A	g	346 7285 7286 7287 K2 KW41 PA459 PsaV PsaVI
scf_12387_163_contig_3	24406	t	C	C	C	C	C	C	C	C	C	t	346 7285 7286 7287 K2 KW41 PA459 PsaV PsaVI
scf_12387_163_contig_3	2446	c	T	T	T	T	T	T	T	T	T	c	346 7285 7286 7287 K2 KW41 PA459 PsaV PsaVI
scf_12387_163_contig_3	24580	t	C	C	C	C	C	C	C	C	C	t	346 7285 7286 7287 K2 KW41 PA459 PsaV PsaVI
scf_12387_163_contig_3	24661	c	T	T	T	T	T	T	T	T	T	c	346 7285 7286 7287 K2 KW41 PA459 PsaV PsaVI
scf_12387_163_contig_3	24720	g	A	A	A	A	A	A	A	A	A	g	346 7285 7286 7287 K2 KW41 PA459 PsaV PsaVI
scf_12387_163_contig_3	27098	c	A	A	A	A	A	A	A	A	A	c	346 7285 7286 7287 K2 KW41 PA459 PsaV PsaVI
scf_12387_163_contig_3	2722	c	T	T	T	T	T	T	T	T	T	c	346 7285 7286 7287 K2 KW41 PA459 PsaV PsaVI
scf_12387_163_contig_3	2740	g	A	A	A	A	A	A	A	A	A	g	346 7285 7286 7287 K2 KW41 PA459 PsaV PsaVI
scf_12387_163_contig_3	2746	c	T	T	T	T	T	T	T	T	T	c	346 7285 7286 7287 K2 KW41 PA459 PsaV PsaVI
scf_12387_163_contig_3	3013	t	A	A	A	A	A	A	A	A	A	t	346 7285 7286 7287 K2 KW41 PA459 PsaV PsaVI
scf_12387_163_contig_3	3238	c	T	T	T	T	T	T	T	T	T	c	346 7285 7286 7287 K2 KW41 PA459 PsaV PsaVI
scf_12387_163_contig_3	3283	g	A	A	A	A	A	A	A	A	A	g	346 7285 7286 7287 K2 KW41 PA459 PsaV PsaVI
scf_12387_163_contig_3	3292	g	A	A	A	A	A	A	A	A	A	g	346 7285 7286 7287 K2 KW41 PA459 PsaV PsaVI
scf_12387_163_contig_3	3371	a	C	C	C	C	C	C	C	C	C	a	346 7285 7286 7287 K2 KW41 PA459 PsaV PsaVI
scf_12387_163_contig_3	3832	c	T	T	T	T	T	T	T	T	T	c	346 7285 7286 7287 K2 KW41 PA459 PsaV PsaVI
scf_12387_163_contig_3	3961	c	T	T	T	T	T	T	T	T	T	c	346 7285 7286 7287 K2 KW41 PA459 PsaV PsaVI
scf_12387_163_contig_3	4030	a	G	G	G	G	G	G	G	G	G	a	346 7285 7286 7287 K2 KW41 PA459 PsaV PsaVI
scf_12387_163_contig_3	4099	a	G	G	G	G	G	G	G	G	G	a	346 7285 7286 7287 K2 KW41 PA459 PsaV PsaVI
scf_12387_163_contig_3	4253	c	T	T	T	T	T	T	T	T	T	c	346 7285 7286 7287 K2 KW41 PA459 PsaV PsaVI
scf_12387_163_contig_3	4466	c	T	T	T	T	T	T	T	T	T	c	346 7285 7286 7287 K2 KW41 PA459 PsaV PsaVI
scf_12387_163_contig_3	4504	c	G	G	G	G	G	G	G	G	G	c	346 7285 7286 7287 K2 KW41 PA459 PsaV PsaVI
scf_12387_163_contig_3	4531	g	C	C	C	C	C	C	C	C	C	g	346 7285 7286 7287 K2 KW41 PA459 PsaV PsaVI
scf_12387_163_contig_3	4675	g	T	T	T	T	T	T	T	T	T	g	346 7285 7286 7287 K2 KW41 PA459 PsaV PsaVI
scf_12387_163_contig_3	4867	c	T	T	T	T	T	T	T	T	T	c	346 7285 7286 7287 K2 KW41 PA459 PsaV PsaVI
scf_12387_163_contig_3	5077	g	C	C	C	C	C	C	C	C	C	g	346 7285 7286 7287 K2 KW41 PA459 PsaV PsaVI
scf_12387_163_contig_3	5105	g	A	A	A	A	A	A	A	A	A	g	346 7285 7286 7287 K2 KW41 PA459 PsaV PsaVI
scf_12387_163_contig_3	5485	g	A	A	A	A	A	A	A	A	A	g	346 7285 7286 7287 K2 KW41 PA459 PsaV PsaVI
scf_12387_163_contig_3	5614	c	T	T	T	T	T	T	T	T	T	c	346 7285 7286 7287 K2 KW41 PA459 PsaV PsaVI
scf_12387_163_contig_3	5657	g	C	C	C	C	C	C	C	C	C	g	346 7285 7286 7287 K2 KW41 PA459 PsaV PsaVI
scf_12387_163_contig_3	5737	g	A	A	A	A	A	A	A	A	A	g	346 7285 7286 7287 K2 KW41 PA459 PsaV PsaVI
scf_12387_163_contig_3	6516	c	G	G	G	G	G	G	G	G	G	c	346 7285 7286 7287 K2 KW41 PA459 PsaV PsaVI
scf_12387_163_contig_3	7300	t	C	C	C	C	C	C	C	C	C	t	346 7285 7286 7287 K2 KW41 PA459 PsaV PsaVI
scf_12387_163_contig_3	8515	c	A	A	A	A	A	A	A	A	A	c	346 7285 7286 7287 K2 KW41 PA459 PsaV PsaVI
scf_12387_163_contig_5	10130	a	G	G	G	G	G	G	G	G	G	a	346 7285 7286 7287 K2 KW41 PA459 PsaV PsaVI
scf_12387_163_contig_5	10782	a	G	G	G	G	G	G	G	G	G	a	346 7285 7286 7287 K2 KW41 PA459 PsaV PsaVI
scf_12387_163_contig_5	10855	c	A	A	A	A	A	A	A	A	A	c	346 7285 7286 7287 K2 KW41 PA459 PsaV PsaVI
scf_12387_163_contig_5	10957	a	T	T	T	T	T	T	T	T	T	a	346 7285 7286 7287 K2 KW41 PA459 PsaV PsaVI
scf_12387_163_contig_5	11335	g	A	A	A	A	A	A	A	A	A	g	346 7285 7286 7287 K2 KW41 PA459 PsaV PsaVI
scf_12387_163_contig_5	11406	c	T	T	T	T	T	T	T	T	T	c	346 7285 7286 7287 K2 KW41 PA459 PsaV PsaVI
scf_12387_163_contig_5	11475	g	T	T	T	T	T	T	T	T	T	g	346 7285 7286 7287 K2 KW41 PA459 PsaV PsaVI
scf_12387_163_contig_5	11538	a	C	C	C	C	C	C	C	C	C	a	346 7285 7286 7287 K2 KW41 PA459 PsaV PsaVI
scf_12387_163_contig_5	11616	g	A	A	A	A	A	A	A	A	A	g	346 7285 7286 7287 K2 KW41 PA459 PsaV PsaVI
scf_12387_163_contig_5	11632	g	T	T	T	T	T	T	T	T	T	g	346 7285 7286 7287 K2 KW41 PA459 PsaV PsaVI
scf_12387_163_contig_5	1421	a	G	G	G	G	G	G	G	G	G	a	346 7285 7286 7287 K2 KW41 PA459 PsaV PsaVI
scf_12387_163_contig_5	2375	c	G	G	G	G	G	G	G	G	G	c	346 7285 7286 7287 K2 KW41 PA459 PsaV PsaVI
scf_12387_163_contig_5	2388	a	C	C	C	C	C	C	C	C	C	a	346 7285 7286 7287 K2 KW41 PA459 PsaV PsaVI
scf_12387_163_contig_5	2417	t	C	C	C	C	C	C	C	C	C	t	346 7285 7286 7287 K2 KW41 PA459 PsaV PsaVI
scf_12387_163_contig_5	7792	a	T	T	T	T	T	T	T	T	T	a	346 7285 7286 7287 K2 KW41 PA459 PsaV PsaVI
scf_12387_163_contig_5	8298	c	T	T	T	T	T	T	T	T	T	c	346 7285 7286 7287 K2 KW41 PA459 PsaV PsaVI
scf_12387_163_contig_5	8373	a	C	C	C	C	C	C	C	C	C	a	346 7285 7286 7287 K2 KW41 PA459 PsaV PsaVI
scf_12387_163_contig_5	8460	a	C	C	C	C	C	C	C	C	C	a	346 7285 7286 7287 K2 KW41 PA459 PsaV PsaVI
scf_12387_163_contig_5	9009	c	G	G	G	G	G	G	G	G	G	c	346 7285 7286 7287 K2 KW41 PA459 PsaV PsaVI
scf_12387_163_contig_5	9140	a	G	G	G	G	G	G	G	G	G	a	346 7285 7286 7287 K2 KW41 PA459 PsaV PsaVI
scf_12387_163_contig_7	475	c	T	T	T	T	T	T	T	T	T	c	346 7285 7286 7287 K2 KW41 PA459 PsaV PsaVI
scf_12387_163_contig_7	484	c	T	T	T	T	T	T	T	T	T	c	346 7285 7286 7287 K2 KW41 PA459 PsaV PsaVI
scf_12387_163_contig_7	574	g	A	A	A	A	A	A	A	A	A	g	346 7285 7286 7287 K2 KW41 PA459 PsaV PsaVI
scf_12387_163_contig_7	586	c	T	T	T	T	T	T	T	T	T	c	346 7285 7286 7287 K2 KW41 PA459 PsaV PsaVI
scf_12387_176_contig_1	1231	t	C	C	C	C	C	C	C	C	C	t	346 7285 7286 7287 K2 KW41 PA459 PsaV PsaVI
scf_12387_176_contig_1	2967	a	C	C	C	C	C	C	C	C	C	a	346 7285 7286 7287 K2 KW41 PA459 PsaV PsaVI
scf_12387_176_contig_1	5693	t	C	C	C	C	C	C	C	C	C	t	346 7285 7286 7287 K2 KW41 PA459 PsaV PsaVI
scf_12387_176_contig_5	10097	a	G	G	G	G	G	G	G	G	G	a	346 7285 7286 7287 K2 KW41 PA459 PsaV PsaVI
scf_12387_176_contig_5	10307	c	A	A	A	A	A	A	A	A	A	c	346 7285 7286 7287 K2 KW41 PA459 PsaV PsaVI
scf_12387_176_contig_5	11528	c	T	T	T	T	T	T	T	T	T	c	346 7285 7286 7287 K2 KW41 PA459 PsaV PsaVI
scf_12387_176_contig_5	11715	t	C	C	C	C	C	C	C	C	C	t	346 7285 7286 7287 K2 KW41 PA459 PsaV PsaVI
scf_12387_176_contig_5	11762	c	T	T	T	T	T	T	T	T	T	c	346 7285 7286 7287 K2 KW41 PA459 PsaV PsaVI
scf_12387_176_contig_5	11843	t	C	C	C	C	C	C	C	C	C	t	346 7285 7286 7287 K2 KW41 PA459 PsaV PsaVI
scf_12387_176_contig_5	11882	a	G	G	G	G	G	G	G	G	G	a	346 7285 7286 7287 K2 KW41 PA459 PsaV PsaVI
scf_12387_176_contig_5	11927	g	A	A	A	A	A	A	A	A	A	g	346 7285 7286 7287 K2 KW41 PA459 PsaV PsaVI
scf_12387_176_contig_5	11930	t	C	C	C	C	C	C	C	C	C	t	346 7285 7286 7287 K2 KW41 PA459 PsaV PsaVI
scf_12387_176_contig_5	13701	c	T	T	T	T	T	T	T	T	T	c	346 7285 7286 7287 K2 KW41 PA459 PsaV PsaVI
scf_12387_176_contig_5	17310	a	T	T	T	T	T	T	T	T	T	a	346 7285 7286 7287 K2 KW41 PA459 PsaV PsaVI
scf_12387_176_contig_5	19610	c	T	T	T	T	T	T	T	T	T	c	346 7285 7286 7287 K2 KW41 PA459 PsaV PsaVI
scf_12387_176_contig_5	19730	a	G	G	G	G	G	G	G	G	G	a	346 7285 7286 7287 K2 KW41 PA459 PsaV PsaVI
scf_12387_176_contig_5	20122	g	A	A	A	A	A	A	A	A	A	g	346 7285 7286 7287 K2 KW41 PA459 PsaV PsaVI
scf_12387_176_contig_5	20215	t	C	C	C	C	C	C	C	C	C	t	346 7285 7286 7287 K2 KW41 PA459 PsaV PsaVI
scf_12387_176_contig_5	20218	c	T	T	T	T	T	T	T	T	T	c	346 7285 7286 7287 K2 KW41 PA459 PsaV PsaVI
scf_12387_176_contig_5	20887	g	A	A	A	A	A	A	A	A	A	g	346 7285 7286 7287 K2 KW41 PA459 PsaV PsaVI
scf_12387_176_contig_5	21907	a	C	C	C	C	C	C	C	C	C	a	346 7285 7286 7287 K2 KW41 PA459 PsaV PsaVI
scf_12387_176_contig_5	22021	g	A	A	A	A	A	A	A	A	A	g	346 7285 7286 7287 K2 KW41 PA459 PsaV PsaVI
scf_12387_176_contig_5	22028	c	T	T	T	T	T	T	T	T	T	c	346 7285 7286 7287 K2 KW41 PA459 PsaV PsaVI
scf_12387_176_contig_5	22270	g	C	C	C	C	C	C	C	C	C	g	346 7285 7286 7287 K2 KW41 PA459 PsaV PsaVI
scf_12387_176_contig_5	22387	c	T	T	T	T	T	T	T	T	T	c	346 7285 7286 7287 K2 KW41 PA459 PsaV PsaVI
scf_12387_176_contig_5	22569	g	A	A	A	A	A	A	A	A	A	g	346 7285 7286 7287 K2 KW41 PA459 PsaV PsaVI
scf_12387_176_contig_5	23597	t	G	G	G	G	G	G	G	G	G	t	346 7285 7286 7287 K2 KW41 PA459 PsaV PsaVI
scf_12387_176_contig_5	341	a	C	C	C	C	C	C	C	C	C	a	346 7285 7286 7287 K2 KW41 PA459 PsaV PsaVI
scf_12387_176_contig_5	452	g	T	T	T	T	T	T	T	T	T	g	346 7285 7286 7287 K2 KW41 PA459 PsaV PsaVI
scf_12387_176_contig_5	4820	g	T	T	T	T	T	T	T	T	T	g	346 7285 7286 7287 K2 KW41 PA459 PsaV PsaVI
scf_12387_176_contig_5	4877	g	C	C	C	C	C	C	C	C	C	g	346 7285 7286 7287 K2 KW41 PA459 PsaV PsaVI
scf_12387_176_contig_5	5509	g	A	A	A	A	A	A	A	A	A	g	346 7285 7286 7287 K2 KW41 PA459 PsaV PsaVI
scf_12387_176_contig_5	5752	g	C	C	C	C	C	C	C	C	C	g	346 7285 7286 7287 K2 KW41 PA459 PsaV PsaVI
scf_12387_176_contig_5	5821	c	G	G	G	G	G	G	G	G	G	c	346 7285 7286 7287 K2 KW41 PA459 PsaV PsaVI
scf_12387_176_contig_5	6097	c	T	T	T	T	T	T	T	T	T	c	346 7285 7286 7287 K2 KW41 PA459 PsaV PsaVI
scf_12387_176_contig_5	6256	a	C	C	C	C	C	C	C	C	C	a	346 7285 7286 7287 K2 KW41 PA459 PsaV PsaVI
scf_12387_176_contig_5	6863	g	A	A	A	A	A	A	A	A	A	g	346 7285 7286 7287 K2 KW41 PA459 PsaV PsaVI
scf_12387_176_contig_5	7897	c	T	T	T	T	T	T	T	T	T	c	346 7285 7286 7287 K2 KW41 PA459 PsaV PsaVI
scf_12387_176_contig_5	8148	c	T	T	T	T	T	T	T	T	T	c	346 7285 7286 7287 K2 KW41 PA459 PsaV PsaVI
scf_12387_176_contig_5	8231	c	G	G	G	G	G	G	G	G	G	c	346 7285 7286 7287 K2 KW41 PA459 PsaV PsaVI
scf_12387_176_contig_5	8827	c	T	T	T	T	T	T	T	T	T	c	346 7285 7286 7287 K2 KW41 PA459 PsaV PsaVI
scf_12387_176_contig_5	8866	c	T	T	T	T	T	T	T	T	T	c	346 7285 7286 7287 K2 KW41 PA459 PsaV PsaVI
scf_12387_176_contig_5	8914	c	T	T	T	T	T	T	T	T	T	c	346 7285 7286 7287 K2 KW41 PA459 PsaV PsaVI
scf_12387_176_contig_5	8920	g	A	A	A	A	A	A	A	A	A	g	346 7285 7286 7287 K2 KW41 PA459 PsaV PsaVI
scf_12387_176_contig_5	8960	a	C	C	C	C	C	C	C	C	C	a	346 7285 7286 7287 K2 KW41 PA459 PsaV PsaVI
scf_12387_176_contig_5	8968	c	T	T	T	T	T	T	T	T	T	c	346 7285 7286 7287 K2 KW41 PA459 PsaV PsaVI
scf_12387_176_contig_5	9007	c	G	G	G	G	G	G	G	G	G	c	346 7285 7286 7287 K2 KW41 PA459 PsaV PsaVI
scf_12387_176_contig_5	9113	c	T	T	T	T	T	T	T	T	T	c	346 7285 7286 7287 K2 KW41 PA459 PsaV PsaVI
scf_12387_176_contig_5	9200	c	T	T	T	T	T	T	T	T	T	c	346 7285 7286 7287 K2 KW41 PA459 PsaV PsaVI
scf_12387_176_contig_5	9935	c	T	T	T	T	T	T	T	T	T	c	346 7285 7286 7287 K2 KW41 PA459 PsaV PsaVI
scf_12387_176_contig_7	1104	t	C	C	C	C	C	C	C	C	C	t	346 7285 7286 7287 K2 KW41 PA459 PsaV PsaVI
scf_12387_176_contig_7	2284	c	T	T	T	T	T	T	T	T	T	c	346 7285 7286 7287 K2 KW41 PA459 PsaV PsaVI
scf_12387_176_contig_7	2355	g	A	A	A	A	A	A	A	A	A	g	346 7285 7286 7287 K2 KW41 PA459 PsaV PsaVI
scf_12387_176_contig_7	2358	g	A	A	A	A	A	A	A	A	A	g	346 7285 7286 7287 K2 KW41 PA459 PsaV PsaVI
scf_12387_176_contig_7	3140	t	C	C	C	C	C	C	C	C	C	t	346 7285 7286 7287 K2 KW41 PA459 PsaV PsaVI
scf_12387_176_contig_7	3192	a	C	C	C	C	C	C	C	C	C	a	346 7285 7286 7287 K2 KW41 PA459 PsaV PsaVI
scf_12387_176_contig_7	3300	t	C	C	C	C	C	C	C	C	C	t	346 7285 7286 7287 K2 KW41 PA459 PsaV PsaVI
scf_12387_176_contig_7	3654	a	T	T	T	T	T	T	T	T	T	a	346 7285 7286 7287 K2 KW41 PA459 PsaV PsaVI
scf_12387_176_contig_7	3660	c	T	T	T	T	T	T	T	T	T	c	346 7285 7286 7287 K2 KW41 PA459 PsaV PsaVI
scf_12387_176_contig_7	3806	a	C	C	C	C	C	C	C	C	C	a	346 7285 7286 7287 K2 KW41 PA459 PsaV PsaVI
scf_12387_176_contig_7	3897	c	G	G	G	G	G	G	G	G	G	c	346 7285 7286 7287 K2 KW41 PA459 PsaV PsaVI
scf_12387_176_contig_7	3903	c	T	T	T	T	T	T	T	T	T	c	346 7285 7286 7287 K2 KW41 PA459 PsaV PsaVI
scf_12387_176_contig_7	3975	t	C	C	C	C	C	C	C	C	C	t	346 7285 7286 7287 K2 KW41 PA459 PsaV PsaVI
scf_12387_176_contig_7	4233	c	T	T	T	T	T	T	T	T	T	c	346 7285 7286 7287 K2 KW41 PA459 PsaV PsaVI
scf_12387_176_contig_7	4303	a	G	G	G	G	G	G	G	G	G	a	346 7285 7286 7287 K2 KW41 PA459 PsaV PsaVI
scf_12387_176_contig_7	4332	t	C	C	C	C	C	C	C	C	C	t	346 7285 7286 7287 K2 KW41 PA459 PsaV PsaVI
scf_12387_176_contig_7	494	a	G	G	G	G	G	G	G	G	G	a	346 7285 7286 7287 K2 KW41 PA459 PsaV PsaVI
scf_12387_184_contig_1	10041	g	C	C	C	C	C	C	C	C	C	g	346 7285 7286 7287 K2 KW41 PA459 PsaV PsaVI
scf_12387_184_contig_1	10053	c	T	T	T	T	T	T	T	T	T	c	346 7285 7286 7287 K2 KW41 PA459 PsaV PsaVI
scf_12387_184_contig_1	10882	g	A	A	A	A	A	A	A	A	A	g	346 7285 7286 7287 K2 KW41 PA459 PsaV PsaVI
scf_12387_184_contig_1	10908	g	A	A	A	A	A	A	A	A	A	g	346 7285 7286 7287 K2 KW41 PA459 PsaV PsaVI
scf_12387_184_contig_1	1096	a	G	G	G	G	G	G	G	G	G	a	346 7285 7286 7287 K2 KW41 PA459 PsaV PsaVI
scf_12387_184_contig_1	11202	c	T	T	T	T	T	T	T	T	T	c	346 7285 7286 7287 K2 KW41 PA459 PsaV PsaVI
scf_12387_184_contig_1	11335	c	T	T	T	T	T	T	T	T	T	c	346 7285 7286 7287 K2 KW41 PA459 PsaV PsaVI
scf_12387_184_contig_1	11450	g	A	A	A	A	A	A	A	A	A	g	346 7285 7286 7287 K2 KW41 PA459 PsaV PsaVI
scf_12387_184_contig_1	11483	c	T	T	T	T	T	T	T	T	T	c	346 7285 7286 7287 K2 KW41 PA459 PsaV PsaVI
scf_12387_184_contig_1	11760	c	T	T	T	T	T	T	T	T	T	c	346 7285 7286 7287 K2 KW41 PA459 PsaV PsaVI
scf_12387_184_contig_1	12327	c	A	A	A	A	A	A	A	A	A	c	346 7285 7286 7287 K2 KW41 PA459 PsaV PsaVI
scf_12387_184_contig_1	12698	g	A	A	A	A	A	A	A	A	A	g	346 7285 7286 7287 K2 KW41 PA459 PsaV PsaVI
scf_12387_184_contig_1	1633	c	T	T	T	T	T	T	T	T	T	c	346 7285 7286 7287 K2 KW41 PA459 PsaV PsaVI
scf_12387_184_contig_1	1675	a	G	G	G	G	G	G	G	G	G	a	346 7285 7286 7287 K2 KW41 PA459 PsaV PsaVI
scf_12387_184_contig_1	3495	c	T	T	T	T	T	T	T	T	T	c	346 7285 7286 7287 K2 KW41 PA459 PsaV PsaVI
scf_12387_184_contig_1	3504	c	T	T	T	T	T	T	T	T	T	c	346 7285 7286 7287 K2 KW41 PA459 PsaV PsaVI
scf_12387_184_contig_1	4048	t	C	C	C	C	C	C	C	C	C	t	346 7285 7286 7287 K2 KW41 PA459 PsaV PsaVI
scf_12387_184_contig_1	4610	t	C	C	C	C	C	C	C	C	C	t	346 7285 7286 7287 K2 KW41 PA459 PsaV PsaVI
scf_12387_184_contig_1	5370	g	A	A	A	A	A	A	A	A	A	g	346 7285 7286 7287 K2 KW41 PA459 PsaV PsaVI
scf_12387_184_contig_1	5410	c	T	T	T	T	T	T	T	T	T	c	346 7285 7286 7287 K2 KW41 PA459 PsaV PsaVI
scf_12387_184_contig_1	5842	c	A	A	A	A	A	A	A	A	A	c	346 7285 7286 7287 K2 KW41 PA459 PsaV PsaVI
scf_12387_184_contig_1	5987	a	C	C	C	C	C	C	C	C	C	a	346 7285 7286 7287 K2 KW41 PA459 PsaV PsaVI
scf_12387_184_contig_1	6030	c	T	T	T	T	T	T	T	T	T	c	346 7285 7286 7287 K2 KW41 PA459 PsaV PsaVI
scf_12387_184_contig_1	6211	a	G	G	G	G	G	G	G	G	G	a	346 7285 7286 7287 K2 KW41 PA459 PsaV PsaVI
scf_12387_184_contig_1	6238	t	C	C	C	C	C	C	C	C	C	t	346 7285 7286 7287 K2 KW41 PA459 PsaV PsaVI
scf_12387_184_contig_1	7430	a	T	T	T	T	T	T	T	T	T	a	346 7285 7286 7287 K2 KW41 PA459 PsaV PsaVI
scf_12387_184_contig_1	7504	t	C	C	C	C	C	C	C	C	C	t	346 7285 7286 7287 K2 KW41 PA459 PsaV PsaVI
scf_12387_184_contig_1	8387	t	C	C	C	C	C	C	C	C	C	t	346 7285 7286 7287 K2 KW41 PA459 PsaV PsaVI
scf_12387_184_contig_3	1344	a	G	G	G	G	G	G	G	G	G	a	346 7285 7286 7287 K2 KW41 PA459 PsaV PsaVI
scf_12387_184_contig_3	1443	c	T	T	T	T	T	T	T	T	T	c	346 7285 7286 7287 K2 KW41 PA459 PsaV PsaVI
scf_12387_184_contig_3	1506	a	G	G	G	G	G	G	G	G	G	a	346 7285 7286 7287 K2 KW41 PA459 PsaV PsaVI
scf_12387_184_contig_3	1614	c	T	T	T	T	T	T	T	T	T	c	346 7285 7286 7287 K2 KW41 PA459 PsaV PsaVI
scf_12387_184_contig_3	2084	g	A	A	A	A	A	A	A	A	A	g	346 7285 7286 7287 K2 KW41 PA459 PsaV PsaVI
scf_12387_184_contig_3	3386	a	G	G	G	G	G	G	G	G	G	a	346 7285 7286 7287 K2 KW41 PA459 PsaV PsaVI
scf_12387_184_contig_3	341	a	G	G	G	G	G	G	G	G	G	a	346 7285 7286 7287 K2 KW41 PA459 PsaV PsaVI
scf_12387_184_contig_3	3818	t	C	C	C	C	C	C	C	C	C	t	346 7285 7286 7287 K2 KW41 PA459 PsaV PsaVI
scf_12387_184_contig_3	4115	t	C	C	C	C	C	C	C	C	C	t	346 7285 7286 7287 K2 KW41 PA459 PsaV PsaVI
scf_12387_184_contig_3	4196	t	C	C	C	C	C	C	C	C	C	t	346 7285 7286 7287 K2 KW41 PA459 PsaV PsaVI
scf_12387_184_contig_3	4970	a	G	G	G	G	G	G	G	G	G	a	346 7285 7286 7287 K2 KW41 PA459 PsaV PsaVI
scf_12387_184_contig_3	5027	t	G	G	G	G	G	G	G	G	G	t	346 7285 7286 7287 K2 KW41 PA459 PsaV PsaVI
scf_12387_184_contig_3	5396	a	G	G	G	G	G	G	G	G	G	a	346 7285 7286 7287 K2 KW41 PA459 PsaV PsaVI
scf_12387_184_contig_3	5450	a	G	G	G	G	G	G	G	G	G	a	346 7285 7286 7287 K2 KW41 PA459 PsaV PsaVI
scf_12387_184_contig_3	5477	t	C	C	C	C	C	C	C	C	C	t	346 7285 7286 7287 K2 KW41 PA459 PsaV PsaVI
scf_12387_184_contig_3	548	g	A	A	A	A	A	A	A	A	A	g	346 7285 7286 7287 K2 KW41 PA459 PsaV PsaVI
scf_12387_184_contig_3	5560	a	G	G	G	G	G	G	G	G	G	a	346 7285 7286 7287 K2 KW41 PA459 PsaV PsaVI
scf_12387_184_contig_3	5567	g	A	A	A	A	A	A	A	A	A	g	346 7285 7286 7287 K2 KW41 PA459 PsaV PsaVI
scf_12387_184_contig_3	5609	t	A	A	A	A	A	A	A	A	A	t	346 7285 7286 7287 K2 KW41 PA459 PsaV PsaVI
scf_12387_184_contig_3	5675	g	A	A	A	A	A	A	A	A	A	g	346 7285 7286 7287 K2 KW41 PA459 PsaV PsaVI
scf_12387_184_contig_3	5819	g	A	A	A	A	A	A	A	A	A	g	346 7285 7286 7287 K2 KW41 PA459 PsaV PsaVI
scf_12387_184_contig_3	5822	g	C	C	C	C	C	C	C	C	C	g	346 7285 7286 7287 K2 KW41 PA459 PsaV PsaVI
scf_12387_184_contig_3	5912	c	T	T	T	T	T	T	T	T	T	c	346 7285 7286 7287 K2 KW41 PA459 PsaV PsaVI
scf_12387_184_contig_3	869	g	T	T	T	T	T	T	T	T	T	g	346 7285 7286 7287 K2 KW41 PA459 PsaV PsaVI
scf_12387_184_contig_3	957	a	G	G	G	G	G	G	G	G	G	a	346 7285 7286 7287 K2 KW41 PA459 PsaV PsaVI
scf_12387_184_contig_5	1002	c	T	T	T	T	T	T	T	T	T	c	346 7285 7286 7287 K2 KW41 PA459 PsaV PsaVI
scf_12387_184_contig_5	1023	a	G	G	G	G	G	G	G	G	G	a	346 7285 7286 7287 K2 KW41 PA459 PsaV PsaVI
scf_12387_184_contig_5	1173	g	A	A	A	A	A	A	A	A	A	g	346 7285 7286 7287 K2 KW41 PA459 PsaV PsaVI
scf_12387_184_contig_5	1209	a	C	C	C	C	C	C	C	C	C	a	346 7285 7286 7287 K2 KW41 PA459 PsaV PsaVI
scf_12387_184_contig_5	1290	a	G	G	G	G	G	G	G	G	G	a	346 7285 7286 7287 K2 KW41 PA459 PsaV PsaVI
scf_12387_184_contig_5	1908	a	G	G	G	G	G	G	G	G	G	a	346 7285 7286 7287 K2 KW41 PA459 PsaV PsaVI
scf_12387_184_contig_5	704	c	T	T	T	T	T	T	T	T	T	c	346 7285 7286 7287 K2 KW41 PA459 PsaV PsaVI
scf_12387_184_contig_5	800	c	A	A	A	A	A	A	A	A	A	c	346 7285 7286 7287 K2 KW41 PA459 PsaV PsaVI
scf_12387_184_contig_7	240	g	C	C	C	C	C	C	C	C	C	g	346 7285 7286 7287 K2 KW41 PA459 PsaV PsaVI
scf_12387_184_contig_7	551	t	C	C	C	C	C	C	C	C	C	t	346 7285 7286 7287 K2 KW41 PA459 PsaV PsaVI
scf_12387_184_contig_9	10361	t	C	C	C	C	C	C	C	C	C	t	346 7285 7286 7287 K2 KW41 PA459 PsaV PsaVI
scf_12387_184_contig_9	10578	t	C	C	C	C	C	C	C	C	C	t	346 7285 7286 7287 K2 KW41 PA459 PsaV PsaVI
scf_12387_184_contig_9	10692	c	T	T	T	T	T	T	T	T	T	c	346 7285 7286 7287 K2 KW41 PA459 PsaV PsaVI
scf_12387_184_contig_9	10743	c	T	T	T	T	T	T	T	T	T	c	346 7285 7286 7287 K2 KW41 PA459 PsaV PsaVI
scf_12387_184_contig_9	10782	c	A	A	A	A	A	A	A	A	A	c	346 7285 7286 7287 K2 KW41 PA459 PsaV PsaVI
scf_12387_184_contig_9	1081	g	A	A	A	A	A	A	A	A	A	g	346 7285 7286 7287 K2 KW41 PA459 PsaV PsaVI
scf_12387_184_contig_9	10935	c	T	T	T	T	T	T	T	T	T	c	346 7285 7286 7287 K2 KW41 PA459 PsaV PsaVI
scf_12387_184_contig_9	11188	c	A	A	A	A	A	A	A	A	A	c	346 7285 7286 7287 K2 KW41 PA459 PsaV PsaVI
scf_12387_184_contig_9	11253	g	A	A	A	A	A	A	A	A	A	g	346 7285 7286 7287 K2 KW41 PA459 PsaV PsaVI
scf_12387_184_contig_9	1147	t	A	A	A	A	A	A	A	A	A	t	346 7285 7286 7287 K2 KW41 PA459 PsaV PsaVI
scf_12387_184_contig_9	11700	t	C	C	C	C	C	C	C	C	C	t	346 7285 7286 7287 K2 KW41 PA459 PsaV PsaVI
scf_12387_184_contig_9	11712	g	C	C	C	C	C	C	C	C	C	g	346 7285 7286 7287 K2 KW41 PA459 PsaV PsaVI
scf_12387_184_contig_9	11757	t	C	C	C	C	C	C	C	C	C	t	346 7285 7286 7287 K2 KW41 PA459 PsaV PsaVI
scf_12387_184_contig_9	11781	g	A	A	A	A	A	A	A	A	A	g	346 7285 7286 7287 K2 KW41 PA459 PsaV PsaVI
scf_12387_184_contig_9	11973	c	T	T	T	T	T	T	T	T	T	c	346 7285 7286 7287 K2 KW41 PA459 PsaV PsaVI
scf_12387_184_contig_9	12198	t	C	C	C	C	C	C	C	C	C	t	346 7285 7286 7287 K2 KW41 PA459 PsaV PsaVI
scf_12387_184_contig_9	12240	g	A	A	A	A	A	A	A	A	A	g	346 7285 7286 7287 K2 KW41 PA459 PsaV PsaVI
scf_12387_184_contig_9	12321	g	A	A	A	A	A	A	A	A	A	g	346 7285 7286 7287 K2 KW41 PA459 PsaV PsaVI
scf_12387_184_contig_9	12432	a	G	G	G	G	G	G	G	G	G	a	346 7285 7286 7287 K2 KW41 PA459 PsaV PsaVI
scf_12387_184_contig_9	12453	c	T	T	T	T	T	T	T	T	T	c	346 7285 7286 7287 K2 KW41 PA459 PsaV PsaVI
scf_12387_184_contig_9	12564	g	C	C	C	C	C	C	C	C	C	g	346 7285 7286 7287 K2 KW41 PA459 PsaV PsaVI
scf_12387_184_contig_9	12615	c	T	T	T	T	T	T	T	T	T	c	346 7285 7286 7287 K2 KW41 PA459 PsaV PsaVI
scf_12387_184_contig_9	12675	g	A	A	A	A	A	A	A	A	A	g	346 7285 7286 7287 K2 KW41 PA459 PsaV PsaVI
scf_12387_184_contig_9	13104	c	T	T	T	T	T	T	T	T	T	c	346 7285 7286 7287 K2 KW41 PA459 PsaV PsaVI
scf_12387_184_contig_9	13267	g	A	A	A	A	A	A	A	A	A	g	346 7285 7286 7287 K2 KW41 PA459 PsaV PsaVI
scf_12387_184_contig_9	13324	g	A	A	A	A	A	A	A	A	A	g	346 7285 7286 7287 K2 KW41 PA459 PsaV PsaVI
scf_12387_184_contig_9	13687	g	T	T	T	T	T	T	T	T	T	g	346 7285 7286 7287 K2 KW41 PA459 PsaV PsaVI
scf_12387_184_contig_9	13768	c	T	T	T	T	T	T	T	T	T	c	346 7285 7286 7287 K2 KW41 PA459 PsaV PsaVI
scf_12387_184_contig_9	13770	c	G	G	G	G	G	G	G	G	G	c	346 7285 7286 7287 K2 KW41 PA459 PsaV PsaVI
scf_12387_184_contig_9	13837	t	C	C	C	C	C	C	C	C	C	t	346 7285 7286 7287 K2 KW41 PA459 PsaV PsaVI
scf_12387_184_contig_9	13912	a	G	G	G	G	G	G	G	G	G	a	346 7285 7286 7287 K2 KW41 PA459 PsaV PsaVI
scf_12387_184_contig_9	1516	g	A	A	A	A	A	A	A	A	A	g	346 7285 7286 7287 K2 KW41 PA459 PsaV PsaVI
scf_12387_184_contig_9	15430	c	T	T	T	T	T	T	T	T	T	c	346 7285 7286 7287 K2 KW41 PA459 PsaV PsaVI
scf_12387_184_contig_9	15484	g	A	A	A	A	A	A	A	A	A	g	346 7285 7286 7287 K2 KW41 PA459 PsaV PsaVI
scf_12387_184_contig_9	15550	a	C	C	C	C	C	C	C	C	C	a	346 7285 7286 7287 K2 KW41 PA459 PsaV PsaVI
scf_12387_184_contig_9	15820	g	A	A	A	A	A	A	A	A	A	g	346 7285 7286 7287 K2 KW41 PA459 PsaV PsaVI
scf_12387_184_contig_9	15928	a	G	G	G	G	G	G	G	G	G	a	346 7285 7286 7287 K2 KW41 PA459 PsaV PsaVI
scf_12387_184_contig_9	15961	g	A	A	A	A	A	A	A	A	A	g	346 7285 7286 7287 K2 KW41 PA459 PsaV PsaVI
scf_12387_184_contig_9	16520	g	A	A	A	A	A	A	A	A	A	g	346 7285 7286 7287 K2 KW41 PA459 PsaV PsaVI
scf_12387_184_contig_9	16828	a	C	C	C	C	C	C	C	C	C	a	346 7285 7286 7287 K2 KW41 PA459 PsaV PsaVI
scf_12387_184_contig_9	17183	g	A	A	A	A	A	A	A	A	A	g	346 7285 7286 7287 K2 KW41 PA459 PsaV PsaVI
scf_12387_184_contig_9	17261	g	A	A	A	A	A	A	A	A	A	g	346 7285 7286 7287 K2 KW41 PA459 PsaV PsaVI
scf_12387_184_contig_9	1744	g	A	A	A	A	A	A	A	A	A	g	346 7285 7286 7287 K2 KW41 PA459 PsaV PsaVI
scf_12387_184_contig_9	1852	g	A	A	A	A	A	A	A	A	A	g	346 7285 7286 7287 K2 KW41 PA459 PsaV PsaVI
scf_12387_184_contig_9	18621	a	G	G	G	G	G	G	G	G	G	a	346 7285 7286 7287 K2 KW41 PA459 PsaV PsaVI
scf_12387_184_contig_9	18678	g	A	A	A	A	A	A	A	A	A	g	346 7285 7286 7287 K2 KW41 PA459 PsaV PsaVI
scf_12387_184_contig_9	18708	c	A	A	A	A	A	A	A	A	A	c	346 7285 7286 7287 K2 KW41 PA459 PsaV PsaVI
scf_12387_184_contig_9	19666	c	T	T	T	T	T	T	T	T	T	c	346 7285 7286 7287 K2 KW41 PA459 PsaV PsaVI
scf_12387_184_contig_9	19762	t	A	A	A	A	A	A	A	A	A	t	346 7285 7286 7287 K2 KW41 PA459 PsaV PsaVI
scf_12387_184_contig_9	2064	g	A	A	A	A	A	A	A	A	A	g	346 7285 7286 7287 K2 KW41 PA459 PsaV PsaVI
scf_12387_184_contig_9	2089	a	G	G	G	G	G	G	G	G	G	a	346 7285 7286 7287 K2 KW41 PA459 PsaV PsaVI
scf_12387_184_contig_9	210	a	G	G	G	G	G	G	G	G	G	a	346 7285 7286 7287 K2 KW41 PA459 PsaV PsaVI
scf_12387_184_contig_9	216	a	G	G	G	G	G	G	G	G	G	a	346 7285 7286 7287 K2 KW41 PA459 PsaV PsaVI
scf_12387_184_contig_9	2226	t	G	G	G	G	G	G	G	G	G	t	346 7285 7286 7287 K2 KW41 PA459 PsaV PsaVI
scf_12387_184_contig_9	229	c	T	T	T	T	T	T	T	T	T	c	346 7285 7286 7287 K2 KW41 PA459 PsaV PsaVI
scf_12387_184_contig_9	2342	a	G	G	G	G	G	G	G	G	G	a	346 7285 7286 7287 K2 KW41 PA459 PsaV PsaVI
scf_12387_184_contig_9	274	g	A	A	A	A	A	A	A	A	A	g	346 7285 7286 7287 K2 KW41 PA459 PsaV PsaVI
scf_12387_184_contig_9	2756	t	C	C	C	C	C	C	C	C	C	t	346 7285 7286 7287 K2 KW41 PA459 PsaV PsaVI
scf_12387_184_contig_9	286	g	A	A	A	A	A	A	A	A	A	g	346 7285 7286 7287 K2 KW41 PA459 PsaV PsaVI
scf_12387_184_contig_9	2949	g	A	A	A	A	A	A	A	A	A	g	346 7285 7286 7287 K2 KW41 PA459 PsaV PsaVI
scf_12387_184_contig_9	385	g	A	A	A	A	A	A	A	A	A	g	346 7285 7286 7287 K2 KW41 PA459 PsaV PsaVI
scf_12387_184_contig_9	457	t	C	C	C	C	C	C	C	C	C	t	346 7285 7286 7287 K2 KW41 PA459 PsaV PsaVI
scf_12387_184_contig_9	532	g	C	C	C	C	C	C	C	C	C	g	346 7285 7286 7287 K2 KW41 PA459 PsaV PsaVI
scf_12387_184_contig_9	5473	a	G	G	G	G	G	G	G	G	G	a	346 7285 7286 7287 K2 KW41 PA459 PsaV PsaVI
scf_12387_184_contig_9	5588	c	A	A	A	A	A	A	A	A	A	c	346 7285 7286 7287 K2 KW41 PA459 PsaV PsaVI
scf_12387_184_contig_9	5589	c	A	A	A	A	A	A	A	A	A	c	346 7285 7286 7287 K2 KW41 PA459 PsaV PsaVI
scf_12387_184_contig_9	5888	c	G	G	G	G	G	G	G	G	G	c	346 7285 7286 7287 K2 KW41 PA459 PsaV PsaVI
scf_12387_184_contig_9	5978	g	A	A	A	A	A	A	A	A	A	g	346 7285 7286 7287 K2 KW41 PA459 PsaV PsaVI
scf_12387_184_contig_9	5981	g	C	C	C	C	C	C	C	C	C	g	346 7285 7286 7287 K2 KW41 PA459 PsaV PsaVI
scf_12387_184_contig_9	6008	c	A	A	A	A	A	A	A	A	A	c	346 7285 7286 7287 K2 KW41 PA459 PsaV PsaVI
scf_12387_184_contig_9	6191	t	C	C	C	C	C	C	C	C	C	t	346 7285 7286 7287 K2 KW41 PA459 PsaV PsaVI
scf_12387_184_contig_9	6233	a	G	G	G	G	G	G	G	G	G	a	346 7285 7286 7287 K2 KW41 PA459 PsaV PsaVI
scf_12387_184_contig_9	625	a	T	T	T	T	T	T	T	T	T	a	346 7285 7286 7287 K2 KW41 PA459 PsaV PsaVI
scf_12387_184_contig_9	6267	c	T	T	T	T	T	T	T	T	T	c	346 7285 7286 7287 K2 KW41 PA459 PsaV PsaVI
scf_12387_184_contig_9	6362	a	C	C	C	C	C	C	C	C	C	a	346 7285 7286 7287 K2 KW41 PA459 PsaV PsaVI
scf_12387_184_contig_9	6464	a	T	T	T	T	T	T	T	T	T	a	346 7285 7286 7287 K2 KW41 PA459 PsaV PsaVI
scf_12387_184_contig_9	6715	a	C	C	C	C	C	C	C	C	C	a	346 7285 7286 7287 K2 KW41 PA459 PsaV PsaVI
scf_12387_184_contig_9	7405	a	T	T	T	T	T	T	T	T	T	a	346 7285 7286 7287 K2 KW41 PA459 PsaV PsaVI
scf_12387_184_contig_9	7453	t	C	C	C	C	C	C	C	C	C	t	346 7285 7286 7287 K2 KW41 PA459 PsaV PsaVI
scf_12387_184_contig_9	7474	t	C	C	C	C	C	C	C	C	C	t	346 7285 7286 7287 K2 KW41 PA459 PsaV PsaVI
scf_12387_184_contig_9	7525	c	G	G	G	G	G	G	G	G	G	c	346 7285 7286 7287 K2 KW41 PA459 PsaV PsaVI
scf_12387_184_contig_9	7579	c	T	T	T	T	T	T	T	T	T	c	346 7285 7286 7287 K2 KW41 PA459 PsaV PsaVI
scf_12387_184_contig_9	835	a	G	G	G	G	G	G	G	G	G	a	346 7285 7286 7287 K2 KW41 PA459 PsaV PsaVI
scf_12387_184_contig_9	8838	t	C	C	C	C	C	C	C	C	C	t	346 7285 7286 7287 K2 KW41 PA459 PsaV PsaVI
scf_12387_184_contig_9	8886	c	T	T	T	T	T	T	T	T	T	c	346 7285 7286 7287 K2 KW41 PA459 PsaV PsaVI
scf_12387_184_contig_9	9053	c	A	A	A	A	A	A	A	A	A	c	346 7285 7286 7287 K2 KW41 PA459 PsaV PsaVI
scf_12387_184_contig_9	9504	g	A	A	A	A	A	A	A	A	A	g	346 7285 7286 7287 K2 KW41 PA459 PsaV PsaVI
scf_12387_184_contig_9	9659	a	T	T	T	T	T	T	T	T	T	a	346 7285 7286 7287 K2 KW41 PA459 PsaV PsaVI
scf_12387_184_contig_9	990	g	A	A	A	A	A	A	A	A	A	g	346 7285 7286 7287 K2 KW41 PA459 PsaV PsaVI
scf_12387_190_contig_11	1175	t	G	G	G	G	G	G	G	G	G	t	346 7285 7286 7287 K2 KW41 PA459 PsaV PsaVI
scf_12387_190_contig_11	1445	c	T	T	T	T	T	T	T	T	T	c	346 7285 7286 7287 K2 KW41 PA459 PsaV PsaVI
scf_12387_190_contig_11	1477	a	G	G	G	G	G	G	G	G	G	a	346 7285 7286 7287 K2 KW41 PA459 PsaV PsaVI
scf_12387_190_contig_11	1688	a	C	C	C	C	C	C	C	C	C	a	346 7285 7286 7287 K2 KW41 PA459 PsaV PsaVI
scf_12387_190_contig_11	1841	c	T	T	T	T	T	T	T	T	T	c	346 7285 7286 7287 K2 KW41 PA459 PsaV PsaVI
scf_12387_190_contig_11	2313	c	T	T	T	T	T	T	T	T	T	c	346 7285 7286 7287 K2 KW41 PA459 PsaV PsaVI
scf_12387_190_contig_11	2514	g	C	C	C	C	C	C	C	C	C	g	346 7285 7286 7287 K2 KW41 PA459 PsaV PsaVI
scf_12387_190_contig_11	2592	g	A	A	A	A	A	A	A	A	A	g	346 7285 7286 7287 K2 KW41 PA459 PsaV PsaVI
scf_12387_190_contig_11	2695	c	T	T	T	T	T	T	T	T	T	c	346 7285 7286 7287 K2 KW41 PA459 PsaV PsaVI
scf_12387_190_contig_11	3143	c	T	T	T	T	T	T	T	T	T	c	346 7285 7286 7287 K2 KW41 PA459 PsaV PsaVI
scf_12387_190_contig_11	3182	c	A	A	A	A	A	A	A	A	A	c	346 7285 7286 7287 K2 KW41 PA459 PsaV PsaVI
scf_12387_190_contig_11	3230	t	C	C	C	C	C	C	C	C	C	t	346 7285 7286 7287 K2 KW41 PA459 PsaV PsaVI
scf_12387_190_contig_11	3293	g	C	C	C	C	C	C	C	C	C	g	346 7285 7286 7287 K2 KW41 PA459 PsaV PsaVI
scf_12387_190_contig_11	3479	c	A	A	A	A	A	A	A	A	A	c	346 7285 7286 7287 K2 KW41 PA459 PsaV PsaVI
scf_12387_190_contig_11	536	c	T	T	T	T	T	T	T	T	T	c	346 7285 7286 7287 K2 KW41 PA459 PsaV PsaVI
scf_12387_190_contig_13	2072	c	T	T	T	T	T	T	T	T	T	c	346 7285 7286 7287 K2 KW41 PA459 PsaV PsaVI
scf_12387_190_contig_13	2156	t	C	C	C	C	C	C	C	C	C	t	346 7285 7286 7287 K2 KW41 PA459 PsaV PsaVI
scf_12387_190_contig_13	236	t	G	G	G	G	G	G	G	G	G	t	346 7285 7286 7287 K2 KW41 PA459 PsaV PsaVI
scf_12387_190_contig_13	2491	a	G	G	G	G	G	G	G	G	G	a	346 7285 7286 7287 K2 KW41 PA459 PsaV PsaVI
scf_12387_190_contig_13	3310	t	C	C	C	C	C	C	C	C	C	t	346 7285 7286 7287 K2 KW41 PA459 PsaV PsaVI
scf_12387_190_contig_13	4840	t	C	C	C	C	C	C	C	C	C	t	346 7285 7286 7287 K2 KW41 PA459 PsaV PsaVI
scf_12387_190_contig_13	531	a	G	G	G	G	G	G	G	G	G	a	346 7285 7286 7287 K2 KW41 PA459 PsaV PsaVI
scf_12387_190_contig_13	555	c	T	T	T	T	T	T	T	T	T	c	346 7285 7286 7287 K2 KW41 PA459 PsaV PsaVI
scf_12387_190_contig_13	6585	c	T	T	T	T	T	T	T	T	T	c	346 7285 7286 7287 K2 KW41 PA459 PsaV PsaVI
scf_12387_190_contig_13	672	t	C	C	C	C	C	C	C	C	C	t	346 7285 7286 7287 K2 KW41 PA459 PsaV PsaVI
scf_12387_190_contig_13	785	c	G	G	G	G	G	G	G	G	G	c	346 7285 7286 7287 K2 KW41 PA459 PsaV PsaVI
scf_12387_190_contig_13	897	t	C	C	C	C	C	C	C	C	C	t	346 7285 7286 7287 K2 KW41 PA459 PsaV PsaVI
scf_12387_190_contig_13	980	t	C	C	C	C	C	C	C	C	C	t	346 7285 7286 7287 K2 KW41 PA459 PsaV PsaVI
scf_12387_190_contig_1	3966	t	C	C	C	C	C	C	C	C	C	t	346 7285 7286 7287 K2 KW41 PA459 PsaV PsaVI
scf_12387_190_contig_1	5756	a	C	C	C	C	C	C	C	C	C	a	346 7285 7286 7287 K2 KW41 PA459 PsaV PsaVI
scf_12387_190_contig_1	878	c	T	T	T	T	T	T	T	T	T	c	346 7285 7286 7287 K2 KW41 PA459 PsaV PsaVI
scf_12387_190_contig_3	10440	t	C	C	C	C	C	C	C	C	C	t	346 7285 7286 7287 K2 KW41 PA459 PsaV PsaVI
scf_12387_190_contig_3	10650	t	C	C	C	C	C	C	C	C	C	t	346 7285 7286 7287 K2 KW41 PA459 PsaV PsaVI
scf_12387_190_contig_3	11242	t	C	C	C	C	C	C	C	C	C	t	346 7285 7286 7287 K2 KW41 PA459 PsaV PsaVI
scf_12387_190_contig_3	11443	c	T	T	T	T	T	T	T	T	T	c	346 7285 7286 7287 K2 KW41 PA459 PsaV PsaVI
scf_12387_190_contig_3	11550	c	T	T	T	T	T	T	T	T	T	c	346 7285 7286 7287 K2 KW41 PA459 PsaV PsaVI
scf_12387_190_contig_3	11556	t	C	C	C	C	C	C	C	C	C	t	346 7285 7286 7287 K2 KW41 PA459 PsaV PsaVI
scf_12387_190_contig_3	11634	a	C	C	C	C	C	C	C	C	C	a	346 7285 7286 7287 K2 KW41 PA459 PsaV PsaVI
scf_12387_190_contig_3	11684	a	T	T	T	T	T	T	T	T	T	a	346 7285 7286 7287 K2 KW41 PA459 PsaV PsaVI
scf_12387_190_contig_3	11690	c	A	A	A	A	A	A	A	A	A	c	346 7285 7286 7287 K2 KW41 PA459 PsaV PsaVI
scf_12387_190_contig_3	11982	t	C	C	C	C	C	C	C	C	C	t	346 7285 7286 7287 K2 KW41 PA459 PsaV PsaVI
scf_12387_190_contig_3	12012	a	G	G	G	G	G	G	G	G	G	a	346 7285 7286 7287 K2 KW41 PA459 PsaV PsaVI
scf_12387_190_contig_3	12063	c	T	T	T	T	T	T	T	T	T	c	346 7285 7286 7287 K2 KW41 PA459 PsaV PsaVI
scf_12387_190_contig_3	14466	a	T	T	T	T	T	T	T	T	T	a	346 7285 7286 7287 K2 KW41 PA459 PsaV PsaVI
scf_12387_190_contig_3	1758	t	C	C	C	C	C	C	C	C	C	t	346 7285 7286 7287 K2 KW41 PA459 PsaV PsaVI
scf_12387_190_contig_3	1773	a	C	C	C	C	C	C	C	C	C	a	346 7285 7286 7287 K2 KW41 PA459 PsaV PsaVI
scf_12387_190_contig_3	1848	a	T	T	T	T	T	T	T	T	T	a	346 7285 7286 7287 K2 KW41 PA459 PsaV PsaVI
scf_12387_190_contig_3	2332	a	C	C	C	C	C	C	C	C	C	a	346 7285 7286 7287 K2 KW41 PA459 PsaV PsaVI
scf_12387_190_contig_3	4106	g	A	A	A	A	A	A	A	A	A	g	346 7285 7286 7287 K2 KW41 PA459 PsaV PsaVI
scf_12387_190_contig_3	4867	t	G	G	G	G	G	G	G	G	G	t	346 7285 7286 7287 K2 KW41 PA459 PsaV PsaVI
scf_12387_190_contig_3	4945	t	G	G	G	G	G	G	G	G	G	t	346 7285 7286 7287 K2 KW41 PA459 PsaV PsaVI
scf_12387_190_contig_3	5269	g	A	A	A	A	A	A	A	A	A	g	346 7285 7286 7287 K2 KW41 PA459 PsaV PsaVI
scf_12387_190_contig_3	5524	c	T	T	T	T	T	T	T	T	T	c	346 7285 7286 7287 K2 KW41 PA459 PsaV PsaVI
scf_12387_190_contig_3	5678	c	T	T	T	T	T	T	T	T	T	c	346 7285 7286 7287 K2 KW41 PA459 PsaV PsaVI
scf_12387_190_contig_3	5693	a	C	C	C	C	C	C	C	C	C	a	346 7285 7286 7287 K2 KW41 PA459 PsaV PsaVI
scf_12387_190_contig_3	6403	g	T	T	T	T	T	T	T	T	T	g	346 7285 7286 7287 K2 KW41 PA459 PsaV PsaVI
scf_12387_190_contig_3	6536	t	C	C	C	C	C	C	C	C	C	t	346 7285 7286 7287 K2 KW41 PA459 PsaV PsaVI
scf_12387_190_contig_3	6568	c	T	T	T	T	T	T	T	T	T	c	346 7285 7286 7287 K2 KW41 PA459 PsaV PsaVI
scf_12387_190_contig_3	6668	c	T	T	T	T	T	T	T	T	T	c	346 7285 7286 7287 K2 KW41 PA459 PsaV PsaVI
scf_12387_190_contig_3	6743	a	G	G	G	G	G	G	G	G	G	a	346 7285 7286 7287 K2 KW41 PA459 PsaV PsaVI
scf_12387_190_contig_3	690	t	C	C	C	C	C	C	C	C	C	t	346 7285 7286 7287 K2 KW41 PA459 PsaV PsaVI
scf_12387_190_contig_3	7775	a	C	C	C	C	C	C	C	C	C	a	346 7285 7286 7287 K2 KW41 PA459 PsaV PsaVI
scf_12387_190_contig_3	7778	c	A	A	A	A	A	A	A	A	A	c	346 7285 7286 7287 K2 KW41 PA459 PsaV PsaVI
scf_12387_190_contig_3	7855	g	A	A	A	A	A	A	A	A	A	g	346 7285 7286 7287 K2 KW41 PA459 PsaV PsaVI
scf_12387_190_contig_3	7861	c	T	T	T	T	T	T	T	T	T	c	346 7285 7286 7287 K2 KW41 PA459 PsaV PsaVI
scf_12387_190_contig_3	866	g	A	A	A	A	A	A	A	A	A	g	346 7285 7286 7287 K2 KW41 PA459 PsaV PsaVI
scf_12387_190_contig_5	10013	g	A	A	A	A	A	A	A	A	A	g	346 7285 7286 7287 K2 KW41 PA459 PsaV PsaVI
scf_12387_190_contig_5	10229	t	C	C	C	C	C	C	C	C	C	t	346 7285 7286 7287 K2 KW41 PA459 PsaV PsaVI
scf_12387_190_contig_5	10281	c	T	T	T	T	T	T	T	T	T	c	346 7285 7286 7287 K2 KW41 PA459 PsaV PsaVI
scf_12387_190_contig_5	10307	c	A	A	A	A	A	A	A	A	A	c	346 7285 7286 7287 K2 KW41 PA459 PsaV PsaVI
scf_12387_190_contig_5	10403	a	G	G	G	G	G	G	G	G	G	a	346 7285 7286 7287 K2 KW41 PA459 PsaV PsaVI
scf_12387_190_contig_5	10634	c	G	G	G	G	G	G	G	G	G	c	346 7285 7286 7287 K2 KW41 PA459 PsaV PsaVI
scf_12387_190_contig_5	12691	g	A	A	A	A	A	A	A	A	A	g	346 7285 7286 7287 K2 KW41 PA459 PsaV PsaVI
scf_12387_190_contig_5	14445	c	A	A	A	A	A	A	A	A	A	c	346 7285 7286 7287 K2 KW41 PA459 PsaV PsaVI
scf_12387_190_contig_5	17386	t	G	G	G	G	G	G	G	G	G	t	346 7285 7286 7287 K2 KW41 PA459 PsaV PsaVI
scf_12387_190_contig_5	17474	t	C	C	C	C	C	C	C	C	C	t	346 7285 7286 7287 K2 KW41 PA459 PsaV PsaVI
scf_12387_190_contig_5	17505	a	C	C	C	C	C	C	C	C	C	a	346 7285 7286 7287 K2 KW41 PA459 PsaV PsaVI
scf_12387_190_contig_5	17552	c	T	T	T	T	T	T	T	T	T	c	346 7285 7286 7287 K2 KW41 PA459 PsaV PsaVI
scf_12387_190_contig_5	17688	g	T	T	T	T	T	T	T	T	T	g	346 7285 7286 7287 K2 KW41 PA459 PsaV PsaVI
scf_12387_190_contig_5	18039	g	A	A	A	A	A	A	A	A	A	g	346 7285 7286 7287 K2 KW41 PA459 PsaV PsaVI
scf_12387_190_contig_5	18563	a	C	C	C	C	C	C	C	C	C	a	346 7285 7286 7287 K2 KW41 PA459 PsaV PsaVI
scf_12387_190_contig_5	18643	a	C	C	C	C	C	C	C	C	C	a	346 7285 7286 7287 K2 KW41 PA459 PsaV PsaVI
scf_12387_190_contig_5	18785	a	G	G	G	G	G	G	G	G	G	a	346 7285 7286 7287 K2 KW41 PA459 PsaV PsaVI
scf_12387_190_contig_5	18794	a	G	G	G	G	G	G	G	G	G	a	346 7285 7286 7287 K2 KW41 PA459 PsaV PsaVI
scf_12387_190_contig_5	18842	c	T	T	T	T	T	T	T	T	T	c	346 7285 7286 7287 K2 KW41 PA459 PsaV PsaVI
scf_12387_190_contig_5	18871	c	A	A	A	A	A	A	A	A	A	c	346 7285 7286 7287 K2 KW41 PA459 PsaV PsaVI
scf_12387_190_contig_5	20068	a	G	G	G	G	G	G	G	G	G	a	346 7285 7286 7287 K2 KW41 PA459 PsaV PsaVI
scf_12387_190_contig_5	244	c	T	T	T	T	T	T	T	T	T	c	346 7285 7286 7287 K2 KW41 PA459 PsaV PsaVI
scf_12387_190_contig_5	4057	c	T	T	T	T	T	T	T	T	T	c	346 7285 7286 7287 K2 KW41 PA459 PsaV PsaVI
scf_12387_190_contig_5	4184	t	A	A	A	A	A	A	A	A	A	t	346 7285 7286 7287 K2 KW41 PA459 PsaV PsaVI
scf_12387_190_contig_5	4669	a	G	G	G	G	G	G	G	G	G	a	346 7285 7286 7287 K2 KW41 PA459 PsaV PsaVI
scf_12387_190_contig_5	4776	c	T	T	T	T	T	T	T	T	T	c	346 7285 7286 7287 K2 KW41 PA459 PsaV PsaVI
scf_12387_190_contig_5	4990	g	A	A	A	A	A	A	A	A	A	g	346 7285 7286 7287 K2 KW41 PA459 PsaV PsaVI
scf_12387_190_contig_5	5113	g	C	C	C	C	C	C	C	C	C	g	346 7285 7286 7287 K2 KW41 PA459 PsaV PsaVI
scf_12387_190_contig_5	5326	t	C	C	C	C	C	C	C	C	C	t	346 7285 7286 7287 K2 KW41 PA459 PsaV PsaVI
scf_12387_190_contig_5	5464	c	A	A	A	A	A	A	A	A	A	c	346 7285 7286 7287 K2 KW41 PA459 PsaV PsaVI
scf_12387_190_contig_5	8851	g	A	A	A	A	A	A	A	A	A	g	346 7285 7286 7287 K2 KW41 PA459 PsaV PsaVI
scf_12387_190_contig_5	9557	a	G	G	G	G	G	G	G	G	G	a	346 7285 7286 7287 K2 KW41 PA459 PsaV PsaVI
scf_12387_190_contig_5	9638	t	C	C	C	C	C	C	C	C	C	t	346 7285 7286 7287 K2 KW41 PA459 PsaV PsaVI
scf_12387_190_contig_5	9710	c	G	G	G	G	G	G	G	G	G	c	346 7285 7286 7287 K2 KW41 PA459 PsaV PsaVI
scf_12387_190_contig_5	9782	c	T	T	T	T	T	T	T	T	T	c	346 7285 7286 7287 K2 KW41 PA459 PsaV PsaVI
scf_12387_190_contig_5	9947	t	C	C	C	C	C	C	C	C	C	t	346 7285 7286 7287 K2 KW41 PA459 PsaV PsaVI
scf_12387_190_contig_5	9992	c	T	T	T	T	T	T	T	T	T	c	346 7285 7286 7287 K2 KW41 PA459 PsaV PsaVI
scf_12387_190_contig_7	10616	c	A	A	A	A	A	A	A	A	A	c	346 7285 7286 7287 K2 KW41 PA459 PsaV PsaVI
scf_12387_190_contig_7	10781	c	T	T	T	T	T	T	T	T	T	c	346 7285 7286 7287 K2 KW41 PA459 PsaV PsaVI
scf_12387_190_contig_7	10790	c	T	T	T	T	T	T	T	T	T	c	346 7285 7286 7287 K2 KW41 PA459 PsaV PsaVI
scf_12387_190_contig_7	1885	t	C	C	C	C	C	C	C	C	C	t	346 7285 7286 7287 K2 KW41 PA459 PsaV PsaVI
scf_12387_190_contig_7	2743	t	C	C	C	C	C	C	C	C	C	t	346 7285 7286 7287 K2 KW41 PA459 PsaV PsaVI
scf_12387_190_contig_7	2884	g	A	A	A	A	A	A	A	A	A	g	346 7285 7286 7287 K2 KW41 PA459 PsaV PsaVI
scf_12387_190_contig_7	2890	g	T	T	T	T	T	T	T	T	T	g	346 7285 7286 7287 K2 KW41 PA459 PsaV PsaVI
scf_12387_190_contig_7	2911	t	C	C	C	C	C	C	C	C	C	t	346 7285 7286 7287 K2 KW41 PA459 PsaV PsaVI
scf_12387_190_contig_7	9743	c	G	G	G	G	G	G	G	G	G	c	346 7285 7286 7287 K2 KW41 PA459 PsaV PsaVI
scf_12387_190_contig_9	1677	a	G	G	G	G	G	G	G	G	G	a	346 7285 7286 7287 K2 KW41 PA459 PsaV PsaVI
scf_12387_190_contig_9	19957	a	G	G	G	G	G	G	G	G	G	a	346 7285 7286 7287 K2 KW41 PA459 PsaV PsaVI
scf_12387_190_contig_9	20175	a	T	T	T	T	T	T	T	T	T	a	346 7285 7286 7287 K2 KW41 PA459 PsaV PsaVI
scf_12387_190_contig_9	22944	a	G	G	G	G	G	G	G	G	G	a	346 7285 7286 7287 K2 KW41 PA459 PsaV PsaVI
scf_12387_190_contig_9	27471	a	G	G	G	G	G	G	G	G	G	a	346 7285 7286 7287 K2 KW41 PA459 PsaV PsaVI
scf_12387_190_contig_9	27562	c	T	T	T	T	T	T	T	T	T	c	346 7285 7286 7287 K2 KW41 PA459 PsaV PsaVI
scf_12387_190_contig_9	27612	c	T	T	T	T	T	T	T	T	T	c	346 7285 7286 7287 K2 KW41 PA459 PsaV PsaVI
scf_12387_190_contig_9	27751	t	C	C	C	C	C	C	C	C	C	t	346 7285 7286 7287 K2 KW41 PA459 PsaV PsaVI
scf_12387_190_contig_9	27893	a	C	C	C	C	C	C	C	C	C	a	346 7285 7286 7287 K2 KW41 PA459 PsaV PsaVI
scf_12387_190_contig_9	28385	c	T	T	T	T	T	T	T	T	T	c	346 7285 7286 7287 K2 KW41 PA459 PsaV PsaVI
scf_12387_190_contig_9	28543	t	C	C	C	C	C	C	C	C	C	t	346 7285 7286 7287 K2 KW41 PA459 PsaV PsaVI
scf_12387_190_contig_9	28847	g	C	C	C	C	C	C	C	C	C	g	346 7285 7286 7287 K2 KW41 PA459 PsaV PsaVI
scf_12387_190_contig_9	29705	c	A	A	A	A	A	A	A	A	A	c	346 7285 7286 7287 K2 KW41 PA459 PsaV PsaVI
scf_12387_190_contig_9	30166	t	C	C	C	C	C	C	C	C	C	t	346 7285 7286 7287 K2 KW41 PA459 PsaV PsaVI
scf_12387_190_contig_9	30975	g	C	C	C	C	C	C	C	C	C	g	346 7285 7286 7287 K2 KW41 PA459 PsaV PsaVI
scf_12387_190_contig_9	31119	c	A	A	A	A	A	A	A	A	A	c	346 7285 7286 7287 K2 KW41 PA459 PsaV PsaVI
scf_12387_190_contig_9	31230	g	A	A	A	A	A	A	A	A	A	g	346 7285 7286 7287 K2 KW41 PA459 PsaV PsaVI
scf_12387_190_contig_9	31611	t	C	C	C	C	C	C	C	C	C	t	346 7285 7286 7287 K2 KW41 PA459 PsaV PsaVI
scf_12387_190_contig_9	5598	c	A	A	A	A	A	A	A	A	A	c	346 7285 7286 7287 K2 KW41 PA459 PsaV PsaVI
scf_12387_193_contig_1	229	a	G	G	G	G	G	G	G	G	G	a	346 7285 7286 7287 K2 KW41 PA459 PsaV PsaVI
scf_12387_1_contig_1	18	t	G	G	G	G	G	G	G	G	G	t	346 7285 7286 7287 K2 KW41 PA459 PsaV PsaVI
scf_12387_1_contig_1	252	g	A	A	A	A	A	A	A	A	A	g	346 7285 7286 7287 K2 KW41 PA459 PsaV PsaVI
scf_12387_226_contig_1	1239	a	G	G	G	G	G	G	G	G	G	a	346 7285 7286 7287 K2 KW41 PA459 PsaV PsaVI
scf_12387_226_contig_1	139	a	G	G	G	G	G	G	G	G	G	a	346 7285 7286 7287 K2 KW41 PA459 PsaV PsaVI
scf_12387_226_contig_1	1495	g	T	T	T	T	T	T	T	T	T	g	346 7285 7286 7287 K2 KW41 PA459 PsaV PsaVI
scf_12387_226_contig_1	153	g	A	A	A	A	A	A	A	A	A	g	346 7285 7286 7287 K2 KW41 PA459 PsaV PsaVI
scf_12387_226_contig_1	173	t	C	C	C	C	C	C	C	C	C	t	346 7285 7286 7287 K2 KW41 PA459 PsaV PsaVI
scf_12387_226_contig_1	632	g	A	A	A	A	A	A	A	A	A	g	346 7285 7286 7287 K2 KW41 PA459 PsaV PsaVI
scf_12387_226_contig_1	656	g	A	A	A	A	A	A	A	A	A	g	346 7285 7286 7287 K2 KW41 PA459 PsaV PsaVI
scf_12387_226_contig_1	695	g	T	T	T	T	T	T	T	T	T	g	346 7285 7286 7287 K2 KW41 PA459 PsaV PsaVI
scf_12387_226_contig_3	157	g	A	A	A	A	A	A	A	A	A	g	346 7285 7286 7287 K2 KW41 PA459 PsaV PsaVI
scf_12387_226_contig_3	1838	g	T	T	T	T	T	T	T	T	T	g	346 7285 7286 7287 K2 KW41 PA459 PsaV PsaVI
scf_12387_226_contig_3	1898	g	A	A	A	A	A	A	A	A	A	g	346 7285 7286 7287 K2 KW41 PA459 PsaV PsaVI
scf_12387_226_contig_3	2069	c	T	T	T	T	T	T	T	T	T	c	346 7285 7286 7287 K2 KW41 PA459 PsaV PsaVI
scf_12387_226_contig_3	2075	c	A	A	A	A	A	A	A	A	A	c	346 7285 7286 7287 K2 KW41 PA459 PsaV PsaVI
scf_12387_226_contig_3	208	c	T	T	T	T	T	T	T	T	T	c	346 7285 7286 7287 K2 KW41 PA459 PsaV PsaVI
scf_12387_226_contig_3	223	c	T	T	T	T	T	T	T	T	T	c	346 7285 7286 7287 K2 KW41 PA459 PsaV PsaVI
scf_12387_226_contig_3	262	t	C	C	C	C	C	C	C	C	C	t	346 7285 7286 7287 K2 KW41 PA459 PsaV PsaVI
scf_12387_226_contig_3	3897	g	A	A	A	A	A	A	A	A	A	g	346 7285 7286 7287 K2 KW41 PA459 PsaV PsaVI
scf_12387_226_contig_7	531	g	A	A	A	A	A	A	A	A	A	g	346 7285 7286 7287 K2 KW41 PA459 PsaV PsaVI
scf_12387_226_contig_7	708	g	T	T	T	T	T	T	T	T	T	g	346 7285 7286 7287 K2 KW41 PA459 PsaV PsaVI
scf_12387_226_contig_7	792	c	A	A	A	A	A	A	A	A	A	c	346 7285 7286 7287 K2 KW41 PA459 PsaV PsaVI
scf_12387_226_contig_7	820	g	A	A	A	A	A	A	A	A	A	g	346 7285 7286 7287 K2 KW41 PA459 PsaV PsaVI
scf_12387_232_contig_1	125	t	G	G	G	G	G	G	G	G	G	t	346 7285 7286 7287 K2 KW41 PA459 PsaV PsaVI
scf_12387_232_contig_1	1522	g	A	A	A	A	A	A	A	A	A	g	346 7285 7286 7287 K2 KW41 PA459 PsaV PsaVI
scf_12387_232_contig_1	1975	a	G	G	G	G	G	G	G	G	G	a	346 7285 7286 7287 K2 KW41 PA459 PsaV PsaVI
scf_12387_232_contig_1	470	g	A	A	A	A	A	A	A	A	A	g	346 7285 7286 7287 K2 KW41 PA459 PsaV PsaVI
scf_12387_232_contig_1	569	g	T	T	T	T	T	T	T	T	T	g	346 7285 7286 7287 K2 KW41 PA459 PsaV PsaVI
scf_12387_232_contig_1	635	t	C	C	C	C	C	C	C	C	C	t	346 7285 7286 7287 K2 KW41 PA459 PsaV PsaVI
scf_12387_232_contig_1	644	c	A	A	A	A	A	A	A	A	A	c	346 7285 7286 7287 K2 KW41 PA459 PsaV PsaVI
scf_12387_232_contig_1	762	g	C	C	C	C	C	C	C	C	C	g	346 7285 7286 7287 K2 KW41 PA459 PsaV PsaVI
scf_12387_232_contig_1	770	t	G	G	G	G	G	G	G	G	G	t	346 7285 7286 7287 K2 KW41 PA459 PsaV PsaVI
scf_12387_232_contig_1	989	t	C	C	C	C	C	C	C	C	C	t	346 7285 7286 7287 K2 KW41 PA459 PsaV PsaVI
scf_12387_232_contig_5	1229	t	C	C	C	C	C	C	C	C	C	t	346 7285 7286 7287 K2 KW41 PA459 PsaV PsaVI
scf_12387_232_contig_5	1338	c	T	T	T	T	T	T	T	T	T	c	346 7285 7286 7287 K2 KW41 PA459 PsaV PsaVI
scf_12387_232_contig_5	1372	g	T	T	T	T	T	T	T	T	T	g	346 7285 7286 7287 K2 KW41 PA459 PsaV PsaVI
scf_12387_232_contig_5	1471	t	C	C	C	C	C	C	C	C	C	t	346 7285 7286 7287 K2 KW41 PA459 PsaV PsaVI
scf_12387_232_contig_5	1577	c	A	A	A	A	A	A	A	A	A	c	346 7285 7286 7287 K2 KW41 PA459 PsaV PsaVI
scf_12387_232_contig_5	1675	t	G	G	G	G	G	G	G	G	G	t	346 7285 7286 7287 K2 KW41 PA459 PsaV PsaVI
scf_12387_232_contig_5	2123	g	A	A	A	A	A	A	A	A	A	g	346 7285 7286 7287 K2 KW41 PA459 PsaV PsaVI
scf_12387_232_contig_5	2326	g	A	A	A	A	A	A	A	A	A	g	346 7285 7286 7287 K2 KW41 PA459 PsaV PsaVI
scf_12387_232_contig_5	2410	a	C	C	C	C	C	C	C	C	C	a	346 7285 7286 7287 K2 KW41 PA459 PsaV PsaVI
scf_12387_232_contig_5	2635	c	A	A	A	A	A	A	A	A	A	c	346 7285 7286 7287 K2 KW41 PA459 PsaV PsaVI
scf_12387_232_contig_5	2679	t	A	A	A	A	A	A	A	A	A	t	346 7285 7286 7287 K2 KW41 PA459 PsaV PsaVI
scf_12387_232_contig_5	2731	g	A	A	A	A	A	A	A	A	A	g	346 7285 7286 7287 K2 KW41 PA459 PsaV PsaVI
scf_12387_232_contig_5	2810	t	C	C	C	C	C	C	C	C	C	t	346 7285 7286 7287 K2 KW41 PA459 PsaV PsaVI
scf_12387_232_contig_5	2852	g	A	A	A	A	A	A	A	A	A	g	346 7285 7286 7287 K2 KW41 PA459 PsaV PsaVI
scf_12387_232_contig_5	3294	g	A	A	A	A	A	A	A	A	A	g	346 7285 7286 7287 K2 KW41 PA459 PsaV PsaVI
scf_12387_232_contig_5	3397	t	C	C	C	C	C	C	C	C	C	t	346 7285 7286 7287 K2 KW41 PA459 PsaV PsaVI
scf_12387_232_contig_7	1172	g	A	A	A	A	A	A	A	A	A	g	346 7285 7286 7287 K2 KW41 PA459 PsaV PsaVI
scf_12387_232_contig_7	224	g	C	C	C	C	C	C	C	C	C	g	346 7285 7286 7287 K2 KW41 PA459 PsaV PsaVI
scf_12387_232_contig_7	500	a	G	G	G	G	G	G	G	G	G	a	346 7285 7286 7287 K2 KW41 PA459 PsaV PsaVI
scf_12387_232_contig_7	536	g	A	A	A	A	A	A	A	A	A	g	346 7285 7286 7287 K2 KW41 PA459 PsaV PsaVI
scf_12387_232_contig_7	743	a	G	G	G	G	G	G	G	G	G	a	346 7285 7286 7287 K2 KW41 PA459 PsaV PsaVI
scf_12387_232_contig_7	797	g	C	C	C	C	C	C	C	C	C	g	346 7285 7286 7287 K2 KW41 PA459 PsaV PsaVI
scf_12387_232_contig_7	835	g	A	A	A	A	A	A	A	A	A	g	346 7285 7286 7287 K2 KW41 PA459 PsaV PsaVI
scf_12387_232_contig_7	836	c	G	G	G	G	G	G	G	G	G	c	346 7285 7286 7287 K2 KW41 PA459 PsaV PsaVI
scf_12387_232_contig_7	872	g	A	A	A	A	A	A	A	A	A	g	346 7285 7286 7287 K2 KW41 PA459 PsaV PsaVI
scf_12387_237_contig_101	1166	t	C	C	C	C	C	C	C	C	C	t	346 7285 7286 7287 K2 KW41 PA459 PsaV PsaVI
scf_12387_237_contig_101	1219	g	T	T	T	T	T	T	T	T	T	g	346 7285 7286 7287 K2 KW41 PA459 PsaV PsaVI
scf_12387_237_contig_101	1296	a	G	G	G	G	G	G	G	G	G	a	346 7285 7286 7287 K2 KW41 PA459 PsaV PsaVI
scf_12387_237_contig_101	1474	c	A	A	A	A	A	A	A	A	A	c	346 7285 7286 7287 K2 KW41 PA459 PsaV PsaVI
scf_12387_237_contig_101	1675	g	A	A	A	A	A	A	A	A	A	g	346 7285 7286 7287 K2 KW41 PA459 PsaV PsaVI
scf_12387_237_contig_101	1740	g	C	C	C	C	C	C	C	C	C	g	346 7285 7286 7287 K2 KW41 PA459 PsaV PsaVI
scf_12387_237_contig_103	64	t	C	C	C	C	C	C	C	C	C	t	346 7285 7286 7287 K2 KW41 PA459 PsaV PsaVI
scf_12387_237_contig_103	76	g	A	A	A	A	A	A	A	A	A	g	346 7285 7286 7287 K2 KW41 PA459 PsaV PsaVI
scf_12387_237_contig_105	356	g	A	A	A	A	A	A	A	A	A	g	346 7285 7286 7287 K2 KW41 PA459 PsaV PsaVI
scf_12387_237_contig_107	100	g	T	T	T	T	T	T	T	T	T	g	346 7285 7286 7287 K2 KW41 PA459 PsaV PsaVI
scf_12387_237_contig_107	204	g	A	A	A	A	A	A	A	A	A	g	346 7285 7286 7287 K2 KW41 PA459 PsaV PsaVI
scf_12387_237_contig_107	222	c	T	T	T	T	T	T	T	T	T	c	346 7285 7286 7287 K2 KW41 PA459 PsaV PsaVI
scf_12387_237_contig_107	297	t	C	C	C	C	C	C	C	C	C	t	346 7285 7286 7287 K2 KW41 PA459 PsaV PsaVI
scf_12387_237_contig_109	174	t	C	C	C	C	C	C	C	C	C	t	346 7285 7286 7287 K2 KW41 PA459 PsaV PsaVI
scf_12387_237_contig_109	185	t	C	C	C	C	C	C	C	C	C	t	346 7285 7286 7287 K2 KW41 PA459 PsaV PsaVI
scf_12387_237_contig_109	60	a	G	G	G	G	G	G	G	G	G	a	346 7285 7286 7287 K2 KW41 PA459 PsaV PsaVI
scf_12387_237_contig_111	1728	g	A	A	A	A	A	A	A	A	A	g	346 7285 7286 7287 K2 KW41 PA459 PsaV PsaVI
scf_12387_237_contig_113	149	c	T	T	T	T	T	T	T	T	T	c	346 7285 7286 7287 K2 KW41 PA459 PsaV PsaVI
scf_12387_237_contig_115	2446	g	A	A	A	A	A	A	A	A	A	g	346 7285 7286 7287 K2 KW41 PA459 PsaV PsaVI
scf_12387_237_contig_115	2526	g	A	A	A	A	A	A	A	A	A	g	346 7285 7286 7287 K2 KW41 PA459 PsaV PsaVI
scf_12387_237_contig_115	2652	t	C	C	C	C	C	C	C	C	C	t	346 7285 7286 7287 K2 KW41 PA459 PsaV PsaVI
scf_12387_237_contig_115	2999	t	C	C	C	C	C	C	C	C	C	t	346 7285 7286 7287 K2 KW41 PA459 PsaV PsaVI
scf_12387_237_contig_115	446	a	G	G	G	G	G	G	G	G	G	a	346 7285 7286 7287 K2 KW41 PA459 PsaV PsaVI
scf_12387_237_contig_11	1689	c	T	T	T	T	T	T	T	T	T	c	346 7285 7286 7287 K2 KW41 PA459 PsaV PsaVI
scf_12387_237_contig_11	1742	g	T	T	T	T	T	T	T	T	T	g	346 7285 7286 7287 K2 KW41 PA459 PsaV PsaVI
scf_12387_237_contig_11	1802	a	G	G	G	G	G	G	G	G	G	a	346 7285 7286 7287 K2 KW41 PA459 PsaV PsaVI
scf_12387_237_contig_11	1928	t	C	C	C	C	C	C	C	C	C	t	346 7285 7286 7287 K2 KW41 PA459 PsaV PsaVI
scf_12387_237_contig_11	1975	t	C	C	C	C	C	C	C	C	C	t	346 7285 7286 7287 K2 KW41 PA459 PsaV PsaVI
scf_12387_237_contig_11	2067	t	C	C	C	C	C	C	C	C	C	t	346 7285 7286 7287 K2 KW41 PA459 PsaV PsaVI
scf_12387_237_contig_11	2581	c	T	T	T	T	T	T	T	T	T	c	346 7285 7286 7287 K2 KW41 PA459 PsaV PsaVI
scf_12387_237_contig_11	2692	c	T	T	T	T	T	T	T	T	T	c	346 7285 7286 7287 K2 KW41 PA459 PsaV PsaVI
scf_12387_237_contig_11	2823	a	T	T	T	T	T	T	T	T	T	a	346 7285 7286 7287 K2 KW41 PA459 PsaV PsaVI
scf_12387_237_contig_11	3305	a	G	G	G	G	G	G	G	G	G	a	346 7285 7286 7287 K2 KW41 PA459 PsaV PsaVI
scf_12387_237_contig_11	3554	t	A	A	A	A	A	A	A	A	A	t	346 7285 7286 7287 K2 KW41 PA459 PsaV PsaVI
scf_12387_237_contig_11	3584	c	T	T	T	T	T	T	T	T	T	c	346 7285 7286 7287 K2 KW41 PA459 PsaV PsaVI
scf_12387_237_contig_11	3743	g	A	A	A	A	A	A	A	A	A	g	346 7285 7286 7287 K2 KW41 PA459 PsaV PsaVI
scf_12387_237_contig_11	3761	t	C	C	C	C	C	C	C	C	C	t	346 7285 7286 7287 K2 KW41 PA459 PsaV PsaVI
scf_12387_237_contig_11	4055	g	C	C	C	C	C	C	C	C	C	g	346 7285 7286 7287 K2 KW41 PA459 PsaV PsaVI
scf_12387_237_contig_11	4205	a	C	C	C	C	C	C	C	C	C	a	346 7285 7286 7287 K2 KW41 PA459 PsaV PsaVI
scf_12387_237_contig_11	4400	c	A	A	A	A	A	A	A	A	A	c	346 7285 7286 7287 K2 KW41 PA459 PsaV PsaVI
scf_12387_237_contig_11	4484	c	T	T	T	T	T	T	T	T	T	c	346 7285 7286 7287 K2 KW41 PA459 PsaV PsaVI
scf_12387_237_contig_11	4532	g	A	A	A	A	A	A	A	A	A	g	346 7285 7286 7287 K2 KW41 PA459 PsaV PsaVI
scf_12387_237_contig_121	1942	g	T	T	T	T	T	T	T	T	T	g	346 7285 7286 7287 K2 KW41 PA459 PsaV PsaVI
scf_12387_237_contig_121	2101	c	T	T	T	T	T	T	T	T	T	c	346 7285 7286 7287 K2 KW41 PA459 PsaV PsaVI
scf_12387_237_contig_121	2872	c	G	G	G	G	G	G	G	G	G	c	346 7285 7286 7287 K2 KW41 PA459 PsaV PsaVI
scf_12387_237_contig_121	332	a	G	G	G	G	G	G	G	G	G	a	346 7285 7286 7287 K2 KW41 PA459 PsaV PsaVI
scf_12387_237_contig_121	37	g	A	A	A	A	A	A	A	A	A	g	346 7285 7286 7287 K2 KW41 PA459 PsaV PsaVI
scf_12387_237_contig_121	3795	t	C	C	C	C	C	C	C	C	C	t	346 7285 7286 7287 K2 KW41 PA459 PsaV PsaVI
scf_12387_237_contig_121	3807	c	G	G	G	G	G	G	G	G	G	c	346 7285 7286 7287 K2 KW41 PA459 PsaV PsaVI
scf_12387_237_contig_121	3900	c	T	T	T	T	T	T	T	T	T	c	346 7285 7286 7287 K2 KW41 PA459 PsaV PsaVI
scf_12387_237_contig_121	3966	g	A	A	A	A	A	A	A	A	A	g	346 7285 7286 7287 K2 KW41 PA459 PsaV PsaVI
scf_12387_237_contig_121	410	a	G	G	G	G	G	G	G	G	G	a	346 7285 7286 7287 K2 KW41 PA459 PsaV PsaVI
scf_12387_237_contig_121	4193	g	T	T	T	T	T	T	T	T	T	g	346 7285 7286 7287 K2 KW41 PA459 PsaV PsaVI
scf_12387_237_contig_121	425	c	G	G	G	G	G	G	G	G	G	c	346 7285 7286 7287 K2 KW41 PA459 PsaV PsaVI
scf_12387_237_contig_121	428	a	G	G	G	G	G	G	G	G	G	a	346 7285 7286 7287 K2 KW41 PA459 PsaV PsaVI
scf_12387_237_contig_121	616	g	A	A	A	A	A	A	A	A	A	g	346 7285 7286 7287 K2 KW41 PA459 PsaV PsaVI
scf_12387_237_contig_121	701	g	A	A	A	A	A	A	A	A	A	g	346 7285 7286 7287 K2 KW41 PA459 PsaV PsaVI
scf_12387_237_contig_121	785	t	A	A	A	A	A	A	A	A	A	t	346 7285 7286 7287 K2 KW41 PA459 PsaV PsaVI
scf_12387_237_contig_123	1481	t	C	C	C	C	C	C	C	C	C	t	346 7285 7286 7287 K2 KW41 PA459 PsaV PsaVI
scf_12387_237_contig_123	1515	t	C	C	C	C	C	C	C	C	C	t	346 7285 7286 7287 K2 KW41 PA459 PsaV PsaVI
scf_12387_237_contig_123	1668	t	C	C	C	C	C	C	C	C	C	t	346 7285 7286 7287 K2 KW41 PA459 PsaV PsaVI
scf_12387_237_contig_123	302	g	A	A	A	A	A	A	A	A	A	g	346 7285 7286 7287 K2 KW41 PA459 PsaV PsaVI
scf_12387_237_contig_123	367	c	T	T	T	T	T	T	T	T	T	c	346 7285 7286 7287 K2 KW41 PA459 PsaV PsaVI
scf_12387_237_contig_123	470	g	A	A	A	A	A	A	A	A	A	g	346 7285 7286 7287 K2 KW41 PA459 PsaV PsaVI
scf_12387_237_contig_123	72	g	A	A	A	A	A	A	A	A	A	g	346 7285 7286 7287 K2 KW41 PA459 PsaV PsaVI
scf_12387_237_contig_123	87	t	C	C	C	C	C	C	C	C	C	t	346 7285 7286 7287 K2 KW41 PA459 PsaV PsaVI
scf_12387_237_contig_125	1011	g	A	A	A	A	A	A	A	A	A	g	346 7285 7286 7287 K2 KW41 PA459 PsaV PsaVI
scf_12387_237_contig_127	331	a	G	G	G	G	G	G	G	G	G	a	346 7285 7286 7287 K2 KW41 PA459 PsaV PsaVI
scf_12387_237_contig_129	1064	g	A	A	A	A	A	A	A	A	A	g	346 7285 7286 7287 K2 KW41 PA459 PsaV PsaVI
scf_12387_237_contig_129	1187	c	T	T	T	T	T	T	T	T	T	c	346 7285 7286 7287 K2 KW41 PA459 PsaV PsaVI
scf_12387_237_contig_129	1214	c	T	T	T	T	T	T	T	T	T	c	346 7285 7286 7287 K2 KW41 PA459 PsaV PsaVI
scf_12387_237_contig_129	1262	g	A	A	A	A	A	A	A	A	A	g	346 7285 7286 7287 K2 KW41 PA459 PsaV PsaVI
scf_12387_237_contig_129	1478	g	A	A	A	A	A	A	A	A	A	g	346 7285 7286 7287 K2 KW41 PA459 PsaV PsaVI
scf_12387_237_contig_129	1487	g	A	A	A	A	A	A	A	A	A	g	346 7285 7286 7287 K2 KW41 PA459 PsaV PsaVI
scf_12387_237_contig_129	1586	c	T	T	T	T	T	T	T	T	T	c	346 7285 7286 7287 K2 KW41 PA459 PsaV PsaVI
scf_12387_237_contig_129	1664	t	C	C	C	C	C	C	C	C	C	t	346 7285 7286 7287 K2 KW41 PA459 PsaV PsaVI
scf_12387_237_contig_129	2238	g	A	A	A	A	A	A	A	A	A	g	346 7285 7286 7287 K2 KW41 PA459 PsaV PsaVI
scf_12387_237_contig_129	2265	g	A	A	A	A	A	A	A	A	A	g	346 7285 7286 7287 K2 KW41 PA459 PsaV PsaVI
scf_12387_237_contig_129	2391	a	G	G	G	G	G	G	G	G	G	a	346 7285 7286 7287 K2 KW41 PA459 PsaV PsaVI
scf_12387_237_contig_129	2514	t	C	C	C	C	C	C	C	C	C	t	346 7285 7286 7287 K2 KW41 PA459 PsaV PsaVI
scf_12387_237_contig_129	2556	g	A	A	A	A	A	A	A	A	A	g	346 7285 7286 7287 K2 KW41 PA459 PsaV PsaVI
scf_12387_237_contig_129	2568	c	T	T	T	T	T	T	T	T	T	c	346 7285 7286 7287 K2 KW41 PA459 PsaV PsaVI
scf_12387_237_contig_129	2592	a	G	G	G	G	G	G	G	G	G	a	346 7285 7286 7287 K2 KW41 PA459 PsaV PsaVI
scf_12387_237_contig_129	2637	c	T	T	T	T	T	T	T	T	T	c	346 7285 7286 7287 K2 KW41 PA459 PsaV PsaVI
scf_12387_237_contig_129	2883	g	C	C	C	C	C	C	C	C	C	g	346 7285 7286 7287 K2 KW41 PA459 PsaV PsaVI
scf_12387_237_contig_129	2889	a	G	G	G	G	G	G	G	G	G	a	346 7285 7286 7287 K2 KW41 PA459 PsaV PsaVI
scf_12387_237_contig_129	3226	g	T	T	T	T	T	T	T	T	T	g	346 7285 7286 7287 K2 KW41 PA459 PsaV PsaVI
scf_12387_237_contig_129	3469	c	A	A	A	A	A	A	A	A	A	c	346 7285 7286 7287 K2 KW41 PA459 PsaV PsaVI
scf_12387_237_contig_129	3644	t	C	C	C	C	C	C	C	C	C	t	346 7285 7286 7287 K2 KW41 PA459 PsaV PsaVI
scf_12387_237_contig_129	4213	g	A	A	A	A	A	A	A	A	A	g	346 7285 7286 7287 K2 KW41 PA459 PsaV PsaVI
scf_12387_237_contig_129	605	g	A	A	A	A	A	A	A	A	A	g	346 7285 7286 7287 K2 KW41 PA459 PsaV PsaVI
scf_12387_237_contig_129	728	c	T	T	T	T	T	T	T	T	T	c	346 7285 7286 7287 K2 KW41 PA459 PsaV PsaVI
scf_12387_237_contig_129	848	g	A	A	A	A	A	A	A	A	A	g	346 7285 7286 7287 K2 KW41 PA459 PsaV PsaVI
scf_12387_237_contig_129	956	g	C	C	C	C	C	C	C	C	C	g	346 7285 7286 7287 K2 KW41 PA459 PsaV PsaVI
scf_12387_237_contig_131	2805	a	C	C	C	C	C	C	C	C	C	a	346 7285 7286 7287 K2 KW41 PA459 PsaV PsaVI
scf_12387_237_contig_131	814	t	C	C	C	C	C	C	C	C	C	t	346 7285 7286 7287 K2 KW41 PA459 PsaV PsaVI
scf_12387_237_contig_133	4504	g	A	A	A	A	A	A	A	A	A	g	346 7285 7286 7287 K2 KW41 PA459 PsaV PsaVI
scf_12387_237_contig_133	4708	g	A	A	A	A	A	A	A	A	A	g	346 7285 7286 7287 K2 KW41 PA459 PsaV PsaVI
scf_12387_237_contig_133	4726	g	A	A	A	A	A	A	A	A	A	g	346 7285 7286 7287 K2 KW41 PA459 PsaV PsaVI
scf_12387_237_contig_133	4801	c	A	A	A	A	A	A	A	A	A	c	346 7285 7286 7287 K2 KW41 PA459 PsaV PsaVI
scf_12387_237_contig_133	4816	g	A	A	A	A	A	A	A	A	A	g	346 7285 7286 7287 K2 KW41 PA459 PsaV PsaVI
scf_12387_237_contig_133	4879	c	T	T	T	T	T	T	T	T	T	c	346 7285 7286 7287 K2 KW41 PA459 PsaV PsaVI
scf_12387_237_contig_133	4930	t	C	C	C	C	C	C	C	C	C	t	346 7285 7286 7287 K2 KW41 PA459 PsaV PsaVI
scf_12387_237_contig_133	5185	c	T	T	T	T	T	T	T	T	T	c	346 7285 7286 7287 K2 KW41 PA459 PsaV PsaVI
scf_12387_237_contig_133	5190	c	T	T	T	T	T	T	T	T	T	c	346 7285 7286 7287 K2 KW41 PA459 PsaV PsaVI
scf_12387_237_contig_133	5338	c	T	T	T	T	T	T	T	T	T	c	346 7285 7286 7287 K2 KW41 PA459 PsaV PsaVI
scf_12387_237_contig_133	5383	a	G	G	G	G	G	G	G	G	G	a	346 7285 7286 7287 K2 KW41 PA459 PsaV PsaVI
scf_12387_237_contig_133	5392	t	C	C	C	C	C	C	C	C	C	t	346 7285 7286 7287 K2 KW41 PA459 PsaV PsaVI
scf_12387_237_contig_133	5458	c	T	T	T	T	T	T	T	T	T	c	346 7285 7286 7287 K2 KW41 PA459 PsaV PsaVI
scf_12387_237_contig_133	5504	t	C	C	C	C	C	C	C	C	C	t	346 7285 7286 7287 K2 KW41 PA459 PsaV PsaVI
scf_12387_237_contig_133	5547	c	T	T	T	T	T	T	T	T	T	c	346 7285 7286 7287 K2 KW41 PA459 PsaV PsaVI
scf_12387_237_contig_133	5584	g	A	A	A	A	A	A	A	A	A	g	346 7285 7286 7287 K2 KW41 PA459 PsaV PsaVI
scf_12387_237_contig_133	5631	c	T	T	T	T	T	T	T	T	T	c	346 7285 7286 7287 K2 KW41 PA459 PsaV PsaVI
scf_12387_237_contig_133	5645	a	G	G	G	G	G	G	G	G	G	a	346 7285 7286 7287 K2 KW41 PA459 PsaV PsaVI
scf_12387_237_contig_133	5743	a	T	T	T	T	T	T	T	T	T	a	346 7285 7286 7287 K2 KW41 PA459 PsaV PsaVI
scf_12387_237_contig_133	5829	c	T	T	T	T	T	T	T	T	T	c	346 7285 7286 7287 K2 KW41 PA459 PsaV PsaVI
scf_12387_237_contig_133	5835	g	T	T	T	T	T	T	T	T	T	g	346 7285 7286 7287 K2 KW41 PA459 PsaV PsaVI
scf_12387_237_contig_133	5919	a	G	G	G	G	G	G	G	G	G	a	346 7285 7286 7287 K2 KW41 PA459 PsaV PsaVI
scf_12387_237_contig_133	6015	c	T	T	T	T	T	T	T	T	T	c	346 7285 7286 7287 K2 KW41 PA459 PsaV PsaVI
scf_12387_237_contig_133	6030	g	A	A	A	A	A	A	A	A	A	g	346 7285 7286 7287 K2 KW41 PA459 PsaV PsaVI
scf_12387_237_contig_133	6345	g	A	A	A	A	A	A	A	A	A	g	346 7285 7286 7287 K2 KW41 PA459 PsaV PsaVI
scf_12387_237_contig_133	6493	a	C	C	C	C	C	C	C	C	C	a	346 7285 7286 7287 K2 KW41 PA459 PsaV PsaVI
scf_12387_237_contig_135	3030	g	A	A	A	A	A	A	A	A	A	g	346 7285 7286 7287 K2 KW41 PA459 PsaV PsaVI
scf_12387_237_contig_135	3490	g	A	A	A	A	A	A	A	A	A	g	346 7285 7286 7287 K2 KW41 PA459 PsaV PsaVI
scf_12387_237_contig_135	36	a	T	T	T	T	T	T	T	T	T	a	346 7285 7286 7287 K2 KW41 PA459 PsaV PsaVI
scf_12387_237_contig_137	188	c	T	T	T	T	T	T	T	T	T	c	346 7285 7286 7287 K2 KW41 PA459 PsaV PsaVI
scf_12387_237_contig_139	255	c	T	T	T	T	T	T	T	T	T	c	346 7285 7286 7287 K2 KW41 PA459 PsaV PsaVI
scf_12387_237_contig_139	366	g	A	A	A	A	A	A	A	A	A	g	346 7285 7286 7287 K2 KW41 PA459 PsaV PsaVI
scf_12387_237_contig_139	546	t	C	C	C	C	C	C	C	C	C	t	346 7285 7286 7287 K2 KW41 PA459 PsaV PsaVI
scf_12387_237_contig_139	664	g	A	A	A	A	A	A	A	A	A	g	346 7285 7286 7287 K2 KW41 PA459 PsaV PsaVI
scf_12387_237_contig_13	10161	t	C	C	C	C	C	C	C	C	C	t	346 7285 7286 7287 K2 KW41 PA459 PsaV PsaVI
scf_12387_237_contig_13	10578	t	C	C	C	C	C	C	C	C	C	t	346 7285 7286 7287 K2 KW41 PA459 PsaV PsaVI
scf_12387_237_contig_13	11448	t	C	C	C	C	C	C	C	C	C	t	346 7285 7286 7287 K2 KW41 PA459 PsaV PsaVI
scf_12387_237_contig_13	11460	g	T	T	T	T	T	T	T	T	T	g	346 7285 7286 7287 K2 KW41 PA459 PsaV PsaVI
scf_12387_237_contig_13	11502	a	G	G	G	G	G	G	G	G	G	a	346 7285 7286 7287 K2 KW41 PA459 PsaV PsaVI
scf_12387_237_contig_13	2001	c	G	G	G	G	G	G	G	G	G	c	346 7285 7286 7287 K2 KW41 PA459 PsaV PsaVI
scf_12387_237_contig_13	2148	g	A	A	A	A	A	A	A	A	A	g	346 7285 7286 7287 K2 KW41 PA459 PsaV PsaVI
scf_12387_237_contig_13	220	t	G	G	G	G	G	G	G	G	G	t	346 7285 7286 7287 K2 KW41 PA459 PsaV PsaVI
scf_12387_237_contig_13	2249	c	G	G	G	G	G	G	G	G	G	c	346 7285 7286 7287 K2 KW41 PA459 PsaV PsaVI
scf_12387_237_contig_13	2259	g	C	C	C	C	C	C	C	C	C	g	346 7285 7286 7287 K2 KW41 PA459 PsaV PsaVI
scf_12387_237_contig_13	226	c	T	T	T	T	T	T	T	T	T	c	346 7285 7286 7287 K2 KW41 PA459 PsaV PsaVI
scf_12387_237_contig_13	2423	g	A	A	A	A	A	A	A	A	A	g	346 7285 7286 7287 K2 KW41 PA459 PsaV PsaVI
scf_12387_237_contig_13	2510	c	T	T	T	T	T	T	T	T	T	c	346 7285 7286 7287 K2 KW41 PA459 PsaV PsaVI
scf_12387_237_contig_13	2567	g	A	A	A	A	A	A	A	A	A	g	346 7285 7286 7287 K2 KW41 PA459 PsaV PsaVI
scf_12387_237_contig_13	2691	g	T	T	T	T	T	T	T	T	T	g	346 7285 7286 7287 K2 KW41 PA459 PsaV PsaVI
scf_12387_237_contig_13	2823	c	A	A	A	A	A	A	A	A	A	c	346 7285 7286 7287 K2 KW41 PA459 PsaV PsaVI
scf_12387_237_contig_13	4159	c	T	T	T	T	T	T	T	T	T	c	346 7285 7286 7287 K2 KW41 PA459 PsaV PsaVI
scf_12387_237_contig_13	433	t	C	C	C	C	C	C	C	C	C	t	346 7285 7286 7287 K2 KW41 PA459 PsaV PsaVI
scf_12387_237_contig_13	484	c	T	T	T	T	T	T	T	T	T	c	346 7285 7286 7287 K2 KW41 PA459 PsaV PsaVI
scf_12387_237_contig_13	5610	g	A	A	A	A	A	A	A	A	A	g	346 7285 7286 7287 K2 KW41 PA459 PsaV PsaVI
scf_12387_237_contig_13	8500	g	A	A	A	A	A	A	A	A	A	g	346 7285 7286 7287 K2 KW41 PA459 PsaV PsaVI
scf_12387_237_contig_13	9666	c	T	T	T	T	T	T	T	T	T	c	346 7285 7286 7287 K2 KW41 PA459 PsaV PsaVI
scf_12387_237_contig_141	1139	c	A	A	A	A	A	A	A	A	A	c	346 7285 7286 7287 K2 KW41 PA459 PsaV PsaVI
scf_12387_237_contig_141	1670	g	T	T	T	T	T	T	T	T	T	g	346 7285 7286 7287 K2 KW41 PA459 PsaV PsaVI
scf_12387_237_contig_141	1754	g	A	A	A	A	A	A	A	A	A	g	346 7285 7286 7287 K2 KW41 PA459 PsaV PsaVI
scf_12387_237_contig_141	185	a	G	G	G	G	G	G	G	G	G	a	346 7285 7286 7287 K2 KW41 PA459 PsaV PsaVI
scf_12387_237_contig_141	1865	g	A	A	A	A	A	A	A	A	A	g	346 7285 7286 7287 K2 KW41 PA459 PsaV PsaVI
scf_12387_237_contig_141	1991	t	C	C	C	C	C	C	C	C	C	t	346 7285 7286 7287 K2 KW41 PA459 PsaV PsaVI
scf_12387_237_contig_141	2120	c	A	A	A	A	A	A	A	A	A	c	346 7285 7286 7287 K2 KW41 PA459 PsaV PsaVI
scf_12387_237_contig_141	2126	c	T	T	T	T	T	T	T	T	T	c	346 7285 7286 7287 K2 KW41 PA459 PsaV PsaVI
scf_12387_237_contig_141	7207	a	G	G	G	G	G	G	G	G	G	a	346 7285 7286 7287 K2 KW41 PA459 PsaV PsaVI
scf_12387_237_contig_149	1221	t	C	C	C	C	C	C	C	C	C	t	346 7285 7286 7287 K2 KW41 PA459 PsaV PsaVI
scf_12387_237_contig_149	1887	a	G	G	G	G	G	G	G	G	G	a	346 7285 7286 7287 K2 KW41 PA459 PsaV PsaVI
scf_12387_237_contig_149	1944	c	T	T	T	T	T	T	T	T	T	c	346 7285 7286 7287 K2 KW41 PA459 PsaV PsaVI
scf_12387_237_contig_149	2578	a	G	G	G	G	G	G	G	G	G	a	346 7285 7286 7287 K2 KW41 PA459 PsaV PsaVI
scf_12387_237_contig_149	2658	g	A	A	A	A	A	A	A	A	A	g	346 7285 7286 7287 K2 KW41 PA459 PsaV PsaVI
scf_12387_237_contig_149	853	t	G	G	G	G	G	G	G	G	G	t	346 7285 7286 7287 K2 KW41 PA459 PsaV PsaVI
scf_12387_237_contig_149	994	g	A	A	A	A	A	A	A	A	A	g	346 7285 7286 7287 K2 KW41 PA459 PsaV PsaVI
scf_12387_237_contig_17	175	c	T	T	T	T	T	T	T	T	T	c	346 7285 7286 7287 K2 KW41 PA459 PsaV PsaVI
scf_12387_237_contig_1	1349	a	G	G	G	G	G	G	G	G	G	a	346 7285 7286 7287 K2 KW41 PA459 PsaV PsaVI
scf_12387_237_contig_1	377	g	C	C	C	C	C	C	C	C	C	g	346 7285 7286 7287 K2 KW41 PA459 PsaV PsaVI
scf_12387_237_contig_25	136	g	A	A	A	A	A	A	A	A	A	g	346 7285 7286 7287 K2 KW41 PA459 PsaV PsaVI
scf_12387_237_contig_25	153	t	A	A	A	A	A	A	A	A	A	t	346 7285 7286 7287 K2 KW41 PA459 PsaV PsaVI
scf_12387_237_contig_25	275	c	T	T	T	T	T	T	T	T	T	c	346 7285 7286 7287 K2 KW41 PA459 PsaV PsaVI
scf_12387_237_contig_25	510	g	A	A	A	A	A	A	A	A	A	g	346 7285 7286 7287 K2 KW41 PA459 PsaV PsaVI
scf_12387_237_contig_25	5838	a	C	C	C	C	C	C	C	C	C	a	346 7285 7286 7287 K2 KW41 PA459 PsaV PsaVI
scf_12387_237_contig_25	5912	g	A	A	A	A	A	A	A	A	A	g	346 7285 7286 7287 K2 KW41 PA459 PsaV PsaVI
scf_12387_237_contig_25	5996	c	T	T	T	T	T	T	T	T	T	c	346 7285 7286 7287 K2 KW41 PA459 PsaV PsaVI
scf_12387_237_contig_25	6083	g	A	A	A	A	A	A	A	A	A	g	346 7285 7286 7287 K2 KW41 PA459 PsaV PsaVI
scf_12387_237_contig_25	6191	c	G	G	G	G	G	G	G	G	G	c	346 7285 7286 7287 K2 KW41 PA459 PsaV PsaVI
scf_12387_237_contig_25	6419	g	C	C	C	C	C	C	C	C	C	g	346 7285 7286 7287 K2 KW41 PA459 PsaV PsaVI
scf_12387_237_contig_25	6758	g	A	A	A	A	A	A	A	A	A	g	346 7285 7286 7287 K2 KW41 PA459 PsaV PsaVI
scf_12387_237_contig_25	6859	g	T	T	T	T	T	T	T	T	T	g	346 7285 7286 7287 K2 KW41 PA459 PsaV PsaVI
scf_12387_237_contig_29	116	t	C	C	C	C	C	C	C	C	C	t	346 7285 7286 7287 K2 KW41 PA459 PsaV PsaVI
scf_12387_237_contig_29	324	g	A	A	A	A	A	A	A	A	A	g	346 7285 7286 7287 K2 KW41 PA459 PsaV PsaVI
scf_12387_237_contig_31	1766	c	G	G	G	G	G	G	G	G	G	c	346 7285 7286 7287 K2 KW41 PA459 PsaV PsaVI
scf_12387_237_contig_31	588	g	C	C	C	C	C	C	C	C	C	g	346 7285 7286 7287 K2 KW41 PA459 PsaV PsaVI
scf_12387_237_contig_31	654	g	A	A	A	A	A	A	A	A	A	g	346 7285 7286 7287 K2 KW41 PA459 PsaV PsaVI
scf_12387_237_contig_31	657	g	A	A	A	A	A	A	A	A	A	g	346 7285 7286 7287 K2 KW41 PA459 PsaV PsaVI
scf_12387_237_contig_31	832	t	C	C	C	C	C	C	C	C	C	t	346 7285 7286 7287 K2 KW41 PA459 PsaV PsaVI
scf_12387_237_contig_31	876	g	C	C	C	C	C	C	C	C	C	g	346 7285 7286 7287 K2 KW41 PA459 PsaV PsaVI
scf_12387_237_contig_33	182	g	A	A	A	A	A	A	A	A	A	g	346 7285 7286 7287 K2 KW41 PA459 PsaV PsaVI
scf_12387_237_contig_33	2010	a	G	G	G	G	G	G	G	G	G	a	346 7285 7286 7287 K2 KW41 PA459 PsaV PsaVI
scf_12387_237_contig_33	2076	g	A	A	A	A	A	A	A	A	A	g	346 7285 7286 7287 K2 KW41 PA459 PsaV PsaVI
scf_12387_237_contig_33	2619	g	A	A	A	A	A	A	A	A	A	g	346 7285 7286 7287 K2 KW41 PA459 PsaV PsaVI
scf_12387_237_contig_33	2793	t	C	C	C	C	C	C	C	C	C	t	346 7285 7286 7287 K2 KW41 PA459 PsaV PsaVI
scf_12387_237_contig_33	2798	a	G	G	G	G	G	G	G	G	G	a	346 7285 7286 7287 K2 KW41 PA459 PsaV PsaVI
scf_12387_237_contig_33	475	g	A	A	A	A	A	A	A	A	A	g	346 7285 7286 7287 K2 KW41 PA459 PsaV PsaVI
scf_12387_237_contig_33	49	g	C	C	C	C	C	C	C	C	C	g	346 7285 7286 7287 K2 KW41 PA459 PsaV PsaVI
scf_12387_237_contig_33	552	g	A	A	A	A	A	A	A	A	A	g	346 7285 7286 7287 K2 KW41 PA459 PsaV PsaVI
scf_12387_237_contig_33	699	g	A	A	A	A	A	A	A	A	A	g	346 7285 7286 7287 K2 KW41 PA459 PsaV PsaVI
scf_12387_237_contig_35	415	g	T	T	T	T	T	T	T	T	T	g	346 7285 7286 7287 K2 KW41 PA459 PsaV PsaVI
scf_12387_237_contig_35	589	c	T	T	T	T	T	T	T	T	T	c	346 7285 7286 7287 K2 KW41 PA459 PsaV PsaVI
scf_12387_237_contig_37	310	a	G	G	G	G	G	G	G	G	G	a	346 7285 7286 7287 K2 KW41 PA459 PsaV PsaVI
scf_12387_237_contig_3	289	t	C	C	C	C	C	C	C	C	C	t	346 7285 7286 7287 K2 KW41 PA459 PsaV PsaVI
scf_12387_237_contig_3	4538	g	A	A	A	A	A	A	A	A	A	g	346 7285 7286 7287 K2 KW41 PA459 PsaV PsaVI
scf_12387_237_contig_47	1232	g	A	A	A	A	A	A	A	A	A	g	346 7285 7286 7287 K2 KW41 PA459 PsaV PsaVI
scf_12387_237_contig_47	1693	t	A	A	A	A	A	A	A	A	A	t	346 7285 7286 7287 K2 KW41 PA459 PsaV PsaVI
scf_12387_237_contig_47	2088	a	G	G	G	G	G	G	G	G	G	a	346 7285 7286 7287 K2 KW41 PA459 PsaV PsaVI
scf_12387_237_contig_47	2120	c	T	T	T	T	T	T	T	T	T	c	346 7285 7286 7287 K2 KW41 PA459 PsaV PsaVI
scf_12387_237_contig_47	3229	a	T	T	T	T	T	T	T	T	T	a	346 7285 7286 7287 K2 KW41 PA459 PsaV PsaVI
scf_12387_237_contig_47	3407	a	G	G	G	G	G	G	G	G	G	a	346 7285 7286 7287 K2 KW41 PA459 PsaV PsaVI
scf_12387_237_contig_47	3659	t	G	G	G	G	G	G	G	G	G	t	346 7285 7286 7287 K2 KW41 PA459 PsaV PsaVI
scf_12387_237_contig_47	3767	a	G	G	G	G	G	G	G	G	G	a	346 7285 7286 7287 K2 KW41 PA459 PsaV PsaVI
scf_12387_237_contig_47	3770	t	C	C	C	C	C	C	C	C	C	t	346 7285 7286 7287 K2 KW41 PA459 PsaV PsaVI
scf_12387_237_contig_47	3823	g	A	A	A	A	A	A	A	A	A	g	346 7285 7286 7287 K2 KW41 PA459 PsaV PsaVI
scf_12387_237_contig_51	1034	a	G	G	G	G	G	G	G	G	G	a	346 7285 7286 7287 K2 KW41 PA459 PsaV PsaVI
scf_12387_237_contig_51	1130	a	T	T	T	T	T	T	T	T	T	a	346 7285 7286 7287 K2 KW41 PA459 PsaV PsaVI
scf_12387_237_contig_51	353	g	C	C	C	C	C	C	C	C	C	g	346 7285 7286 7287 K2 KW41 PA459 PsaV PsaVI
scf_12387_237_contig_51	489	t	C	C	C	C	C	C	C	C	C	t	346 7285 7286 7287 K2 KW41 PA459 PsaV PsaVI
scf_12387_237_contig_51	851	t	C	C	C	C	C	C	C	C	C	t	346 7285 7286 7287 K2 KW41 PA459 PsaV PsaVI
scf_12387_237_contig_55	159	a	G	G	G	G	G	G	G	G	G	a	346 7285 7286 7287 K2 KW41 PA459 PsaV PsaVI
scf_12387_237_contig_55	174	c	G	G	G	G	G	G	G	G	G	c	346 7285 7286 7287 K2 KW41 PA459 PsaV PsaVI
scf_12387_237_contig_55	340	c	A	A	A	A	A	A	A	A	A	c	346 7285 7286 7287 K2 KW41 PA459 PsaV PsaVI
scf_12387_237_contig_55	399	c	A	A	A	A	A	A	A	A	A	c	346 7285 7286 7287 K2 KW41 PA459 PsaV PsaVI
scf_12387_237_contig_55	655	c	T	T	T	T	T	T	T	T	T	c	346 7285 7286 7287 K2 KW41 PA459 PsaV PsaVI
scf_12387_237_contig_59	4522	c	A	A	A	A	A	A	A	A	A	c	346 7285 7286 7287 K2 KW41 PA459 PsaV PsaVI
scf_12387_237_contig_59	5124	c	T	T	T	T	T	T	T	T	T	c	346 7285 7286 7287 K2 KW41 PA459 PsaV PsaVI
scf_12387_237_contig_59	7576	c	T	T	T	T	T	T	T	T	T	c	346 7285 7286 7287 K2 KW41 PA459 PsaV PsaVI
[truncated: 19,497 more rows]
